# Supplementary material for: Acid-catalyzed [2 + 2 + 2] cycloaddition of two cyanamides and one ynamide: highly regioselective synthesis of 2,4,6-triaminopyrimidines
Source: Royal Society of Chemistry journal article supplement (doi:10.1039/d1ob00513h), 2021-01-01
Supplement: d1ob00513h1.pdf [file d1ob00513h1.pdf]

*Supporting Information for*

## **Acid-Catalyzed [2+2+2] Cycloaddition of Two Cyanamides and One Ynamide: Highly Regioselective Synthesis of 2,4,6-Triaminopyrimidines**

Alexey Yu. Dubovtsev,<sup>\*a</sup> Valeria V. Zvereva,<sup>a</sup> Nikolay V. Shcherbakov,<sup>a</sup> Dmitry V. Dar'in,<sup>a</sup>  
Alexander S. Novikov,<sup>a</sup> and Vadim Yu. Kukushkin<sup>\*a,b</sup>

<sup>a</sup>Saint Petersburg State University, Universitetskaya Nab. 7/9 199034 Saint Petersburg, Russian Federation

<sup>b</sup>South Ural State University, Chelyabinsk 454080, Russian Federation

E-mail: [a.dubovtsev@spbu.ru](mailto:a.dubovtsev@spbu.ru) (A.Yu.D.), [v.kukushkin@spbu.ru](mailto:v.kukushkin@spbu.ru) (V.Yu.K.)

### **Table of Contents**

|      |                                                                                              |    |
|------|----------------------------------------------------------------------------------------------|----|
| 1    | General Remarks .....                                                                        | 2  |
| 2    | Experimental Procedures and Characterization Data.....                                       | 3  |
| 2.1. | General Procedure for the TfOH-Catalyzed Synthesis of Pyrimidines <b>3,6</b> .....           | 3  |
| 2.2. | Gram-Scale Synthesis of <b>7</b> .....                                                       | 12 |
| 2.3. | Detosylation of <b>7</b> .....                                                               | 12 |
| 2.4. | Debenzylation of <b>7</b> .....                                                              | 13 |
| 2.5. | Debenzylation of <b>3i</b> .....                                                             | 13 |
| 2.6. | General Procedure for the Synthesis of Starting Ynamides from<br>(Bromoethynyl)benzene ..... | 14 |
| 2.7. | General Procedure for the Synthesis of Starting Ynamides from 1,1-Dibromo-1-alkenes<br>15    |    |
| 3    | References .....                                                                             | 17 |
| 4    | NMR Spectra.....                                                                             | 18 |
| 5.   | Computational Details .....                                                                  | 58 |

## 1 General Remarks

NMR spectra were recorded at ambient temperature with a Bruker Avance III 400 instrument at 400.13 MHz ( $^1\text{H}$  NMR) and 100.61 MHz ( $^{13}\text{C}$  NMR) in  $\text{CDCl}_3$  or  $\text{DMSO-}d_6$ . Chemical shifts ( $\delta$ ) are given in ppm relative to resonances of the solvents ( $^1\text{H}$ :  $\delta = 7.26$  for residual  $\text{CHCl}_3$  peak,  $\delta = 2.50$  for residual DMSO peak;  $^{13}\text{C}$ :  $\delta = 77.2$  for  $\text{CDCl}_3$ ,  $\delta = 39.5$  for  $\text{DMSO-}d_6$ ). Mass-spectra were recorded on Bruker MicroTOF (ESI) and Bruker maXis HRMS-ESI-QTOF instruments. Chromatographic separation was carried out on Macherey–Nagel silica gel 60 M (0.04–0.063 mm). Analytical TLC was performed on unmodified Merck ready-to-use plates (TLC silica gel 60 F254); detection was achieved with a UV lamp. Melting points were measured with Stuart smp30 apparatus. Known ynamides **1** were prepared by the literature procedures.<sup>1,2</sup> Triflic acid was distilled from the mixture with triflic anhydride under dry argon atmosphere. The solvents were purified using standard techniques and stored over activated 4 Å molecular sieves before use. Other reagents were purchased from commercial vendors and were used as received. For known compounds **1a',e,g,h**, **3a**, **6a,d,h,j–l**, the  $^1\text{H}$  and  $^{13}\text{C}$  NMR spectra are consistent with previously reported literature.

## 2 Experimental Procedures and Characterization Data

### 2.1. General Procedure for the TfOH-Catalyzed Synthesis of Pyrimidines 3,6

A flame-dried 10 mL round-bottom flask was charged with ynamide (**1**, 0.2 mmol) and cyanamide **2** (0.6 mmol, 3.0 equiv). The flask was fitted with a rubber septum, evacuated under high vacuum, and backfilled with argon. Dry and degassed solution of TfOH (3.0 mg, 0.02 mmol, 10 mol %) in DCE (1 mL) was next added and the reaction mixture was heated at 80 °C for 24 h with stirring. After completion, all volatile components were removed in vacuo and the residue was purified by silica gel chromatography eluting with hexane/EtOAc/Et<sub>3</sub>N to afford pyrimidines **3,6**.

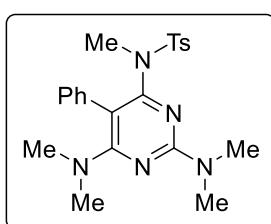

**N-(2,6-Bis(dimethylamino)-5-phenylpyrimidin-4-yl)-N,4-dimethylbenzenesulfonamide (3a)**<sup>3</sup>: colorless solid (76.7 mg, 90%); *R<sub>f</sub>* 0.38 (hexane/EtOAc 4:1); <sup>1</sup>H NMR (400 MHz, CDCl<sub>3</sub>) δ 7.81 (d, *J* = 8.3 Hz, 2H, Ar), 7.43–7.36 (m, 4H, Ar), 7.30–7.28 (m, 1H, Ar), 7.24 (d, *J* = 8.1 Hz, 2H, Ar), 2.99 (s, 6H, NMe<sub>2</sub>), 2.72 (s, 6H, NMe<sub>2</sub>), 2.64 (s, 3H, NMe), 2.44 (s, 3H, Me); <sup>13</sup>C NMR (100 MHz, CDCl<sub>3</sub>) δ 165.1, 160.4, 160.3, 142.8, 136.9, 136.8, 131.0, 129.1, 128.9, 128.2, 126.7, 107.2, 40.6, 36.9, 36.7, 21.7; HRMS (ESI): *m/z* [M + H]<sup>+</sup> calcd. for C<sub>28</sub>H<sub>32</sub>N<sub>5</sub>O<sub>2</sub>S<sup>+</sup>: 426.1958; found: 426.1970.

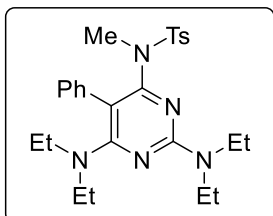

**N-(2,6-Bis(diethylamino)-5-phenylpyrimidin-4-yl)-N,4-dimethylbenzenesulfonamide (3b)**: colorless solid (68.4 mg, 71%); mp 111.9–113.7 °C (hexane/EtOAc); *R<sub>f</sub>* 0.38 (hexane/EtOAc 8:1); <sup>1</sup>H NMR (400 MHz, CDCl<sub>3</sub>) δ 7.83 (d, *J* = 8.2 Hz, 2H, Ar), 7.43 (d, *J* = 7.0 Hz, 2H, Ar), 7.37 (t, *J* = 7.5 Hz, 2H, Ar), 7.30–7.28 (m, 1H, Ar), 7.23 (d, *J* = 8.0 Hz, 2H, Ar), 3.44 (br. s, 4H, 2CH<sub>2</sub>), 3.17 (q, *J* = 7.0 Hz, 4H, 2CH<sub>2</sub>), 2.61 (s, 3H, NMe), 2.41 (s, 3H, Me), 1.13–1.08 (m, 6H, 2CH<sub>3</sub>), 0.93 (t, *J* = 7.0 Hz, 6H, 2CH<sub>3</sub>); <sup>13</sup>C NMR (100 MHz, CDCl<sub>3</sub>) δ 164.2, 160.2, 159.4, 142.7, 137.2, 137.1, 131.0, 128.9, 128.8, 128.2, 126.8, 107.6, 43.9, 41.6, 36.9, 21.6, 13.7, 13.1; HRMS (ESI): *m/z* [M + H]<sup>+</sup> calcd. for C<sub>26</sub>H<sub>36</sub>N<sub>5</sub>O<sub>2</sub>S<sup>+</sup>: 482.2584; found: 482.2593.

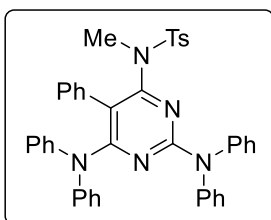

**N-(2,6-Bis(diphenylamino)-5-phenylpyrimidin-4-yl)-N,4-dimethylbenzenesulfonamide (3c)**: colorless solid (115.8 mg, 86%); mp 191.0–192.4 °C (hexane/EtOAc); *R<sub>f</sub>* 0.39 (hexane/EtOAc 4:1); <sup>1</sup>H NMR (400 MHz, CDCl<sub>3</sub>) δ 7.53 (d, *J* = 8.3 Hz, 2H, Ar), 7.17–7.13 (m, 10H, Ar), 7.10–6.91 (m, 13H, Ar), 6.85 (d, *J* = 7.4 Hz, 4H, Ar), 2.42 (s, 3H, NMe), 2.34 (s, 3H, Me); <sup>13</sup>C NMR (100 MHz, CDCl<sub>3</sub>) δ 166.0, 161.8,

160.2, 145.9, 144.4, 142.9, 135.7, 134.0, 130.7, 129.2, 128.8, 128.7, 127.9, 127.4, 126.8, 126.0, 124.9, 124.2, 116.4, 36.5, 21.7; **HRMS** (ESI):  $m/z$   $[M + H]^+$  calcd. for  $C_{42}H_{36}N_5O_2S^+$ : 674.2584; found: 674.2583.

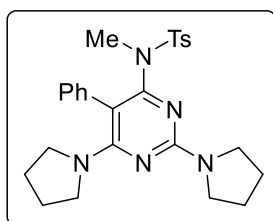

**N,4-Dimethyl-N-(5-phenyl-2,6-di(pyrrolidin-1-yl)pyrimidin-4-yl)benzenesulfonamide (3d)**: colorless solid (66.9 mg, 70%); mp 156.0–158.0 °C (hexane/EtOAc);  $R_f$  0.50 (hexane/EtOAc 4:1);  **$^1H$  NMR** (400 MHz,  $CDCl_3$ )  $\delta$  7.90 (d,  $J = 8.3$  Hz, 2H, Ar), 7.42–7.40 (m, 2H, Ar), 7.35 (t,  $J = 7.2$  Hz, 2H, Ar), 7.30–7.26 (m, 1H, Ar), 7.23 (d,  $J = 8.0$  Hz, 2H, Ar), 3.42 (br. s, 4H,  $2CH_2$ ), 3.14–3.10 (m, 4H,  $2CH_2$ ), 2.61 (s, 3H, Me), 2.41 (s, 3H, Me), 1.93–1.87 (m, 4H,  $2CH_2$ ), 1.71–1.65 (m, 4H,  $2CH_2$ );  **$^{13}C$  NMR** (100 MHz,  $CDCl_3$ )  $\delta$  161.9, 159.9, 159.0, 142.7, 137.0, 136.8, 131.9, 129.2, 128.8, 127.6, 126.8, 106.6, 49.5, 46.4, 36.9, 25.7, 25.6, 21.6; **HRMS** (ESI):  $m/z$   $[M + H]^+$  calcd. for  $C_{26}H_{32}N_5O_2S^+$ : 478.2271; found: 478.2280.

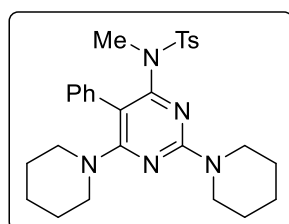

**N,4-Dimethyl-N-(5-phenyl-2,6-di(piperidin-1-yl)pyrimidin-4-yl)benzenesulfonamide (3e)**: colorless solid (79.9 mg, 79%); mp 177.0–178.7 °C (hexane/EtOAc);  $R_f$  0.32 (hexane/EtOAc 8:1);  **$^1H$  NMR** (400 MHz,  $DMSO-d_6$ )  $\delta$  7.62 (d,  $J = 7.9$  Hz, 2H, Ar), 7.42–7.28 (m, 7H, Ar), 3.41 (m, 4H,  $2CH_2$ ), 3.09–3.07 (m, 4H,  $2CH_2$ ), 2.59 (s, 3H, NMe), 2.38 (s, 3H, Me), 1.59–1.54 (m, 2H,  $CH_2$ ), 1.46–1.40 (m, 6H,  $3CH_2$ ), 1.31–1.25 (m, 4H,  $2CH_2$ );  **$^{13}C$  NMR** (100 MHz,  $CDCl_3$ )  $\delta$  166.1, 160.3, 159.7, 142.7, 136.9, 136.6, 130.3, 129.0, 128.8, 128.4, 126.7, 108.5, 48.7, 44.7, 37.0, 26.0, 25.6, 25.1, 24.7, 21.6; **HRMS** (ESI):  $m/z$   $[M + H]^+$  calcd. for  $C_{28}H_{36}N_5O_2S^+$ : 506.2584; found: 506.2599.

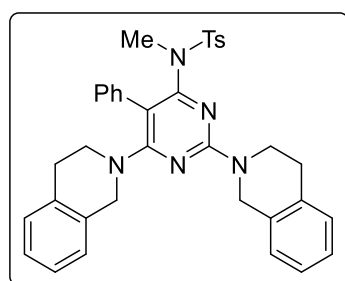

**Benzyl-N-(2,6-bis(diethylamino)-5-phenylpyrimidin-4-yl)-4-methylbenzenesulfonamide (3f)**: colorless solid (1.14 g, 75%); mp 167.0–169.0 °C (hexane/EtOAc);  $R_f$  0.50 (hexane/EtOAc 4:1);  **$^1H$  NMR** (400 MHz,  $CDCl_3$ )  $\delta$  7.82 (d,  $J = 8.0$  Hz, 2H, Ar), 7.51 (d,  $J = 6.9$  Hz, 2H, Ar), 7.44 (t,  $J = 7.5$  Hz, 2H, Ar), 7.35 (d,  $J = 7.2$  Hz, 1H, Ar), 7.31 (d,  $J = 8.0$  Hz, 2H, Ar), 7.24–7.17 (m, 3H, Ar), 7.15–7.05 (m, 4H, Ar), 6.99 (dd,  $J = 5.4, 3.5$  Hz, 1H, Ar), 4.67 (br. s, 2H,  $CH_2$ ), 4.44 (s, 2H,  $CH_2$ ), 3.88 (br. s, 2H,  $CH_2$ ), 3.46 (t,  $J = 5.7$  Hz, 2H,  $CH_2$ ), 2.89 (br. s, 2H,  $CH_2$ ), 2.71 (s, 3H, Me), 2.65 (t,  $J = 5.9$  Hz, 2H,  $CH_2$ ), 2.49 (s, 3H, Me);  **$^{13}C$  NMR** (100 MHz,  $CDCl_3$ )  $\delta$  165.6, 160.5, 159.5, 142.8, 137.0, 136.3, 135.3, 135.0, 134.61,

134.60, 130.5, 129.0, 129.0, 128.9, 128.7, 128.6, 127.1, 126.6, 126.5, 126.4, 126.3, 126.2, 126.0, 108.8, 49.7, 46.13, 46.07, 41.3, 37.2, 29.2, 28.4, 21.7; **HRMS** (ESI):  $m/z$   $[M + H]^+$  calcd. for  $C_{36}H_{36}N_5O_2S^+$ : 602.2584; found: 602.2579.

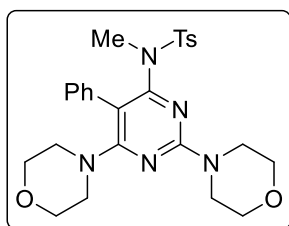

***N*-(2,6-Dimorpholino-5-phenylpyrimidin-4-yl)-*N*,4-dimethylbenzenesulfonamide (3g)**: colorless solid (81.6 mg, 80%); mp 164.3–166.0 °C (hexane/EtOAc);  $R_f$  0.42 (hexane/EtOAc 2:1);  **$^1H$  NMR** (400 MHz,  $CDCl_3$ )  $\delta$  7.71 (d,  $J = 8.0$  Hz, 2H, Ar), 7.46 (d,  $J = 7.0$  Hz, 2H, Ar), 7.41 (t,  $J = 7.5$  Hz, 2H, Ar), 7.30 (t,  $J = 7.2$  Hz, 1H, Ar), 7.23 (d,  $J = 8.0$  Hz, 2H, Ar), 3.67 (t,  $J = 4.7$  Hz, 4H,  $2CH_2$ ), 3.51–3.49 (m, 8H,  $4CH_2$ ), 3.18 (t,  $J = 4.7$  Hz, 4H,  $2CH_2$ ), 2.68 (s, 3H, NMe), 2.41 (s, 3H, Me);  **$^{13}C$  NMR** (100 MHz,  $CDCl_3$ )  $\delta$  165.8, 160.7, 159.7, 143.0, 136.8, 135.6, 130.3, 128.9, 128.9, 128.7, 127.3, 109.6, 67.0, 66.6, 48.0, 44.2, 37.2, 21.6; **HRMS** (ESI):  $m/z$   $[M + H]^+$  calcd. for  $C_{26}H_{32}N_5O_4S^+$ : 510.2170; found: 510.2182.

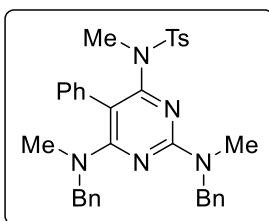

***N*-(2,6-Bis(benzyl(methyl)amino)-5-phenylpyrimidin-4-yl)-*N*,4-dimethylbenzenesulfonamide (3h)**: colorless oil (108.6 mg, 94%);  $R_f$  0.50 (hexane/EtOAc 4:1);  **$^1H$  NMR** (400 MHz,  $CDCl_3$ )  $\delta$  7.73 (br. s, 2H, Ar), 7.45 (d,  $J = 6.8$  Hz, 2H, Ar), 7.37–7.16 (m, 15H, Ar), 4.58 (br. s, 4H,  $2CH_2$ ), 2.93 (br. s, 3H, Me), 2.65 (s, 3H, Me), 2.54 (s, 3H, Me), 2.29 (br. s, 3H, Me);  **$^{13}C$  NMR** (100 MHz,  $CDCl_3$ )  $\delta$  164.8, 160.9, 160.3, 142.8, 139.2, 138.6, 136.7, 136.6, 131.1, 128.9, 128.5, 128.4, 128.2, 127.6, 127.4, 127.0, 126.9, 107.7, 55.2, 52.2, 39.0, 37.1, 34.6, 21.6; **HRMS** (ESI):  $m/z$   $[M + H]^+$  calcd. for  $C_{34}H_{36}N_5O_2S^+$ : 578.2584; found: 578.2594.

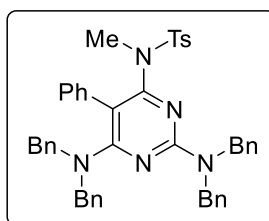

***N*-(2,6-Bis(dibenzylamino)-5-phenylpyrimidin-4-yl)-*N*,4-dimethylbenzenesulfonamide (3i)** was additionally recrystallized from hexane/EtOAc (4:1): colorless solid (110.9 mg, 76%); mp 129.0–130.0 °C (hexane/EtOAc);  $R_f$  0.45 (hexane/EtOAc 4:1);  **$^1H$  NMR** (400 MHz,  $CDCl_3$ )  $\delta$  7.68 (d,  $J = 8.3$  Hz, 2H, Ar), 7.45 (d,  $J = 6.9$  Hz, 2H, Ar), 7.32–7.19 (m, 15H, Ar), 7.14–7.13 (m, 4H, Ar), 7.04–7.02 (m, 4H, Ar), 6.86 (d,  $J = 8.0$  Hz, 2H, Ar), 4.68 (br. s, 2H,  $CH_2$ ), 4.51 (br. s, 2H,  $CH_2$ ), 4.37 (s, 4H,  $2CH_2$ ), 2.68 (s, 3H, NMe), 2.22 (s, 3H, Me);  **$^{13}C$  NMR** (100 MHz,  $CDCl_3$ )  $\delta$  165.2, 161.4, 160.4, 142.8, 138.8, 138.2, 136.6, 136.1, 130.9, 128.9, 128.7, 128.5, 128.4, 128.3, 127.8, 127.5, 127.2, 127.0, 126.9, 109.0, 52.4, 49.0, 37.2, 21.5; **HRMS** (ESI):  $m/z$   $[M + H]^+$  calcd. for  $C_{46}H_{44}N_5O_2S^+$ : 730.3210; found: 730.3214.

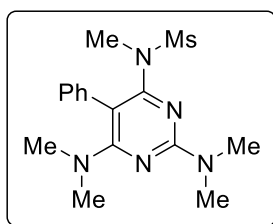

***N*-(2,6-Bis(dimethylamino)-5-phenylpyrimidin-4-yl)-*N*-methylmethanesulfonamide (6a)**<sup>3</sup>: colorless solid (60.9 mg, 87%);  $R_f$  0.30 (hexane/EtOAc 4:1);  $^1\text{H NMR}$  (400 MHz,  $\text{CDCl}_3$ )  $\delta$  7.37–7.31 (m, 4H, Ph), 7.25–7.21 (m, 1H, Ph), 3.19 (s, 3H, SMe), 3.14 (s, 6H, NMe<sub>2</sub>), 2.70 (s, 6H, NMe<sub>2</sub>), 2.69 (s, 3H, NMe);  $^{13}\text{C NMR}$  (100 MHz,  $\text{CDCl}_3$ )  $\delta$  165.0, 160.3 ( $\times 2$ ), 136.5, 130.8, 128.2, 126.7, 106.3, 40.6, 38.4, 36.9 ( $\times 2$ ); **HRMS** (ESI):  $m/z$  [M + H]<sup>+</sup> calcd. for C<sub>16</sub>H<sub>24</sub>N<sub>5</sub>O<sub>2</sub>S<sup>+</sup>: 350.1645; found: 350.1649.

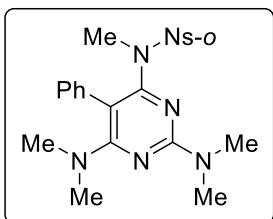

***N*-(2,6-Bis(dimethylamino)-5-phenylpyrimidin-4-yl)-*N*-methyl-2-nitrobenzenesulfonamide (6b)**: yellow solid (76.7 mg, 84%); mp 133.5–134.5 °C (hexane/EtOAc);  $R_f$  0.40 (hexane/EtOAc 2:1);  $^1\text{H NMR}$  (400 MHz,  $\text{CDCl}_3$ )  $\delta$  8.55–8.53 (m, 1H, Ar), 7.64–7.59 (m, 2H, Ar), 7.58–7.55 (m, 1H, Ar), 7.42–7.35 (m, 4H, Ar), 7.29–7.27 (m, 1H, Ar), 2.99 (s, 6H, 2Me), 2.73 (s, 6H, 2Me), 2.72 (s, 3H, Me);  $^{13}\text{C NMR}$  (100 MHz,  $\text{CDCl}_3$ )  $\delta$  165.1, 160.3, 159.1, 149.2, 136.3, 133.9, 132.9, 132.3, 131.0, 130.9, 128.4, 127.1, 123.6, 106.9, 40.7, 37.4, 36.8; **HRMS** (ESI):  $m/z$  [M + H]<sup>+</sup> calcd. for C<sub>21</sub>H<sub>25</sub>N<sub>6</sub>O<sub>4</sub>S<sup>+</sup>: 457.1653; found: 457.1659.

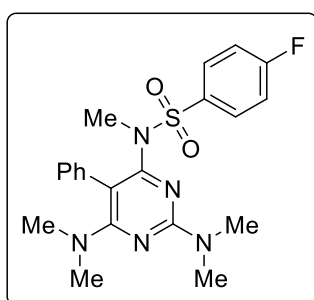

***N*-(2,6-Bis(dimethylamino)-5-phenylpyrimidin-4-yl)-4-fluoro-*N*-methylbenzenesulfonamide (6c)**: colorless solid (68.8 mg, 80%); mp 186.0–188.0 °C (hexane/EtOAc);  $R_f$  0.52 (hexane/EtOAc 4:1);  $^1\text{H NMR}$  (400 MHz,  $\text{CDCl}_3$ )  $\delta$  7.97–7.93 (m, 2H, Ar), 7.43–7.36 (m, 4H, Ar), 7.30–7.26 (m, 1H, Ar), 7.12 (t,  $J$  = 8.6 Hz, 2H, Ar), 2.99 (s, 6H, NMe<sub>2</sub>), 2.73 (s, 6H, NMe<sub>2</sub>), 2.65 (s, 3H, NMe);  $^{13}\text{C NMR}$  (100 MHz,  $\text{CDCl}_3$ )  $\delta$  165.0, 164.9 (d,  $J_F$  = 253.3 Hz), 160.3, 160.0, 136.7, 135.8 (d,  $J_F$  = 3.1 Hz), 131.6 (d,  $J_F$  = 9.1 Hz), 130.9, 128.2, 126.7, 115.4 (d,  $J_F$  = 22.4 Hz), 107.1, 40.5, 37.0, 36.7; **HRMS** (ESI):  $m/z$  [M + H]<sup>+</sup> calcd. for C<sub>21</sub>H<sub>25</sub>FN<sub>5</sub>O<sub>2</sub>S<sup>+</sup>: 430.1708; found: 430.1707.

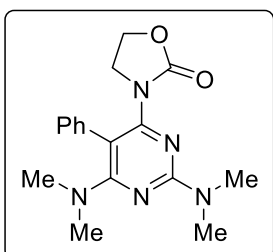

**3-(2,6-Bis(dimethylamino)-5-phenylpyrimidin-4-yl)oxazolidin-2-one (6d)**<sup>3</sup>: colorless solid (26.6 mg, 38%);  $R_f$  0.42 (hexane/EtOAc 1:1);  $^1\text{H NMR}$  (400 MHz,  $\text{CDCl}_3$ )  $\delta$  7.35–7.30 (m, 4H, Ph), 7.27–7.23 (m, 1H, Ph), 4.17–4.13 (m, 2H, CH<sub>2</sub>), 3.63–3.59 (m, 2H, CH<sub>2</sub>), 3.15 (s, 6H, NMe<sub>2</sub>), 2.72 (s, 6H, NMe<sub>2</sub>);  $^{13}\text{C NMR}$  (100 MHz,  $\text{CDCl}_3$ )  $\delta$  164.6, 160.2, 157.1, 155.8, 136.8, 130.4, 128.3, 127.0, 106.3, 62.7, 46.3, 40.6, 37.1; **HRMS** (ESI):  $m/z$  [M + H]<sup>+</sup> calcd. for C<sub>17</sub>H<sub>21</sub>N<sub>5</sub>NaO<sub>2</sub>S<sup>+</sup>: 350.1593 found: 350.1593.

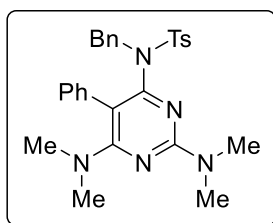

**N-Benzyl-N-(2,6-bis(dimethylamino)-5-phenylpyrimidin-4-yl)-4-methylbenzenesulfonamide (6e):** yellow solid (66.3 mg, 66%); mp 144.6–146.0 °C (hexane/EtOAc);  $R_f$  0.50 (hexane/EtOAc 4:1);  $^1\text{H NMR}$  (400 MHz,  $\text{CDCl}_3$ )  $\delta$  7.76 (d,  $J = 8.4$  Hz, 2H, Ar), 7.23 (d,  $J = 8.1$  Hz, 2H, Ar), 7.19–7.17 (m, 3H, Ar), 7.09 (t,  $J = 7.3$  Hz, 2H, Ar), 7.00–6.96 (m, 3H, Ar), 6.72 (d,  $J = 6.8$  Hz, 2H, Ar), 4.26 (s, 2H,  $\text{CH}_2\text{Ph}$ ), 3.03 (s, 6H,  $\text{NMe}_2$ ), 2.63 (s, 6H,  $\text{NMe}_2$ ), 2.42 (s, 3H, Me);  $^{13}\text{C NMR}$  (100 MHz,  $\text{CDCl}_3$ )  $\delta$  165.3, 159.8, 157.9, 143.1, 136.7, 136.4, 135.0, 131.4, 129.5, 129.4, 128.9, 128.0, 127.7, 127.3, 126.2, 109.6, 53.9, 40.6, 36.8, 21.7; **HRMS** (ESI):  $m/z$   $[\text{M} + \text{H}]^+$  calcd. for  $\text{C}_{28}\text{H}_{32}\text{N}_5\text{O}_2\text{S}^+$ : 502.2271; found: 502.2241.

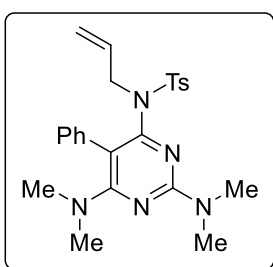

**N-Allyl-N-(2,6-bis(dimethylamino)-5-phenylpyrimidin-4-yl)-4-methylbenzenesulfonamide (6f):** colorless solid (57.9 mg, 64%); mp 112.4–113.8 °C (hexane/EtOAc);  $R_f$  0.65 (hexane/EtOAc 4:1);  $^1\text{H NMR}$  (400 MHz,  $\text{CDCl}_3$ )  $\delta$  7.82 (d,  $J = 8.4$  Hz, 2H, Ar), 7.44 (d,  $J = 7.3$  Hz, 2H, Ar), 7.36 (t,  $J = 7.9$  Hz, 2H, Ar), 7.28–7.26 (m, 1H, Ar), 7.23 (d,  $J = 7.7$  Hz, 2H, Ar), 5.29–5.17 (m, 1H, CH), 4.81–4.78 (m, 1H, CH), 4.77–4.76 (m, 1H, CH), 3.64 (d,  $J = 6.7$  Hz, 2H,  $\text{CH}_2$ ), 3.00 (s, 6H,  $\text{NMe}_2$ ), 2.72 (s, 6H,  $\text{NMe}_2$ ), 2.41 (s, 3H, Me);  $^{13}\text{C NMR}$  (100 MHz,  $\text{CDCl}_3$ )  $\delta$  165.4, 160.1, 158.4, 142.9, 137.2, 136.9, 132.8, 131.6, 129.3, 128.8, 128.0, 126.6, 118.1, 108.8, 52.9, 40.6, 36.7, 21.7; **HRMS** (ESI):  $m/z$   $[\text{M} + \text{H}]^+$  calcd. for  $\text{C}_{24}\text{H}_{30}\text{N}_5\text{O}_2\text{S}^+$ : 452.2115; found: 452.2117.

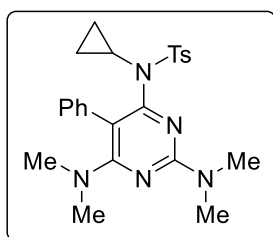

**N-(2,6-bis(dimethylamino)-5-phenylpyrimidin-4-yl)-N-cyclopropyl-4-methylbenzenesulfonamide (6g):** colorless solid (80.4 mg, 89%); mp 206.0–208.0 °C (hexane/EtOAc);  $R_f$  0.35 (hexane/EtOAc 8:1);  $^1\text{H NMR}$  (400 MHz,  $\text{CDCl}_3$ )  $\delta$  7.91 (d,  $J = 8.4$  Hz, 2H, Ar), 7.43 (br. s, 2H, Ar), 7.34 (t,  $J = 7.5$  Hz, 2H, Ar), 7.26–7.22 (m, 3H, Ar), 3.03 (s, 6H, 2Me), 2.73 (s, 6H, 2Me), 2.42 (s, 3H, Me), 2.29–2.24 (m, 1H, CH), 0.68–0.61 (m, 1H, CH), 0.48–0.41 (m, 1H, CH), 0.20–0.13 (m, 1H, CH), 0.01–(–0.05) (m, 1H, CH);  $^{13}\text{C NMR}$  (100 MHz,  $\text{CDCl}_3$ )  $\delta$  165.4, 160.3, 160.1, 143.0, 137.1, 136.8, 131.3, 129.6, 128.7, 127.9, 126.5, 107.8, 40.6, 36.7, 31.1, 21.7, 7.7, 5.4; **HRMS** (ESI):  $m/z$   $[\text{M} + \text{H}]^+$  calcd. for  $\text{C}_{19}\text{H}_{28}\text{N}_5\text{O}_2\text{S}^+$ : 390.1958; found: 390.1967.

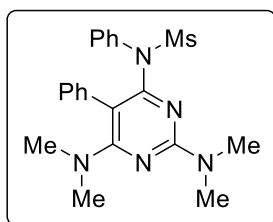

***N*-(2,6-Bis(dimethylamino)-5-phenylpyrimidin-4-yl)-*N*-phenylmethanesulfonamide (6h)**<sup>3</sup>: colorless solid (52.7 mg, 64%);  $R_f$  0.35 (hexane/EtOAc 4:1);  $^1\text{H NMR}$  (400 MHz,  $\text{CDCl}_3$ )  $\delta$  7.19–7.17 (m, 3H, Ph), 7.11–7.00 (m, 5H, Ph), 6.93–6.90 (m, 2H, Ph), 3.30 (s, 3H, MeS), 3.22 (s, 6H,  $\text{NMe}_2$ ), 2.68 (s, 6H,  $\text{NMe}_2$ );  $^{13}\text{C NMR}$  (100 MHz,  $\text{CDCl}_3$ )  $\delta$  164.6, 159.8 ( $\times 2$ ), 139.6, 136.3, 131.4, 128.4, 128.0, 127.7, 127.2, 126.6, 106.9, 40.7, 40.0, 37.3; **HRMS** (ESI):  $m/z$   $[\text{M} + \text{H}]^+$  calcd. for  $\text{C}_{21}\text{H}_{25}\text{N}_5\text{O}_2\text{S}^+$ : 412.1802; found: 412.1807.

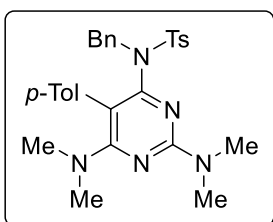

***N*-Benzyl-*N*-(2,6-bis(dimethylamino)-5-(*p*-tolyl)pyrimidin-4-yl)-4-methylbenzenesulfonamide (6i)**: yellow oil (83.6 mg, 81%);  $R_f$  0.44 (hexane/EtOAc 4:1);  $^1\text{H NMR}$  (400 MHz,  $\text{CDCl}_3$ )  $\delta$  7.76 (d,  $J = 8.0$  Hz, 2H, Ar), 7.22 (d,  $J = 8.0$  Hz, 2H, Ar), 7.09 (t,  $J = 7.4$  Hz, 1H, Ar), 7.01–6.96 (m, 4H, Ar), 6.92–6.88 (m, 2H, Ar), 6.74 (d,  $J = 7.5$  Hz, 2H, Ar), 4.24 (s, 2H,  $\text{CH}_2$ ), 3.02 (s, 6H,  $\text{NMe}_2$ ), 2.64 (s, 6H,  $\text{NMe}_2$ ), 2.42 (s, 3H, Me), 2.36 (s, 3H, Me);  $^{13}\text{C NMR}$  (100 MHz,  $\text{CDCl}_3$ )  $\delta$  165.5, 160.0, 158.2, 143.0, 136.9, 135.7, 135.2, 133.5, 131.2, 129.5, 129.4, 128.8, 128.5, 127.9, 127.2, 109.4, 53.9, 40.6, 36.7, 21.7, 21.4; **HRMS** (ESI):  $m/z$   $[\text{M} + \text{H}]^+$  calcd. for  $\text{C}_{26}\text{H}_{34}\text{N}_5\text{O}_2\text{S}^+$ : 516.2428; found: 516.2427.

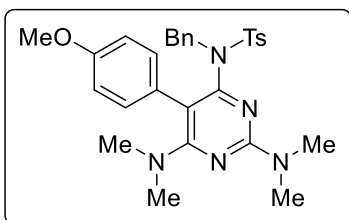

***N*-Benzyl-*N*-(2,6-bis(dimethylamino)-5-(4-methoxyphenyl)pyrimidin-4-yl)-4-methylbenzenesulfonamide (6j)**<sup>3</sup>: colorless solid (73.4 mg, 69%);  $R_f$  0.40 (hexane/EtOAc 4:1);  $^1\text{H NMR}$  (400 MHz,  $\text{CDCl}_3$ )  $\delta$  7.79 (d,  $J = 7.9$  Hz, 2H, Ar), 7.23 (d,  $J = 7.9$  Hz, 2H, Ar), 7.09 (t,  $J = 7.4$  Hz, 1H, Ar), 6.99 (t,  $J = 7.5$  Hz, 2H, Ar), 6.90–6.69 (m, 6H, Ar), 4.26 (s, 2H,  $\text{CH}_2$ ), 3.84 (s, 3H, OMe), 3.02 (s, 6H,  $\text{NMe}_2$ ), 2.64 (s, 6H,  $\text{NMe}_2$ ), 2.43 (s, 3H, Me);  $^{13}\text{C NMR}$  (100 MHz,  $\text{CDCl}_3$ )  $\delta$  165.6, 159.9, 158.2, 158.1, 143.0, 136.8, 135.2, 132.4, 129.5, 129.4, 128.8, 128.7, 127.9, 127.2, 113.1, 109.1, 55.3, 53.9, 40.5, 36.7, 21.7; **HRMS** (ESI):  $m/z$   $[\text{M} + \text{H}]^+$  calcd. for  $\text{C}_{29}\text{H}_{34}\text{N}_5\text{O}_3\text{S}^+$ : 532.2377; found: 532.2389.

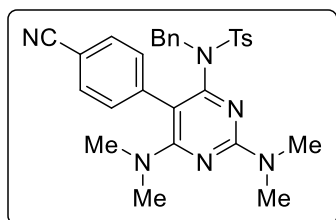

***N*-Benzyl-*N*-(5-(4-cyanophenyl)-2,6-bis(dimethylamino)pyrimidin-4-yl)-4-methylbenzenesulfonamide (6k)**<sup>3</sup>: colorless solid (66.3 mg, 61%);  $R_f$  0.54 (hexane/EtOAc 2:1);  $^1\text{H NMR}$  (400 MHz,  $\text{CDCl}_3$ )  $\delta$  7.80 (d,  $J = 8.0$  Hz, 2H, Ar), 7.39 (d,  $J = 7.9$  Hz, 2H, Ar), 7.28 (d,  $J = 13.0$  Hz, 2H, Ar), 7.12–6.96 (m, 5H,



Ar), 6.70 (d,  $J = 7.5$  Hz, 2H, Ar), 4.27 (s, 2H, CH<sub>2</sub>), 3.01 (s, 6H, NMe<sub>2</sub>), 2.60 (s, 6H, NMe<sub>2</sub>), 2.44 (s, 3H, Me); <sup>13</sup>C NMR (100 MHz, CDCl<sub>3</sub>)  $\delta$  165.1, 160.3, 158.1, 143.5, 142.2, 136.0, 134.6, 131.7, 131.3, 129.5, 129.3, 129.0, 128.1, 127.5, 119.5, 109.3, 107.9, 54.2, 40.6, 36.6, 21.7; **HRMS** (ESI):  $m/z$  [M + H]<sup>+</sup> calcd. for C<sub>29</sub>H<sub>31</sub>N<sub>6</sub>O<sub>2</sub>S<sup>+</sup>: 527.2224; found: 527.2240.

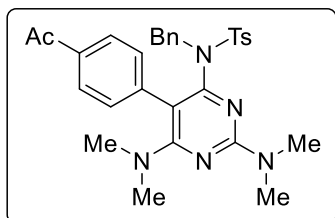

**N-(5-(4-Acetylphenyl)-2,6-bis(dimethylamino)pyrimidin-4-yl)-N-benzyl-4-methylbenzenesulfonamide (6l)**<sup>3</sup>: yellow solid (70.7 mg, 65%);  $R_f$  0.45 (hexane/EtOAc 2:1); <sup>1</sup>H NMR (400 MHz, CDCl<sub>3</sub>)  $\delta$  7.79 (d,  $J = 8.1$  Hz, 2H, Ar), 7.75 (d,  $J = 8.0$  Hz, 2H, Ar), 7.26 (d,  $J = 8.2$  Hz, 2H, Ar), 7.11–7.07 (m, 3H, Ar), 6.94 (t,  $J =$

7.7 Hz, 2H, Ar), 6.70 (d,  $J = 7.7$  Hz, 2H, Ar), 4.26 (s, 2H, CH<sub>2</sub>), 3.02 (s, 6H, NMe<sub>2</sub>), 2.63 (s, 3H, Me), 2.62 (s, 6H, NMe<sub>2</sub>), 2.44 (s, 3H, Me); <sup>13</sup>C NMR (101 MHz, CDCl<sub>3</sub>)  $\delta$  198.3, 165.3, 160.2, 158.0, 143.3, 142.3, 136.3, 134.71, 134.68, 131.4, 129.53, 129.48, 128.9, 128.1, 127.7, 127.4, 108.5, 54.1, 40.6, 36.7, 26.8, 21.7; **HRMS** (ESI):  $m/z$  [M + Na]<sup>+</sup> calcd. for C<sub>30</sub>H<sub>33</sub>N<sub>5</sub>NaO<sub>3</sub>S<sup>+</sup>: 566.2202; found: 566.2218.

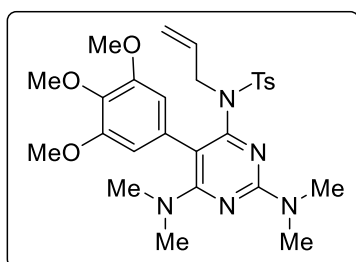

**N-Allyl-N-(2,6-bis(dimethylamino)-5-(3,4,5-trimethoxyphenyl)pyrimidin-4-yl)-4-methylbenzenesulfonamide (6m)**: colorless solid (104.0 mg, 69%); mp 156.0–157.0 °C (hexane/EtOAc);  $R_f$  0.30 (hexane/EtOAc 4:1); <sup>1</sup>H NMR (400 MHz, CDCl<sub>3</sub>)  $\delta$  7.87 (d,  $J = 8.3$  Hz, 2H, Ar), 7.26–7.24 (m, 2H, Ar), 6.76–6.74 (m, 2H, Ar), 5.29–5.17 (m, 1H, CH), 4.80–4.75 (m, 2H, 2CH), 3.91 (s, 3H, OMe), 3.87 (s, 6H, 2OMe), 3.65 (d,  $J = 6.6$  Hz, 2H, CH<sub>2</sub>), 3.00 (s, 6H, 2Me), 2.78 (s, 6H, 2Me), 2.42 (s, 3H, Me); <sup>13</sup>C NMR (100 MHz, CDCl<sub>3</sub>)  $\delta$  165.1, 160.1, 158.3, 152.8, 143.0, 137.2, 136.9, 133.1, 132.1, 129.3, 128.9, 117.8, 109.9, 109.0, 108.5, 61.2, 56.5, 52.9, 40.5, 36.7, 21.7; **HRMS** (ESI):  $m/z$  [M + H]<sup>+</sup> calcd. for C<sub>27</sub>H<sub>36</sub>N<sub>5</sub>O<sub>5</sub>S<sup>+</sup>: 542.2432; found:

542.2425.

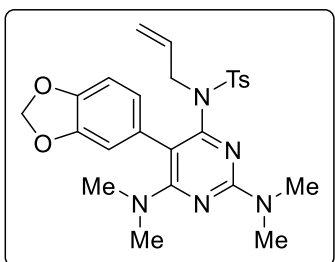

**N-Allyl-N-(5-(benzo[d][1,3]dioxol-5-yl)-2,6-bis(dimethylamino)pyrimidin-4-yl)-4-methylbenzenesulfonamide (6n)**: colorless solid (74.3 mg, 75%); mp 177.0–179.0 °C (hexane/EtOAc);  $R_f$  0.45 (hexane/EtOAc 4:1); <sup>1</sup>H NMR (400 MHz, CDCl<sub>3</sub>)  $\delta$  7.83 (d,  $J = 8.4$  Hz, 2H, Ar), 7.24 (d,  $J = 8.0$  Hz, 2H, Ar), 6.96–6.94 (m, 1H, Ar), 6.91–6.88 (m, 1H, Ar), 6.83–6.81 (m, 1H, Ar), 5.99 (s, 2H, CH<sub>2</sub>), 5.37–5.27 (m, 1H, CH), 4.84 (dd,  $J = 6.8, 1.5$  Hz, 1H, CH), 4.80 (s, 1H, CH), 3.70 (d,  $J = 6.7$  Hz, 2H, CH<sub>2</sub>), 2.98 (s, 6H, 2Me), 2.75 (s, 6H, 2Me), 2.41 (s, 3H, Me); <sup>13</sup>C NMR (100 MHz, CDCl<sub>3</sub>)  $\delta$  165.4, 160.0, 158.5, 147.3, 146.3, 143.0, 137.1, 132.8, 130.3,

129.3, 128.8, 125.0, 118.3, 112.00, 108.4, 107.9, 101.0, 53.0, 40.6, 36.7, 21.7; **HRMS** (ESI):  $m/z$   $[M + H]^+$  calcd. for  $C_{25}H_{30}N_5O_4S^+$ : 496.2013; found: 496.2008.

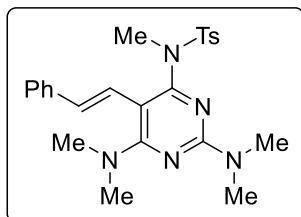

**(E)-N-(2,6-Bis(dimethylamino)-5-styrylpyrimidin-4-yl)-N,4-dimethylbenzenesulfonamide (6o)**: colorless solid (82.3 mg, 91%); mp 124.0–125.9 °C (hexane/EtOAc);  $R_f$  0.43 (hexane/EtOAc 4:1);  **$^1H$  NMR** (400 MHz,  $CDCl_3$ )  $\delta$  7.79 (d,  $J = 8.3$  Hz, 2H, Ar), 7.50 (d,  $J = 6.7$  Hz, 2H, Ar), 7.36–7.29 (m, 3H, Ar), 7.26 (d,  $J = 8.1$  Hz, 2H, Ar), 7.21 (t,  $J = 7.4$  Hz, 1H, Ar), 6.69 (d,  $J = 16.6$  Hz, 1H, CH), 3.03 (s, 6H,  $NMe_2$ ), 2.99 (s, 3H, Me), 2.97 (s, 6H,  $NMe_2$ ), 2.42 (s, 3H, Me);  **$^{13}C$  NMR** (100 MHz,  $CDCl_3$ )  $\delta$  166.2, 160.0, 159.4, 143.2, 138.7, 135.8, 129.3, 129.0, 128.9, 128.7, 127.0, 126.3, 123.2, 104.0, 41.1, 37.0, 36.7, 21.7; **HRMS** (ESI):  $m/z$   $[M + H]^+$  calcd. for  $C_{24}H_{30}N_5O_2S^+$ : 452.2115; found: 452.2117.

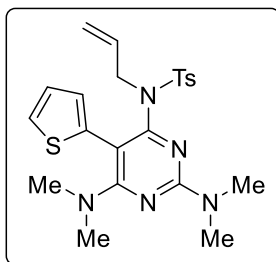

**N-Allyl-N-(2,6-bis(dimethylamino)-5-(thiophen-2-yl)pyrimidin-4-yl)-4-methylbenzenesulfonamide (6p)**: colorless solid (66.8 mg, 73%); mp 146.0–148.0 °C (hexane/EtOAc);  $R_f$  0.35 (hexane/EtOAc 8:1);  **$^1H$  NMR** (400 MHz,  $CDCl_3$ )  $\delta$  7.79 (d,  $J = 8.4$  Hz, 2H, Ar), 7.32 (dd,  $J = 5.2, 1.2$  Hz, 1H, Ar), 7.24 (d,  $J = 8.1$  Hz, 2H, Ar), 7.20 (dd,  $J = 3.5, 1.2$  Hz, 1H, Ar), 7.04 (dd,  $J = 5.2, 3.5$  Hz, 1H, Ar), 5.42–5.32 (m, 1H, CH), 4.85 (dd,  $J = 8.0, 1.5$  Hz, 1H, CH), 4.85 (s, 1H, CH), 3.78 (d,  $J = 6.7$  Hz, 2H,  $CH_2$ ), 2.97 (s, 6H, 2Me), 2.81 (s, 6H, 2Me), 2.41 (s, 3H, Me);  **$^{13}C$  NMR** (100 MHz,  $CDCl_3$ )  $\delta$  165.7, 160.0, 159.1, 143.0, 137.8, 136.7, 132.7, 129.6, 129.2, 128.8, 126.7, 125.8, 118.4, 101.6, 52.9, 40.2, 36.6, 21.6; **HRMS** (ESI):  $m/z$   $[M + H]^+$  calcd. for  $C_{22}H_{28}N_5O_2S_2^+$ : 458.1679; found: 458.1676.

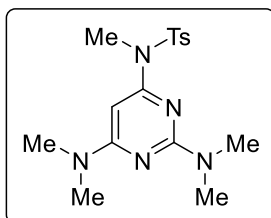

**N-(2,6-Bis(dimethylamino)pyrimidin-4-yl)-N,4-dimethylbenzenesulfonamide (6q)**<sup>3</sup>: colorless solid (42.6 mg, 61%);  $R_f$  0.40 (hexane/EtOAc 4:1);  **$^1H$  NMR** (400 MHz,  $CDCl_3$ )  $\delta$  7.66 (d,  $J = 8.3$  Hz, 2H, Ar), 7.22 (d,  $J = 8.0$  Hz, 2H, Ar), 6.04 (s, 1H, Ar), 3.35 (s, 3H,  $NMe$ ), 3.04 (s, 6H,  $NMe_2$ ), 3.01 (s, 6H,  $NMe_2$ ), 2.38 (s, 3H, Me);  **$^{13}C$  NMR** (100 MHz,  $CDCl_3$ )  $\delta$  164.0, 161.0, 159.8, 143.6, 136.1, 129.5, 127.5, 82.5, 37.3, 36.8, 34.6, 21.6; **HRMS** (ESI):  $m/z$   $[M + H]^+$  calcd. for  $C_{16}H_{24}N_5O_2S^+$ : 350.1645; found: 350.1651.

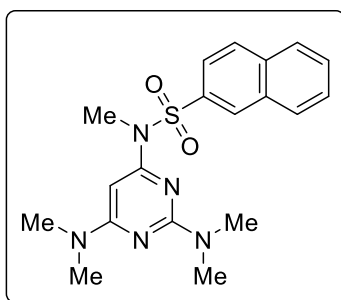

***N*-(2,6-Bis(dimethylamino)pyrimidin-4-yl)-*N*-methylnaphthalene-2-sulfonamide (6r)**: colorless oil (52.5 mg, 68%);  $R_f$  0.46 (hexane/EtOAc 4:1);  $^1\text{H NMR}$  (400 MHz,  $\text{CDCl}_3$ )  $\delta$  8.41 (s, 1H, Ar), 7.92 (d,  $J = 7.5$  Hz, 1H, Ar), 7.87 (d,  $J = 8.4$  Hz, 2H, Ar), 7.72 (dd,  $J = 8.7, 1.9$  Hz, 1H, Ar), 7.61 (dd,  $J = 7.4, 5.8$  Hz, 1H, Ar), 7.58 (dd,  $J = 7.3, 5.8$  Hz, 1H, Ar), 6.06 (s, 1H, Ar), 3.41 (s, 3H, Me), 3.04 (s, 6H,  $\text{NMe}_2$ ), 2.95 (s, 6H,  $\text{NMe}_2$ );  $^{13}\text{C NMR}$  (100 MHz,  $\text{CDCl}_3$ )  $\delta$  164.3, 161.3, 160.1, 136.3, 135.0, 132.1, 129.3, 129.1, 128.9, 128.8, 128.0, 127.5, 122.8, 82.6, 37.2, 36.7, 34.8; **HRMS** (ESI):  $m/z$   $[\text{M} + \text{H}]^+$  calcd. for  $\text{C}_{19}\text{H}_{24}\text{N}_5\text{O}_2\text{S}^+$ : 386.1645; found: 386.1651.

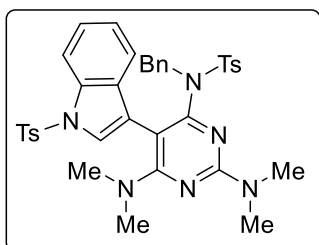

***N*-Benzyl-*N*-(2,6-bis(dimethylamino)-5-(1-tosyl-1*H*-indol-3-yl)pyrimidin-4-yl)-4-methylbenzenesulfonamide (6s)**: colorless solid (90.3 mg, 65%); mp 175.8–176.6 °C (hexane/EtOAc);  $R_f$  0.26 (hexane/EtOAc 4:1);  $^1\text{H NMR}$  (400 MHz,  $\text{CDCl}_3$ )  $\delta$  8.14–8.12 (m, 3H, Ar), 8.02 (d,  $J = 8.3$  Hz, 1H, Ar), 7.82 (d,  $J = 7.9$  Hz, 2H, Ar), 7.33–7.29 (m, 4H, Ar), 7.19 (t,  $J = 7.7$  Hz, 1H, Ar), 6.84 (t,  $J = 7.5$  Hz, 1H, Ar), 6.54 (t,  $J = 7.4$  Hz, 1H, Ar), 6.31 (br. s, 1H, Ar), 6.14 (br. s, 2H, Ar), 6.03 (br. s, 2H, Ar), 4.22 (dd,  $J = 107.0, 12.6$  Hz, 2H,  $\text{CH}_2$ ), 2.97 (s, 6H,  $\text{NMe}_2$ ), 2.61 (s, 6H,  $\text{NMe}_2$ ), 2.46 (s, 3H, Me), 2.27 (s, 3H, Me);  $^{13}\text{C NMR}$  (100 MHz,  $\text{CDCl}_3$ )  $\delta$  165.3, 160.1, 158.5, 144.8, 143.3, 135.9, 135.6, 134.2, 134.1, 131.6, 130.0, 129.3, 129.0, 128.6, 127.8, 127.2, 127.0, 126.7, 124.0, 122.9, 120.1, 118.3, 113.3, 99.9, 53.8, 39.5, 36.6, 21.7, 21.6; **HRMS** (ESI):  $m/z$   $[\text{M} + \text{H}]^+$  calcd. for  $\text{C}_{37}\text{H}_{39}\text{N}_6\text{O}_4\text{S}_2^+$ : 695.2469; found: 695.2466.

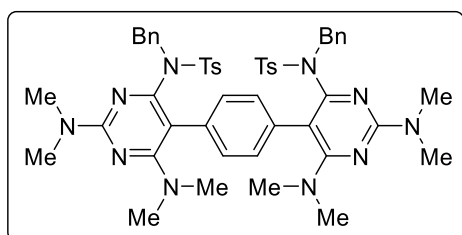

***N,N'*-(1,4-phenylenebis(2,6-bis(dimethylamino)pyrimidin-5,4-diyl))bis(*N*-benzyl-4-methylbenzenesulfonamide) (6t)**: colorless solid (105.5 mg, 57%); mp 284.0–286.0 °C (DCM);  $R_f$  0.35 (hexane/EtOAc 4:1);  $^1\text{H NMR}$  (400 MHz,  $\text{CDCl}_3$ )  $\delta$  7.82 (d,  $J = 8.2$  Hz, 4H, Ar), 7.26–7.22 (m, 6H, Ar), 7.17 (d,  $J = 7.3$  Hz, 2H, Ar), 7.11–6.86 (m, 10H, Ar), 4.27 (s, 4H,  $2\text{CH}_2$ ), 3.04 (s, 12H, 4Me), 2.76 (s, 12H, 4Me), 2.42 (s, 6H, 2Me);  $^{13}\text{C NMR}$  (100 MHz,  $\text{CDCl}_3$ )  $\delta$  165.2, 160.0, 158.1, 142.9, 137.0, 135.1, 134.7, 130.9, 130.0, 129.4, 128.8, 128.1, 127.7, 109.5, 53.9, 40.8, 36.7, 21.7; **HRMS** (ESI):  $m/z$   $[\text{M} + \text{H}]^+$  calcd. for  $\text{C}_{50}\text{H}_{57}\text{N}_{10}\text{O}_4\text{S}_2^+$ : 925.4000; found: 925.4021.

## 2.2. Gram-Scale Synthesis of 7

A flame-dried 50 mL round-bottom flask was charged with ynamide **1e** (1.08 g, 3.0 mmol) and *N,N'*-diethylcyanamide (**2b**, 0.88 g, 9.0 mmol, 3.0 equiv). The flask was fitted with a rubber septum, evacuated under high vacuum, and backfilled with argon. Dry and degassed solution of TfOH (45.0 mg, 0.3 mmol, 10 mol %) in DCE (10 mL) was next added and the reaction mixture was heated at 80 °C for 24 h with stirring. After completion, the resulting solution was cooled to room temperature, all volatile components were removed in vacuo and the residue was purified by silica gel chromatography eluting with hexane/EtOAc/Et<sub>3</sub>N to afford pyrimidine **7**.

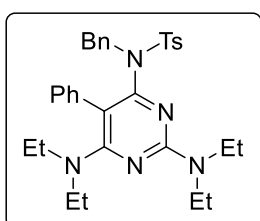

***N*-Benzyl-*N*-(2,6-bis(diethylamino)-5-phenylpyrimidin-4-yl)-4-methylbenzenesulfonamide (**7**):** colorless solid (1.14 g, 68%); mp 67.5–69.0 °C (hexane/EtOAc); *R<sub>f</sub>* 0.40 (hexane/EtOAc 8:1); **<sup>1</sup>H NMR** (400 MHz, CDCl<sub>3</sub>) δ 7.79 (d, *J* = 8.3 Hz, 2H, Ar), 7.24–7.20 (m, 5H, Ar), 7.13–6.99 (m, 5H, Ar), 6.74 (d, *J* = 7.2 Hz, 2H, Ar), 4.26 (s, 2H, Bn), 3.51 (q, *J* = 7.1 Hz, 4H, 2CH<sub>2</sub>), 3.11 (q, *J* = 7.0 Hz, 4H, 2CH<sub>2</sub>), 2.43 (s, 3H, Me), 1.16 (t, *J* = 7.0 Hz, 6H, 2Me), 0.87 (t, *J* = 7.0 Hz, 6H, 2Me); **<sup>13</sup>C NMR** (100 MHz, CDCl<sub>3</sub>) δ 164.7, 158.9, 158.0, 142.9, 137.0, 136.8, 135.2, 131.4, 129.3, 129.1, 128.8, 127.9, 127.7, 127.1, 126.2, 109.7, 53.6, 43.9, 41.4, 21.6, 13.8, 12.9; **HRMS** (ESI): *m/z* [M + H]<sup>+</sup> calcd. for C<sub>32</sub>H<sub>40</sub>N<sub>5</sub>O<sub>2</sub>S<sup>+</sup>: 558.2897; found: 558.2900.

## 2.3. Detosylation of 7

Sodium (2.8 mg, 0.12 mmol, 1.2 equiv) was added to the solution of naphthalene (25.6 mg, 0.20 mmol, 2.0 equiv) in dry THF (3.0 mL). The mixture was stirred at room temperature until deep green color was appeared. Then pyrimidine **7** (55.8 mg, 0.1 mmol) was added and the reaction was heated at 60 °C with stirring for 12 h. When the reaction was quenched by adding 10 ml of water and extracted with DCM (3 × 10 mL). The combined organic extracts were dried over anhydrous Na<sub>2</sub>SO<sub>4</sub>. After filtration, the solvent was removed in vacuo and the residue was purified by silica gel chromatography, eluting with hexane/EtOAc (8/1) to afford pyrimidine **8**.

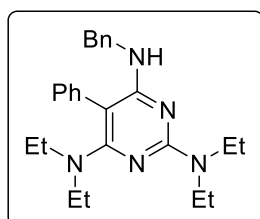

***N*<sup>4</sup>-Benzyl-*N*<sup>2</sup>,*N*<sup>2</sup>,*N*<sup>6</sup>,*N*<sup>6</sup>-tetraethyl-5-phenylpyrimidine-2,4,6-triamine (**8**):** brownish oil (24.6 mg, 61%); *R<sub>f</sub>* 0.50 (hexane/EtOAc 8:1); **<sup>1</sup>H NMR** (400 MHz, CDCl<sub>3</sub>) δ 7.37 (t, *J* = 7.5 Hz, 2H, Ph), 7.31–7.29 (m, 2H, Ph), 7.26–7.21 (m, 5H, Ph), 7.20–7.16 (m, 1H, Ph), 4.54 (s, 3H, CH<sub>2</sub>+NH), 3.56 (q, *J* = 7.0 Hz, 4H, 2CH<sub>2</sub>), 3.09 (q, *J* = 7.0 Hz,

4H, 2CH<sub>2</sub>), 1.13 (t, *J* = 7.0 Hz, 6H, 2Me), 0.88 (t, *J* = 6.9 Hz, 6H, 2Me); <sup>13</sup>C NMR (100 MHz, CDCl<sub>3</sub>) δ 162.1, 161.9, 159.1, 141.4, 138.5, 131.8, 129.3, 128.4, 127.2, 126.7, 126.6, 91.7, 45.1, 43.7, 41.6, 13.9, 13.4; HRMS (ESI): *m/z* [M + H]<sup>+</sup> calcd. for C<sub>25</sub>H<sub>34</sub>N<sub>5</sub><sup>+</sup>: 404.2809; found: 404.2799.

#### 2.4. Debenzylation of 7

A 50 mL round-bottom flask containing **7** (55.8 mg, 0.1 mmol) and 10% palladium on carbon (10.6 mg, 0.01 mmol, 10 mol %) was fitted with a rubber septum, evacuated under high vacuum and backfilled with hydrogen. Degassed MeOH (5 mL) was next added. The flask was equipped with a hydrogen balloon and the black suspension was heated at 50 °C for 24 h with stirring. After completion, all volatile components were removed in vacuo and the residue was purified by silica gel chromatography eluting with hexane/EtOAc (4/1) to afford pyrimidine **9**.

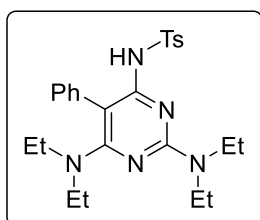

**N-(2,6-Bis(diethylamino)-5-phenylpyrimidin-4-yl)-4-methylbenzenesulfonamide (9)**: colorless solid (68.3 mg, 73%); mp 129.0–130.5 °C (hexane/EtOAc); *R<sub>f</sub>* 0.40 (hexane/EtOAc 4:1); <sup>1</sup>H NMR (400 MHz, CDCl<sub>3</sub>) δ 7.76 (br. s, 2H, Ar), 7.42–7.20 (m, 7H, Ar), 6.69 (br. s, 1H, NH), 3.42 (br. s, 4H, 2CH<sub>2</sub>), 3.09 (q, *J* = 7.1 Hz, 4H, 2CH<sub>2</sub>), 2.38 (s, 3H, Me), 1.11 (br. s, 6H, 2Me), 0.87 (t, *J* = 6.9 Hz, 6H, 2Me); <sup>13</sup>C NMR (100 MHz, CDCl<sub>3</sub>) δ 161.9, 155.1, 142.6, 136.1, 131.3, 129.2, 128.6, 127.6, 127.1, 126.6, 124.2, 94.3, 43.8, 41.8, 21.6, 13.5, 13.3; HRMS (ESI): *m/z* [M + H]<sup>+</sup> calcd. for C<sub>25</sub>H<sub>34</sub>N<sub>5</sub>O<sub>2</sub>S<sup>+</sup>: 468.2433; found: 468.2428.

#### 2.5. Debenzylation of 3i

A 50 mL round-bottom flask containing **3i** (73.0 mg, 0.1 mmol) and 10% palladium on carbon (10.6 mg, 0.01 mmol, 10 mol %) was fitted with a rubber septum, evacuated under high vacuum and backfilled with hydrogen. Degassed MeOH (5 mL) was next added. The flask was equipped with a hydrogen balloon and the black suspension was heated at 50 °C for 24 h with stirring. After completion, all volatile components were removed in vacuo and the residue was purified by silica gel chromatography eluting with DCM/MeOH to afford pyrimidines **10** and **10'**.

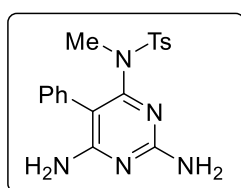

**N-(2,6-Diamino-5-phenylpyrimidin-4-yl)-N,4-dimethylbenzenesulfonamide (10)**: colorless oil (43.6 mg, 59%, 88% purity from NMR assay); *R<sub>f</sub>* 0.25 (DCM/MeOH 100:3); <sup>1</sup>H NMR (400 MHz, CDCl<sub>3</sub>) δ 7.66 (d, *J* = 8.4 Hz, 2H, Ar), 7.49–7.45 (m, 2H, Ar), 7.42–7.36 (m, 3H, Ar), 7.23 (d, *J* = 8.1 Hz, 2H, Ar), 4.79 (s, 2H, NH<sub>2</sub>), 4.70 (s, 2H, NH<sub>2</sub>),

2.74 (s, 3H, NMe), 2.41 (s, 3H, Me);  $^{13}\text{C}$  NMR (100 MHz,  $\text{CDCl}_3$ )  $\delta$  164.2, 161.7, 159.4, 143.4, 136.3, 133.3, 130.6, 130.6, 129.3, 129.2, 128.9, 128.1, 107.5, 36.7, 21.7; HRMS (ESI):  $m/z$   $[\text{M} + \text{H}]^+$  calcd. for  $\text{C}_{18}\text{H}_{20}\text{N}_5\text{O}_2\text{S}^+$ : 370.1332; found: 370.1324.

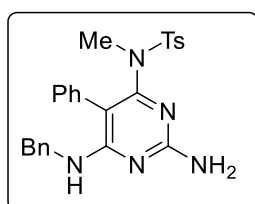

***N*-(2-Amino-6-(benzylamino)-5-phenylpyrimidin-4-yl)-*N*,4-dimethylbenzenesulfonamide (10')**: colorless oil (25.7 mg, 28%, 92% purity from NMR assay);  $R_f$  0.30 (DCM/MeOH 100:1);  $^1\text{H}$  NMR (400 MHz,  $\text{CDCl}_3$ )  $\delta$  7.66 (d,  $J = 8.4$  Hz, 2H, Ar), 7.48–7.43 (m, 2H, Ar), 7.41–7.35 (m, 3H, Ar), 7.32–7.29 (m, 2H, Ar), 7.26–7.22 (m, 5H, Ar), 5.03 (t,  $J = 5.9$  Hz, 1H, NH), 4.71 (s, 2H,  $\text{NH}_2$ ), 4.59 (d,  $J = 5.8$  Hz, 2H,  $\text{CH}_2$ ), 2.75 (s, 3H, NMe), 2.41 (s, 3H, Me);  $^{13}\text{C}$  NMR (100 MHz,  $\text{CDCl}_3$ )  $\delta$  163.2, 161.9, 158.3, 143.3, 139.1, 136.3, 133.2, 130.9, 129.4, 129.1, 128.9, 128.7, 128.1, 127.42, 127.35, 108.3, 45.0, 36.7, 21.7; HRMS (ESI):  $m/z$   $[\text{M} + \text{H}]^+$  calcd. for  $\text{C}_{25}\text{H}_{26}\text{N}_5\text{O}_2\text{S}^+$ : 460.1802; found: 460.1791.

## 2.6. General Procedure for the Synthesis of Starting Ynamides from (Bromoethynyl)benzene

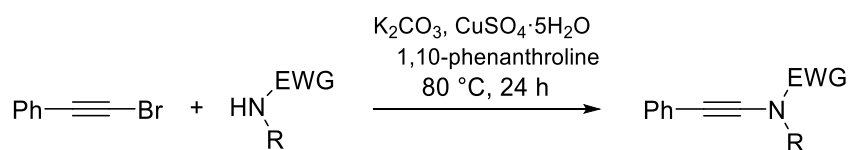

A 50 mL round-bottom flask was charged with amide (1.0 mmol),  $\text{K}_2\text{CO}_3$  (415 mg, 3.0 mmol, 3.0 equiv), 1,10-phenanthroline monohydrate (59.5 mg, 0.3 mmol, 30 mol %) and  $\text{CuSO}_4 \cdot 5\text{H}_2\text{O}$  (49.9 mg, 0.2 mmol, 20 mol %). The flask was fitted with a rubber septum, evacuated under high vacuum and backfilled with argon. Dry and degassed toluene (10 mL) and (bromoethynyl)benzene (199 mg, 1.1 mmol, 1.1 equiv) were next added and the suspension was heated at 80 °C for 12 h with stirring. After completion, all volatile components were removed in vacuo and the residue was purified by silica gel chromatography eluting with hexane/EtOAc to afford ynamides **1**.

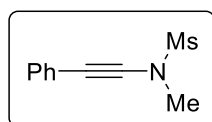

***N*-Methyl-*N*-(phenylethynyl)methanesulfonamide (1a')**:<sup>4</sup> orange solid (159 mg, 76%); mp 55.0–56.2 °C (hexane/EtOAc);  $R_f$  0.21 (hexane/EtOAc 4:1);  $^1\text{H}$  NMR (400 MHz,  $\text{CDCl}_3$ )  $\delta$  7.43–7.39 (m, 2H, Ar), 7.33–7.28 (m, 3H, Ar), 3.30 (s, 3H, Me), 3.12 (s, 3H, Me);  $^{13}\text{C}$  NMR (100 MHz,  $\text{CDCl}_3$ )  $\delta$  131.7, 128.5, 128.2, 122.5, 83.2, 69.6, 39.3, 36.9; HRMS (ESI):  $m/z$   $[\text{M} + \text{H}]^+$  calcd. for  $\text{C}_{10}\text{H}_{11}\text{NNaO}_2\text{S}^+$ : 232.0403; found: 232.0400.

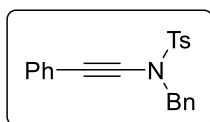

***N*-Benzyl-4-methyl-*N*-(phenylethynyl)benzenesulfonamide (1e):<sup>5</sup>**

yellow solid (213 mg, 59%); mp 76.5–78.8 °C (hexane/EtOAc);  $R_f$  0.41 (hexane/EtOAc 4:1);  $^1\text{H NMR}$  (400 MHz,  $\text{CDCl}_3$ )  $\delta$  7.83 (d,  $J = 6.5$  Hz, 2H, Ar), 7.38–7.32 (m, 7H, Ar), 7.29–7.26 (m, 5H, Ar), 4.61 (s, 2H,  $\text{CH}_2$ ), 2.46 (s, 3H, Me);  $^{13}\text{C NMR}$  (100 MHz,  $\text{CDCl}_3$ )  $\delta$  144.8, 134.8, 134.6, 131.3, 129.9, 129.0, 128.7, 128.5, 128.3, 127.9, 127.8, 123.0, 82.8, 71.5, 55.8, 21.8; **HRMS** (ESI):  $m/z$   $[\text{M} + \text{H}]^+$  calcd. for  $\text{C}_{22}\text{H}_{20}\text{NO}_2\text{S}^+$ : 384.1029; found: 384.1027.

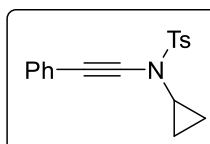

***N*-Cyclopropyl-4-methyl-*N*-(phenylethynyl)benzenesulfonamide**

**(1g):<sup>6</sup>** yellow solid (261 mg, 84%); mp 67.0–68.0 °C (hexane/EtOAc);  $R_f$  0.45 (hexane/EtOAc 4:1);  $^1\text{H NMR}$  (400 MHz,  $\text{CDCl}_3$ )  $\delta$  7.88 (d,  $J = 8.4$  Hz, 2H, Ar), 7.38–7.35 (m, 4H, Ar), 7.32–7.28 (m, 3H, Ar), 2.84 (tt,  $J = 7.0, 3.5$  Hz, 1H, CH), 2.46 (s, 3H, Me), 0.94–0.90 (m, 2H,  $\text{CH}_2$ ), 0.82–0.77 (m, 2H,  $\text{CH}_2$ );  $^{13}\text{C NMR}$  (100 MHz,  $\text{CDCl}_3$ )  $\delta$  144.9, 134.1, 131.5, 129.8, 128.4, 128.2, 127.9, 123.0, 82.0, 70.7, 33.1, 21.8, 6.6; **HRMS** (ESI):  $m/z$   $[\text{M} + \text{Na}]^+$  calcd. for  $\text{C}_{18}\text{H}_{17}\text{NNaO}_2\text{S}^+$ : 334.0872; found: 334.0876.

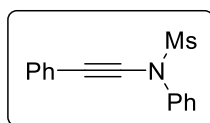

***N*-Phenyl-*N*-(phenylethynyl)methanesulfonamide (1h):<sup>7</sup>**

orange solid (52.0 mg, 19%); mp 76.1–77.0 °C (hexane/EtOAc);  $R_f$  0.33 (hexane/EtOAc 4:1);  $^1\text{H NMR}$  (400 MHz,  $\text{CDCl}_3$ )  $\delta$  7.59 (d,  $J = 8.2$  Hz, 2H, Ar), 7.47–7.43 (m, 4H, Ar), 7.40–7.35 (m, 1H, Ar), 7.34–7.30 (m, 3H, Ar), 3.16 (s, 3H, Me);  $^{13}\text{C NMR}$  (100 MHz,  $\text{CDCl}_3$ )  $\delta$  138.8, 131.7, 129.6, 128.5, 128.5, 128.4, 125.7, 122.4, 82.1, 71.1, 37.0; **HRMS** (ESI):  $m/z$   $[\text{M} + \text{H}]^+$  calcd. for  $\text{C}_{15}\text{H}_{13}\text{NNaO}_2\text{S}^+$ : 294.0559; found: 294.0556.

**2.7. General Procedure for the Synthesis of Starting Ynamides from 1,1-Dibromo-1-alkenes**

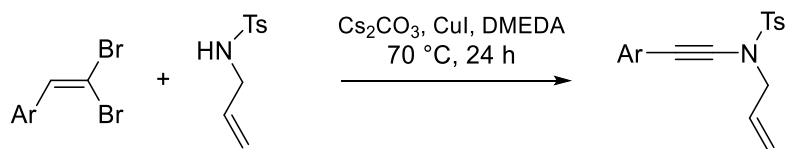

A 50 mL round-bottom flask was charged with *N*-allyl-4-methylbenzenesulfonamide (211 mg, 1.0 mmol), 1,1-dibromo-1-alkene (1.2 mmol, 1.2 equiv.),  $\text{Cs}_2\text{CO}_3$  (1.30 g, 4.0 mmol, 4.0 equiv), and copper(I) iodide (24 mg, 0.125 mmol, 12.5 mol %). The flask was fitted with a rubber septum, evacuated under high vacuum and backfilled with argon. Dry and degassed DMF (5 mL) and *N,N'*-dimethylethylenediamine (22 mg, 0.25 mmol, 25 mol %) were next added and the blue or green suspension was heated at 70 °C for 24 h with stirring. After completion, all volatile components

were removed in vacuo and the residue was purified by silica gel chromatography eluting with hexane/EtOAc to afford enynamides **1**.

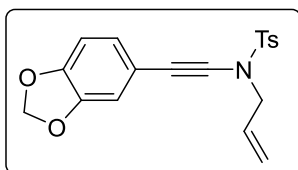

**N-Allyl-N-(benzo[*d*][1,3]dioxol-5-ylethynyl)-4-methylbenzenesulfonamide (1n)**: colorless oil (249 mg, 70%);  $R_f$  0.35 (hexane/EtOAc 8:1);  $^1\text{H NMR}$  (400 MHz,  $\text{CDCl}_3$ )  $\delta$  7.82 (d,  $J = 8.4$  Hz, 2H, Ar), 7.34 (d,  $J = 8.1$  Hz, 2H, Ar), 6.87 (dd,  $J = 8.0$ , 1.6 Hz, 1H, Ar), 6.79 (d,  $J = 1.6$ , Hz, 1H, Ar), 6.71 (d,  $J = 8.0$  Hz, 1H, Ar), 5.93 (m, 2H,  $\text{CH}_2$ ), 5.82–5.72 (m, 1H, CH), 5.27 (dd,  $J = 17.0$ , 1.4 Hz, 1H, CH), 5.22 (dd,  $J = 10.2$ , 1.3 Hz, 1H, CH), 4.02 (d,  $J = 6.4$  Hz, 2H,  $\text{CH}_2$ ), 2.44 (s, 3H, Me);  $^{13}\text{C NMR}$  (100 MHz,  $\text{CDCl}_3$ )  $\delta$  147.8, 147.4, 144.8, 134.7, 131.0, 129.8, 127.8, 126.4, 120.0, 115.9, 111.9, 108.4, 101.3, 80.7, 70.7, 54.5, 21.7.; **HRMS** (ESI):  $m/z$   $[\text{M} + \text{Na}]^+$  calcd. for  $\text{C}_{19}\text{H}_{17}\text{NNaO}_4\text{S}^+$ : 378.0770; found: 378.0774.

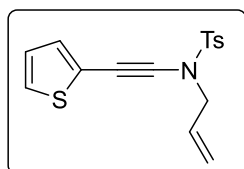

**N-Allyl-4-methyl-N-(thiophen-2-ylethynyl)benzenesulfonamide (1p)**: brown oil (200 mg, 63%);  $R_f$  0.35 (hexane/EtOAc 8:1);  $^1\text{H NMR}$  (400 MHz,  $\text{CDCl}_3$ )  $\delta$  7.83 (d,  $J = 8.3$  Hz, 2H, Ar), 7.36 (d,  $J = 8.1$  Hz, 2H, Ar), 7.25 (dd,  $J = 5.2$ , 1.2 Hz, 1H, Ar), 7.15 (dd,  $J = 3.6$ , 1.2 Hz, 1H, Ar), 6.95 (dd,  $J = 5.2$ , 3.6 Hz, 1H, Ar), 5.82–5.73 (m, 1H, CH), 5.30–5.25 (m, 1H, CH), 5.24–5.21 (m, 1H, CH), 4.05 (dt,  $J = 6.3$ , 1.3 Hz, 2H,  $\text{CH}_2$ ), 2.46 (s, 3H, Me);  $^{13}\text{C NMR}$  (100 MHz,  $\text{CDCl}_3$ )  $\delta$  144.9, 134.7, 133.0, 130.8, 129.9, 127.9, 127.8, 127.0, 122.9, 120.2, 85.9, 64.3, 54.5, 21.7; **HRMS** (ESI):  $m/z$   $[\text{M} + \text{Na}]^+$  calcd. for  $\text{C}_{16}\text{H}_{15}\text{NNaO}_2\text{S}_2^+$ : 340.0436; found: 340.0440.



### 3 References

- 1 A. Coste, G. Karthikeyan, F. Couty and G. Evano, Copper-Mediated Coupling of 1,1-Dibromo-1-alkenes with Nitrogen Nucleophiles: A General Method for the Synthesis of Ynamides, *Angew. Chemie*, 2009, **121**, 4445–4449.
- 2 D. P. Zimin, D. V. Dar'in, V. Yu. Kukushkin and A. Yu. Dubovtsev, Oxygen Atom Transfer as Key To Reverse Regioselectivity in the Gold(I)-Catalyzed Generation of Aminooxazoles from Ynamides, *J. Org. Chem.*, 2021, **86**, 1748–1757.
- 3 A. Y. Dubovtsev, N. V Shcherbakov, D. V Dar'in and V. Y. Kukushkin, The Dichotomy of Gold-catalyzed Interplay between Cyanamides and Ynamides: Controllable Switch from [2+2+2] to [4+2] Cycloaddition, *Adv. Synth. Catal.*, 2020, **362**, 2672–2682.
- 4 A. Mukherjee, R. B. Dateer, R. Chaudhuri, S. Bhunia, S. N. Karad and R. S. Liu, Gold-catalyzed 1,2-difunctionalizations of aminoalkynes using only N- and O-containing oxidants, *J. Am. Chem. Soc.*, 2011, **133**, 15372–15375.
- 5 C. F. Xu, M. Xu, Y. X. Jia and C. Y. Li, Gold-catalyzed synthesis of benzil derivatives and  $\alpha$ -keto imides via oxidation of alkynes, *Org. Lett.*, 2011, **13**, 1556–1559.
- 6 K. Jouvin, A. Coste, A. Bayle, F. Legrand, G. Karthikeyan, K. Tadiparthi and G. Evano, Copper-Mediated Selective Cross-Coupling of 1,1-Dibromo-1-alkenes and Heteronucleophiles: Development of General Routes to Heterosubstituted Alkynes and Alkenes, *Organometallics*, 2012, **31**, 7933–7947.
- 7 L. Zhu, Y. Yu, Z. Mao and X. Huang, Gold-Catalyzed Intermolecular Nitrene Transfer from 2H-Azirines to Ynamides: A Direct Approach to Polysubstituted Pyrroles, *Org. Lett.*, 2014, **17**, 30–33.

## 4 NMR Spectra

$^1\text{H}$  NMR (400 MHz,  $\text{CDCl}_3$ ) of **3a**

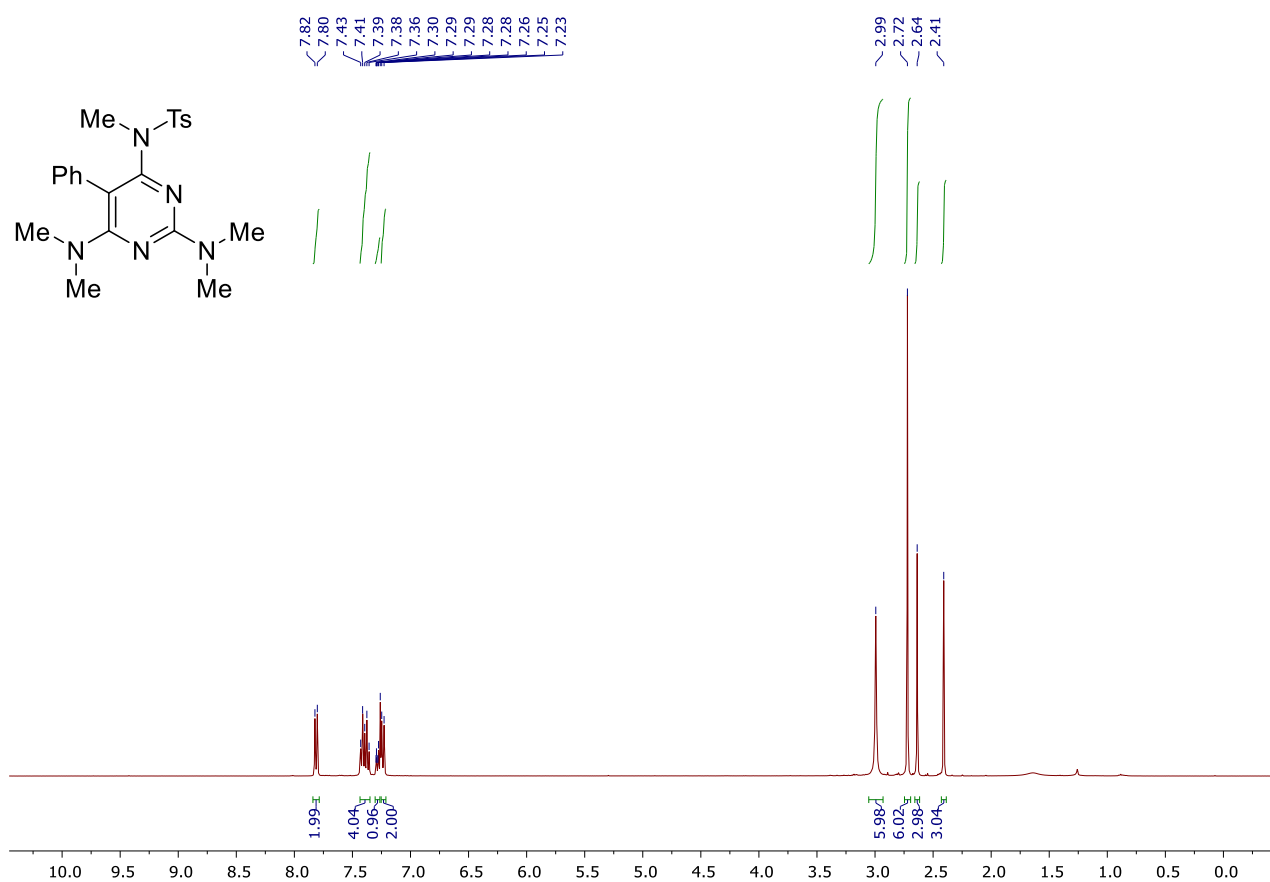

$^{13}\text{C}\{^1\text{H}\}$  NMR (100 MHz,  $\text{CDCl}_3$ ) of **3a**

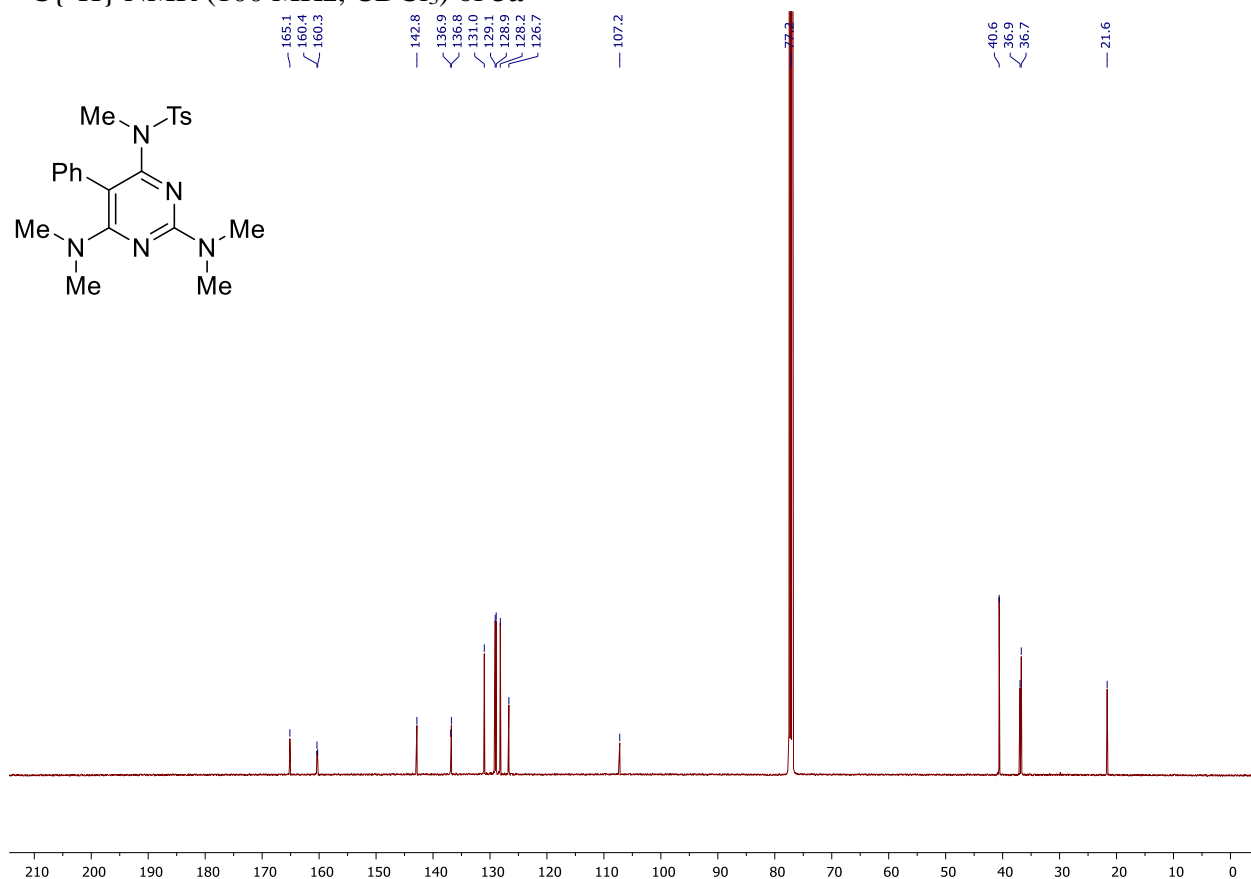

$^1\text{H}$  NMR (400 MHz,  $\text{CDCl}_3$ ) of **3b**

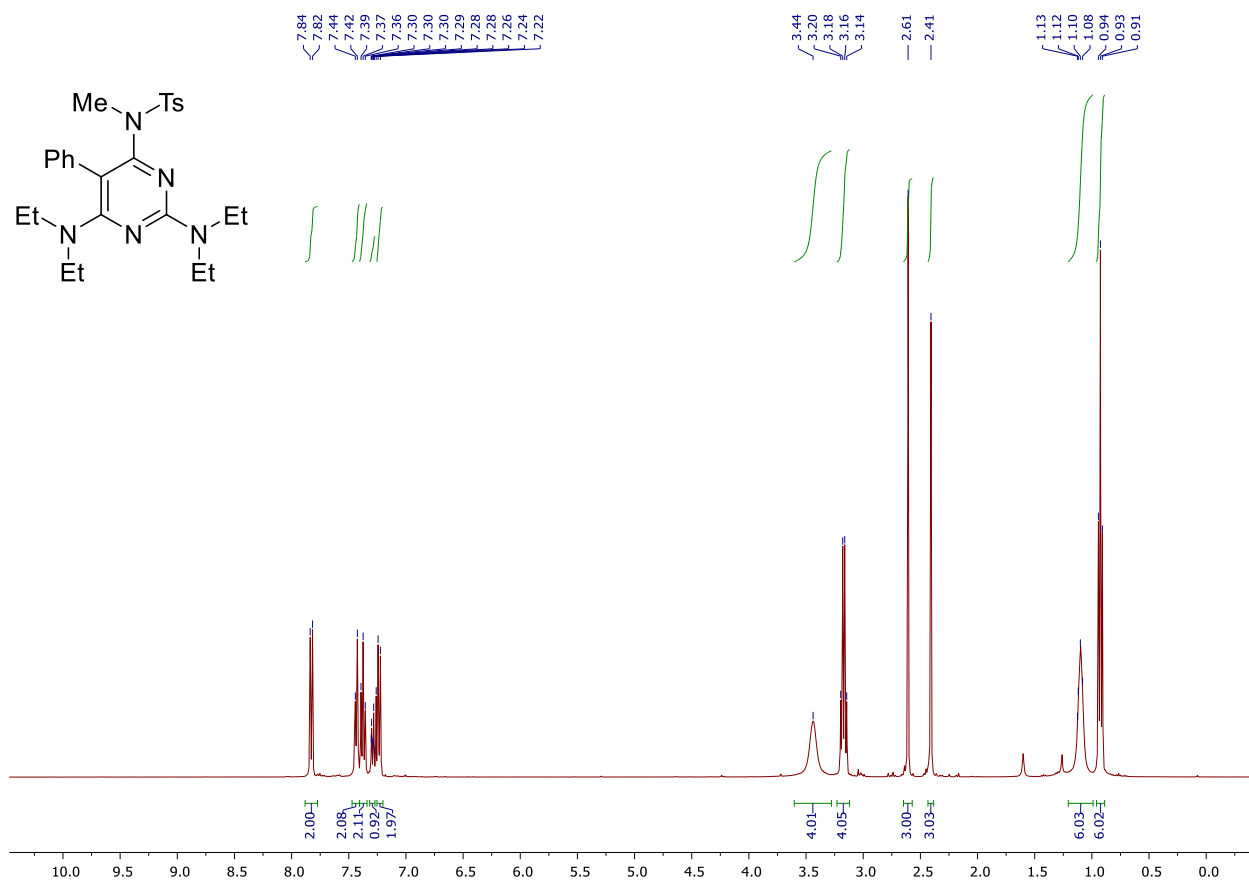

$^{13}\text{C}\{^1\text{H}\}$  NMR (100 MHz,  $\text{CDCl}_3$ ) of **3b**

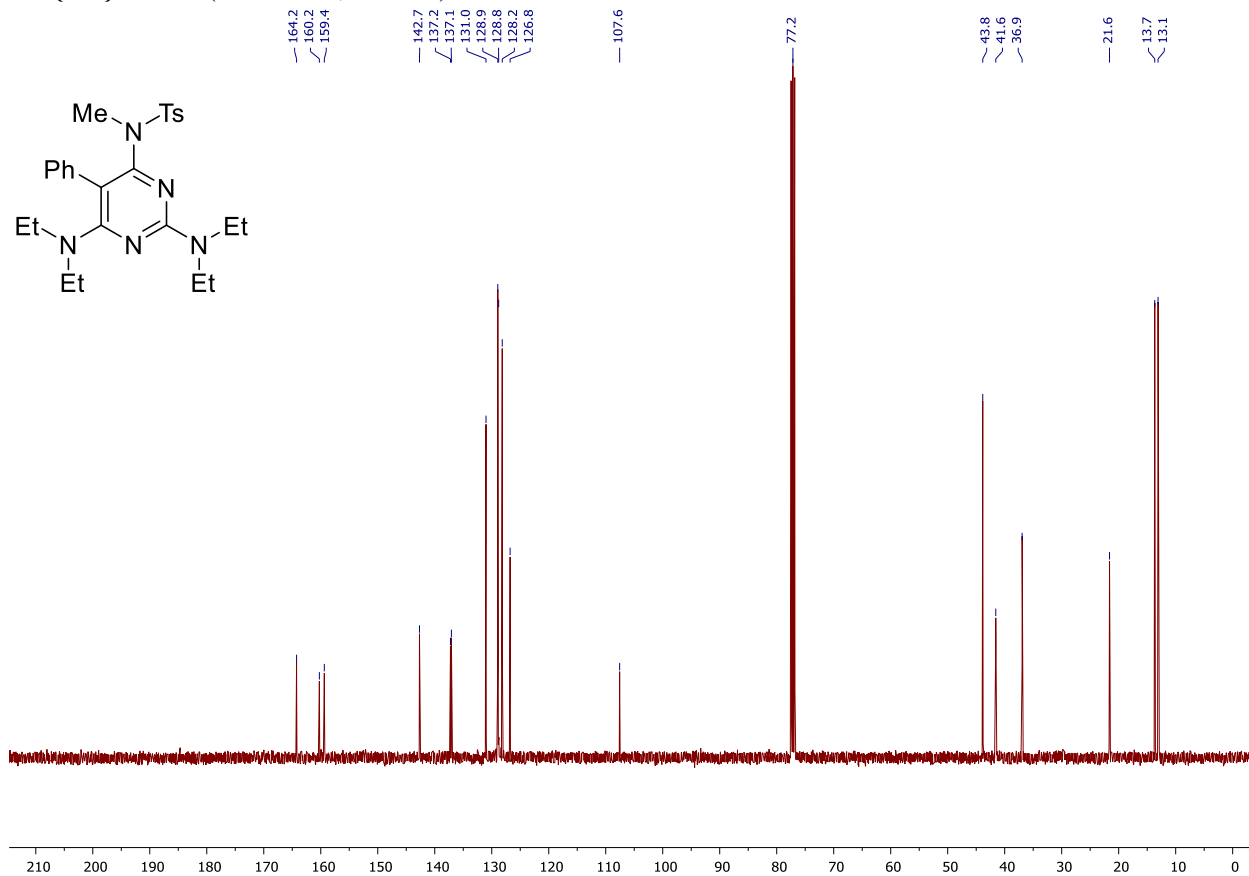

$^1\text{H}$  NMR (400 MHz,  $\text{CDCl}_3$ ) of **3c**

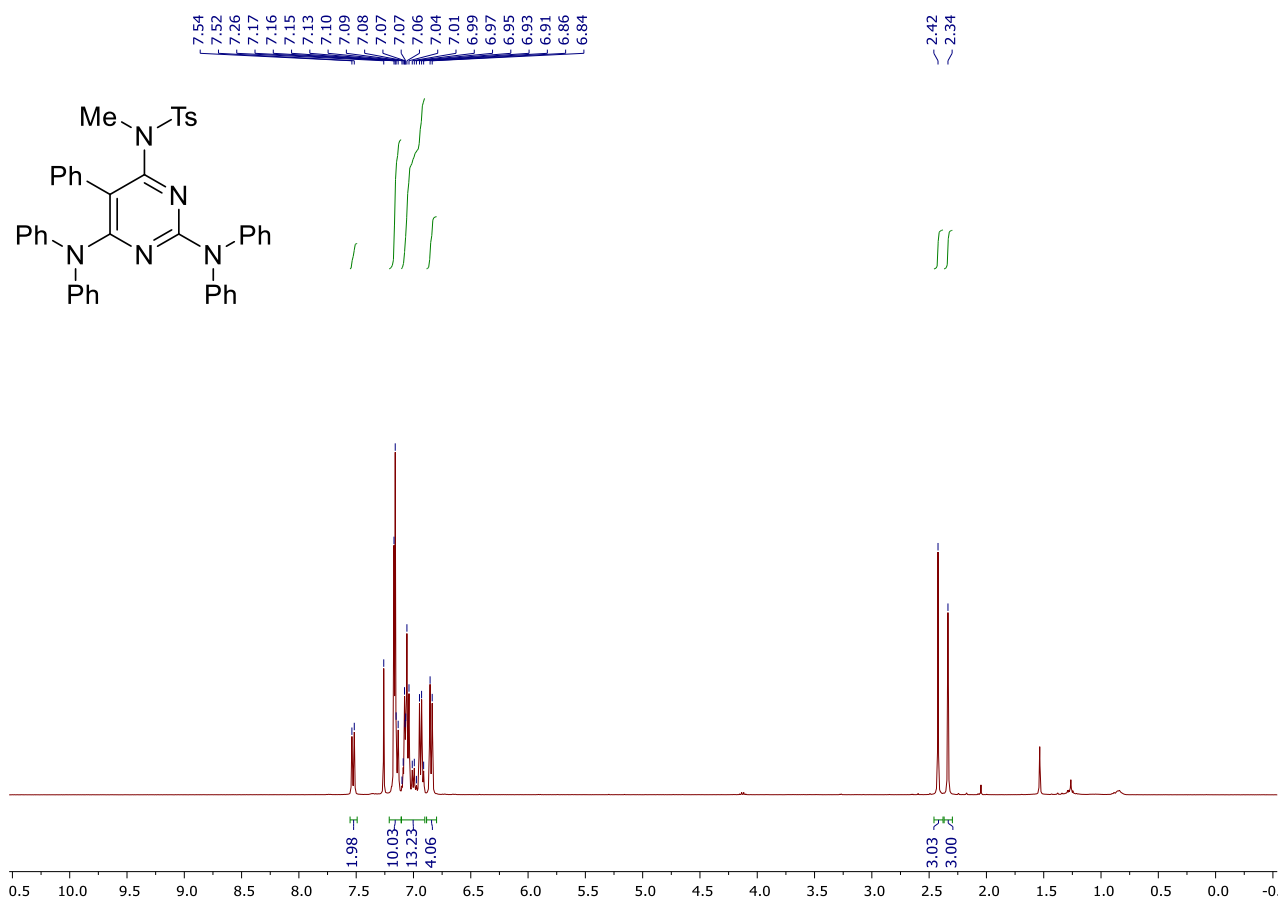

$^{13}\text{C}\{^1\text{H}\}$  NMR (100 MHz,  $\text{CDCl}_3$ ) of **3c**

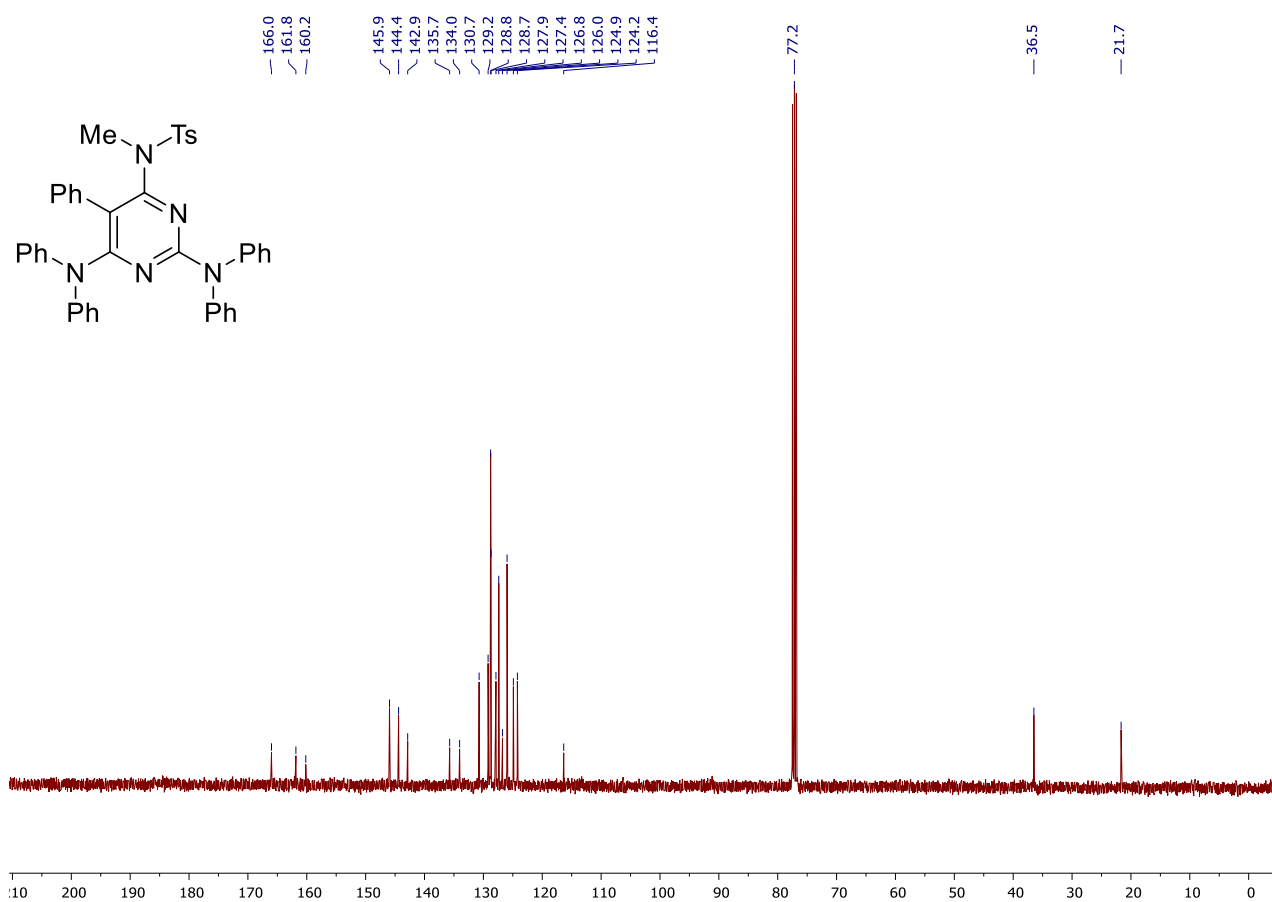

$^1\text{H}$  NMR (400 MHz,  $\text{CDCl}_3$ ) of **3d**

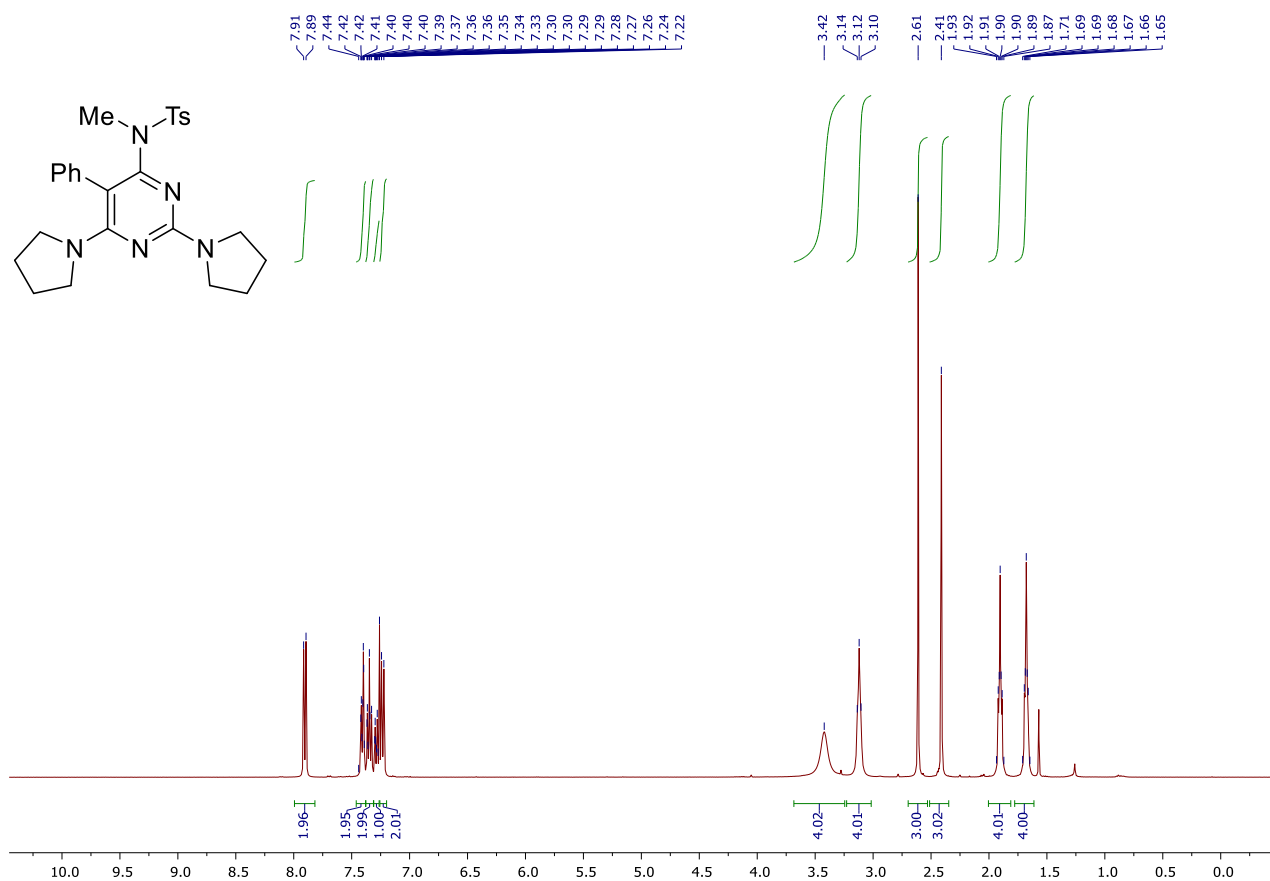

$^{13}\text{C}\{^1\text{H}\}$  NMR (100 MHz,  $\text{CDCl}_3$ ) of **3d**

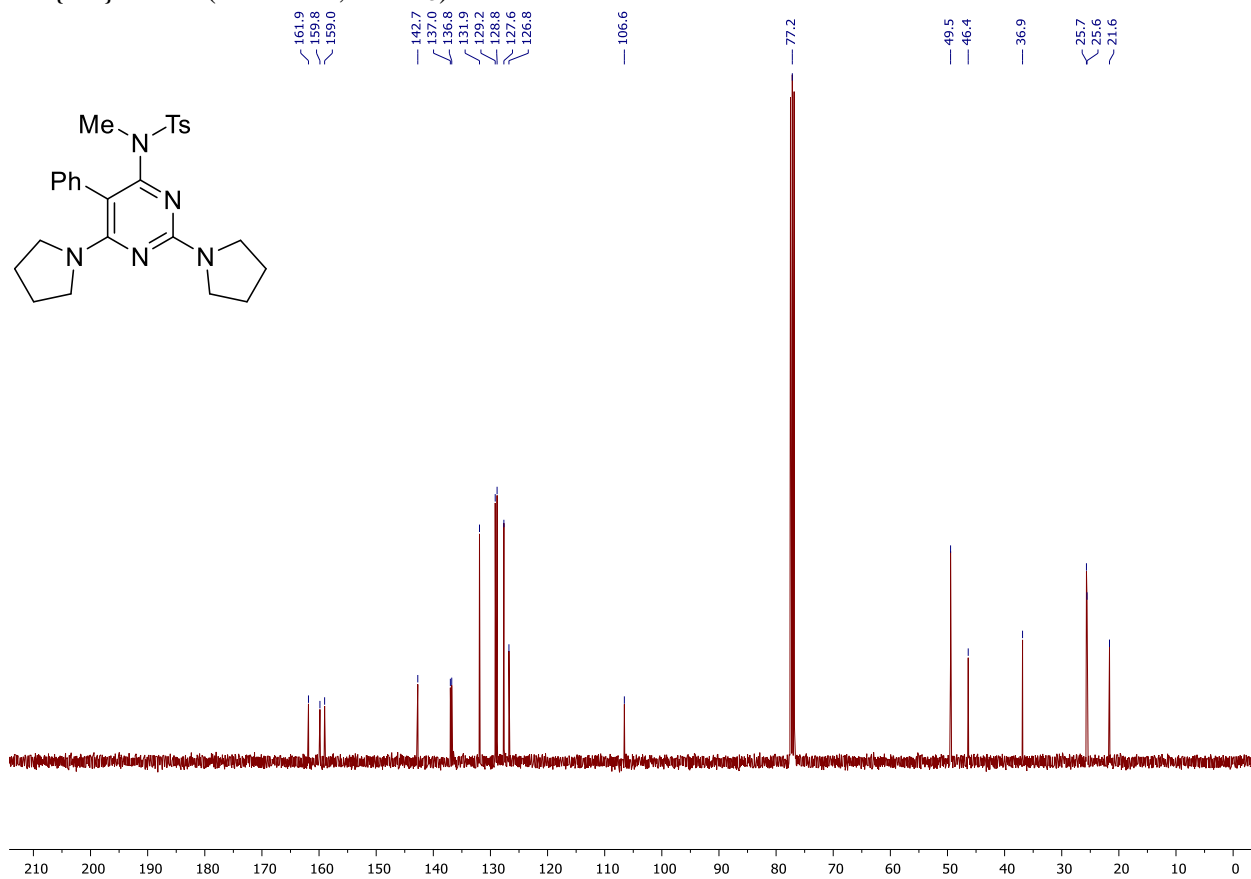

$^1\text{H}$  NMR (400 MHz,  $\text{DMSO-}d_6$ ) of **3e**

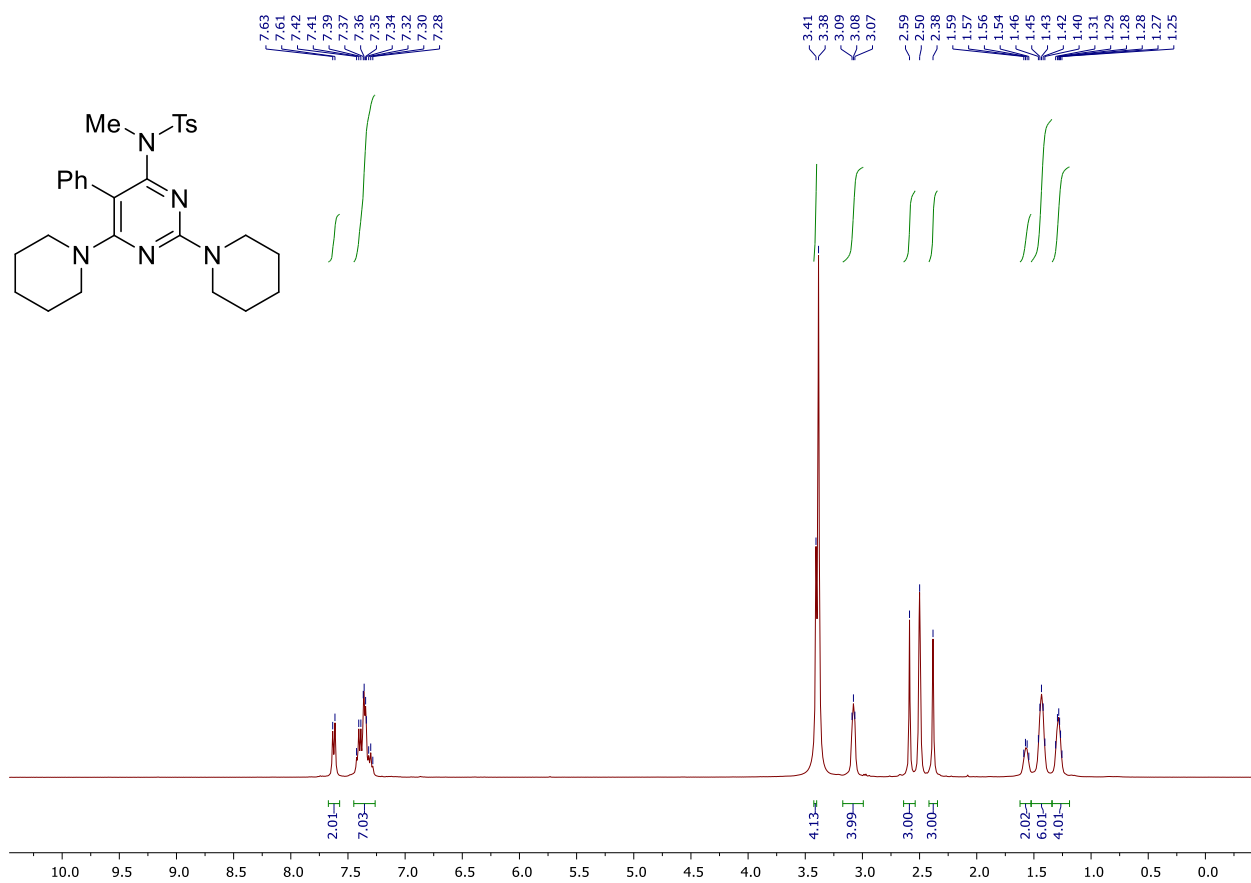

$^{13}\text{C}\{^1\text{H}\}$  NMR (100 MHz,  $\text{CDCl}_3$ ) of **3e**

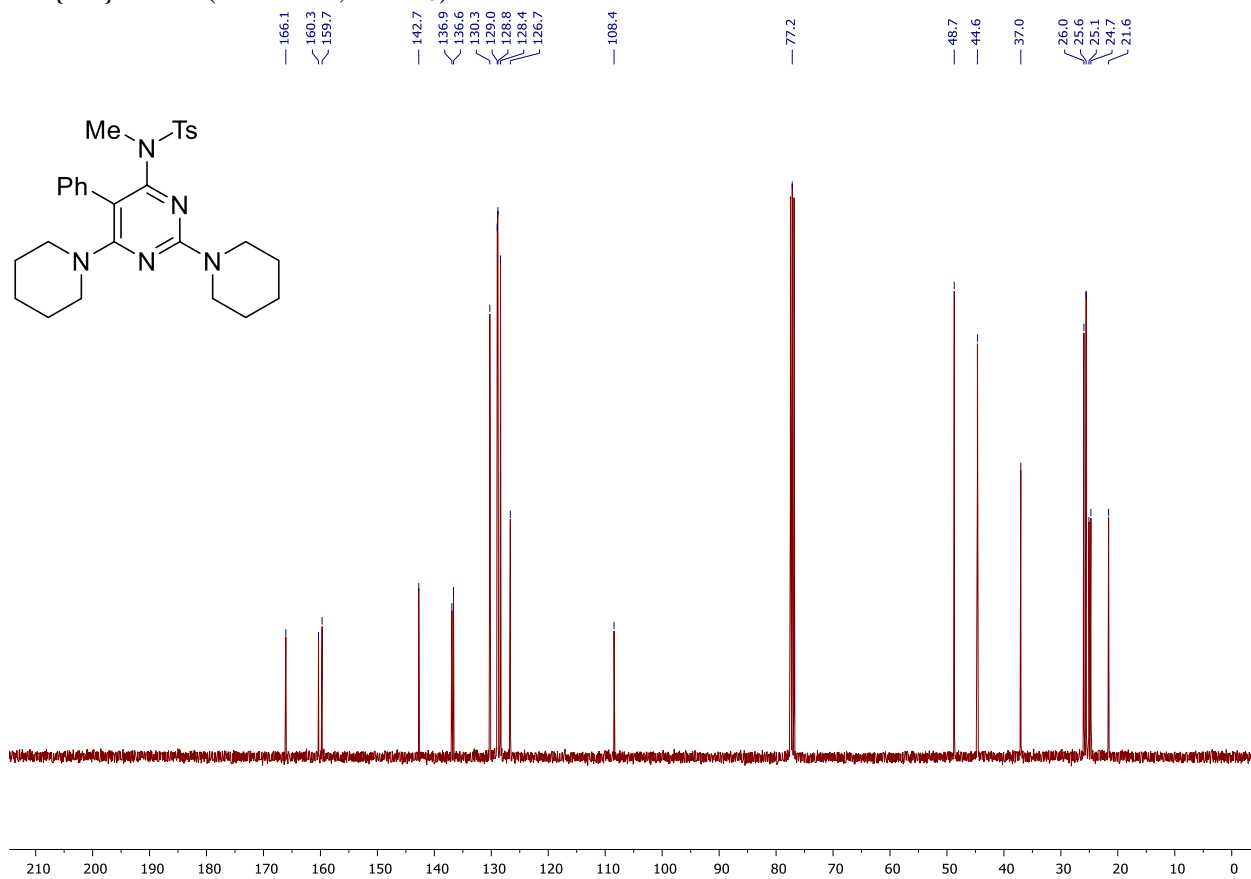

$^1\text{H}$  NMR (400 MHz,  $\text{CDCl}_3$ ) of **3f**

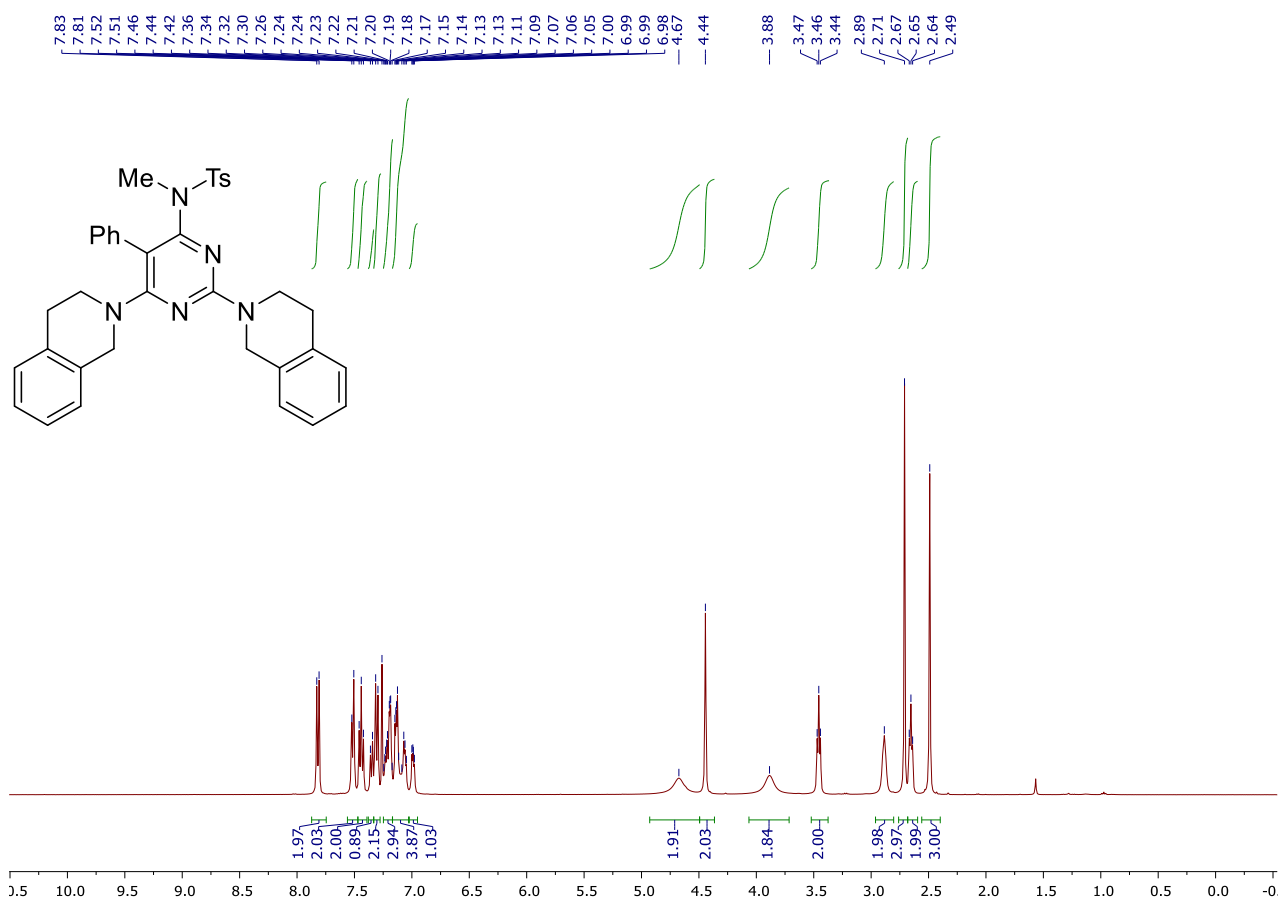

$^{13}\text{C}\{^1\text{H}\}$  NMR (100 MHz,  $\text{CDCl}_3$ ) of **3f**

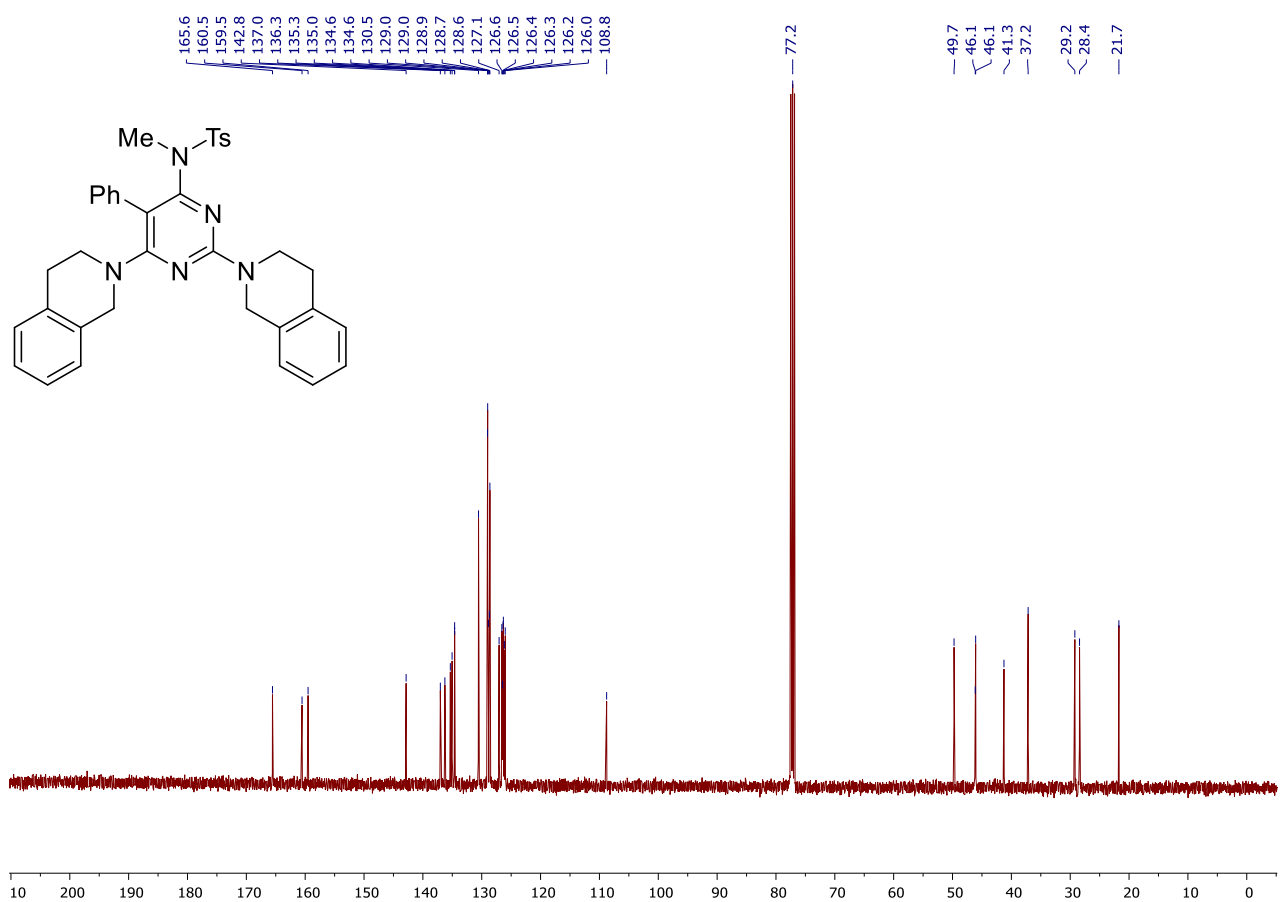

$^1\text{H}$  NMR (400 MHz,  $\text{CDCl}_3$ ) of **3g**

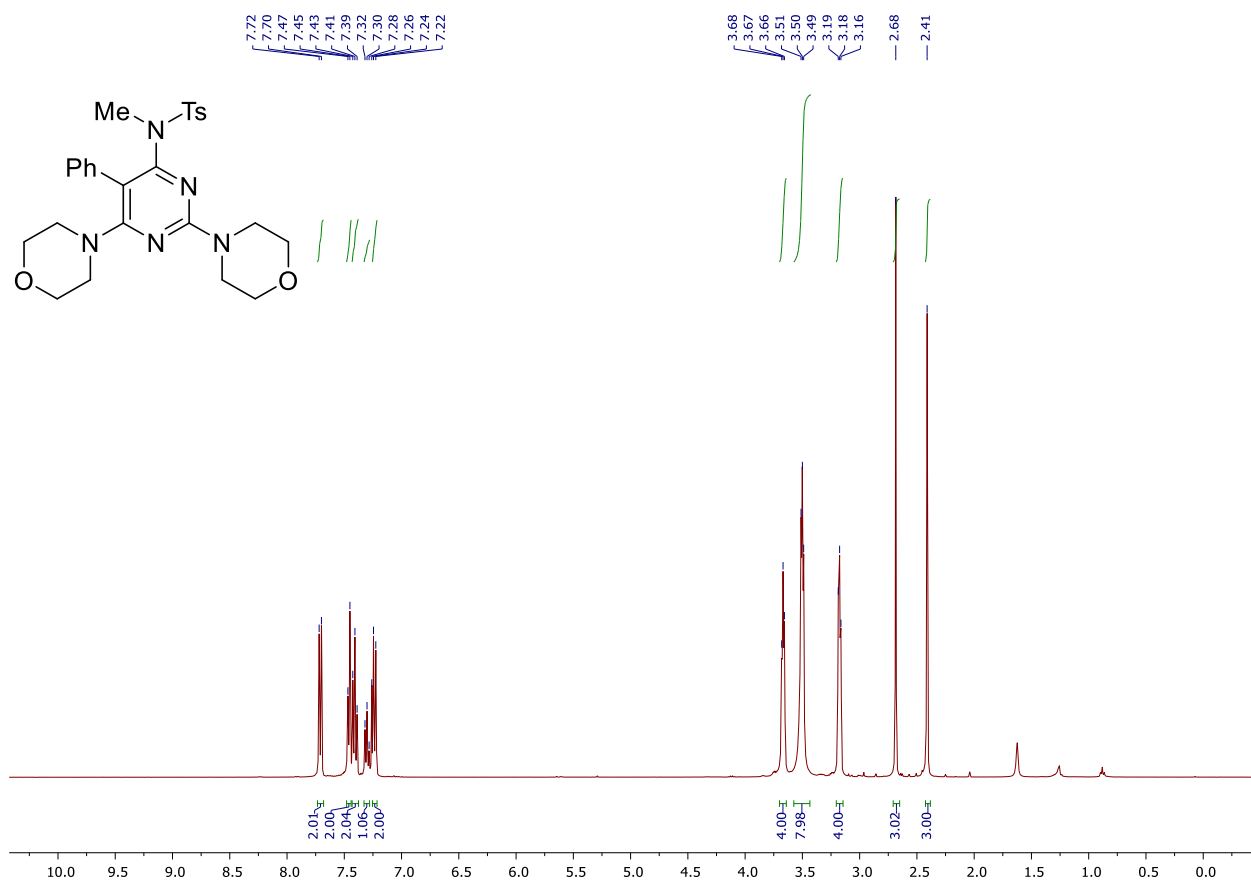

$^{13}\text{C}\{^1\text{H}\}$  NMR (100 MHz,  $\text{CDCl}_3$ ) of **3g**

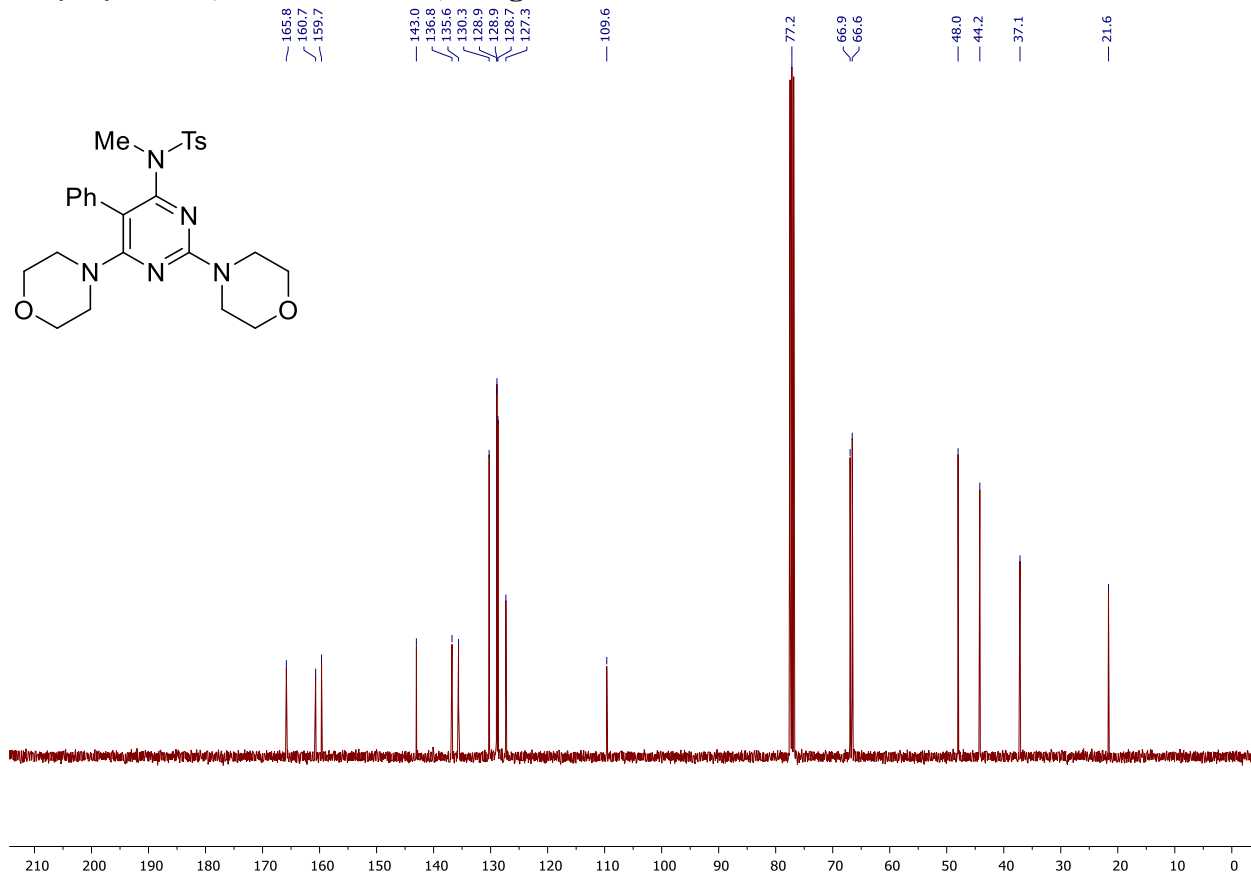



$^1\text{H}$  NMR (400 MHz,  $\text{CDCl}_3$ ) of **3h**

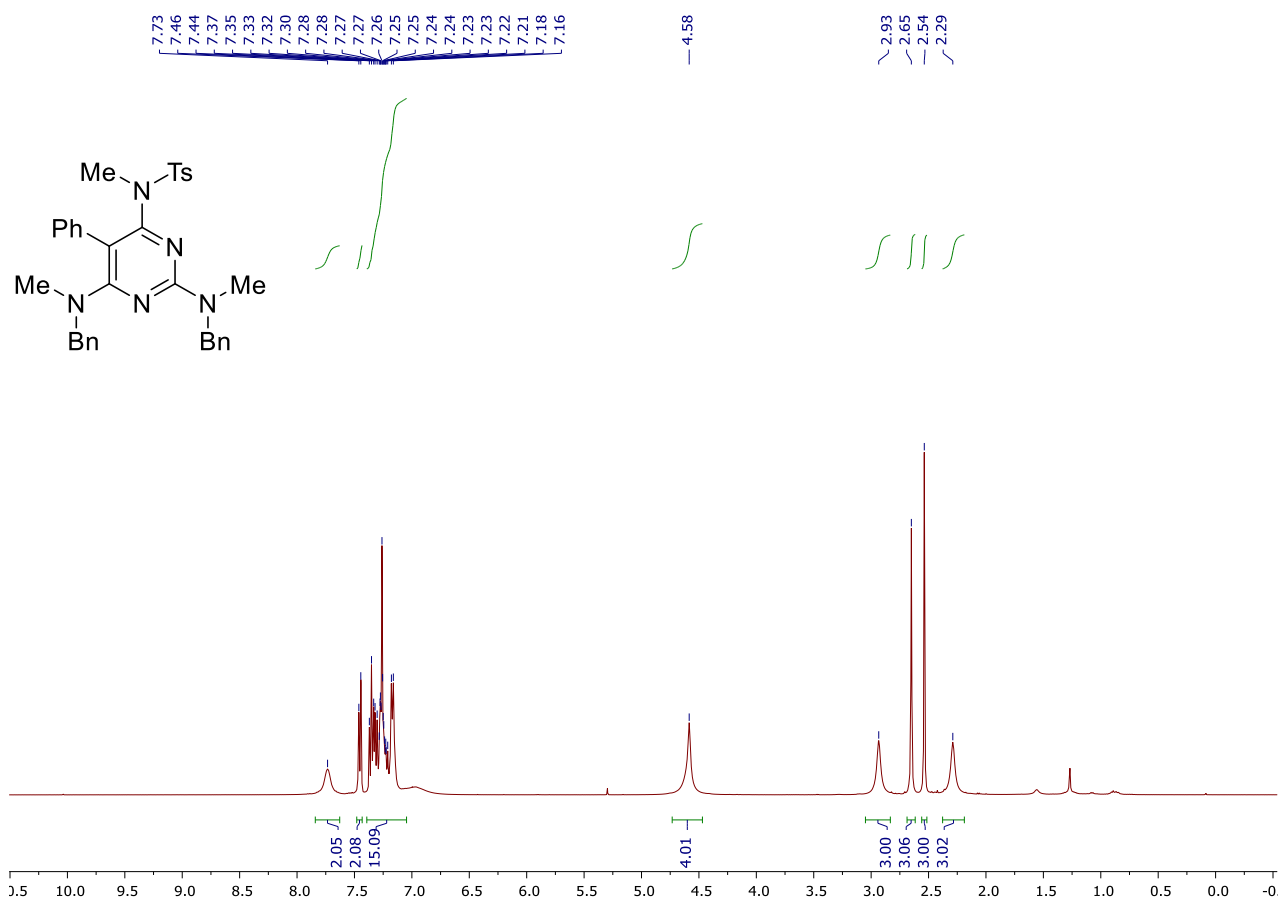

$^{13}\text{C}\{^1\text{H}\}$  NMR (100 MHz,  $\text{CDCl}_3$ ) of **3h**

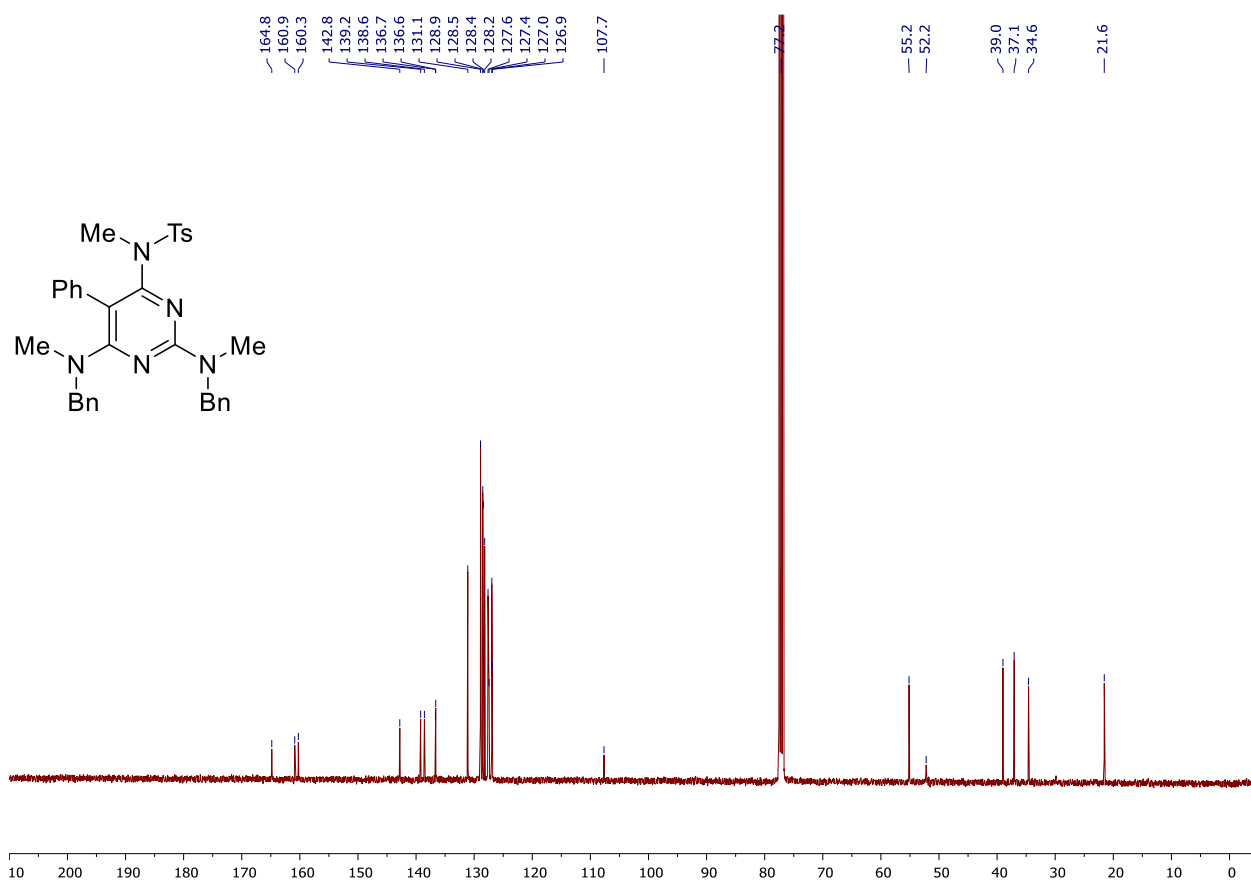

$^1\text{H}$  NMR (400 MHz,  $\text{CDCl}_3$ ) of **3i**

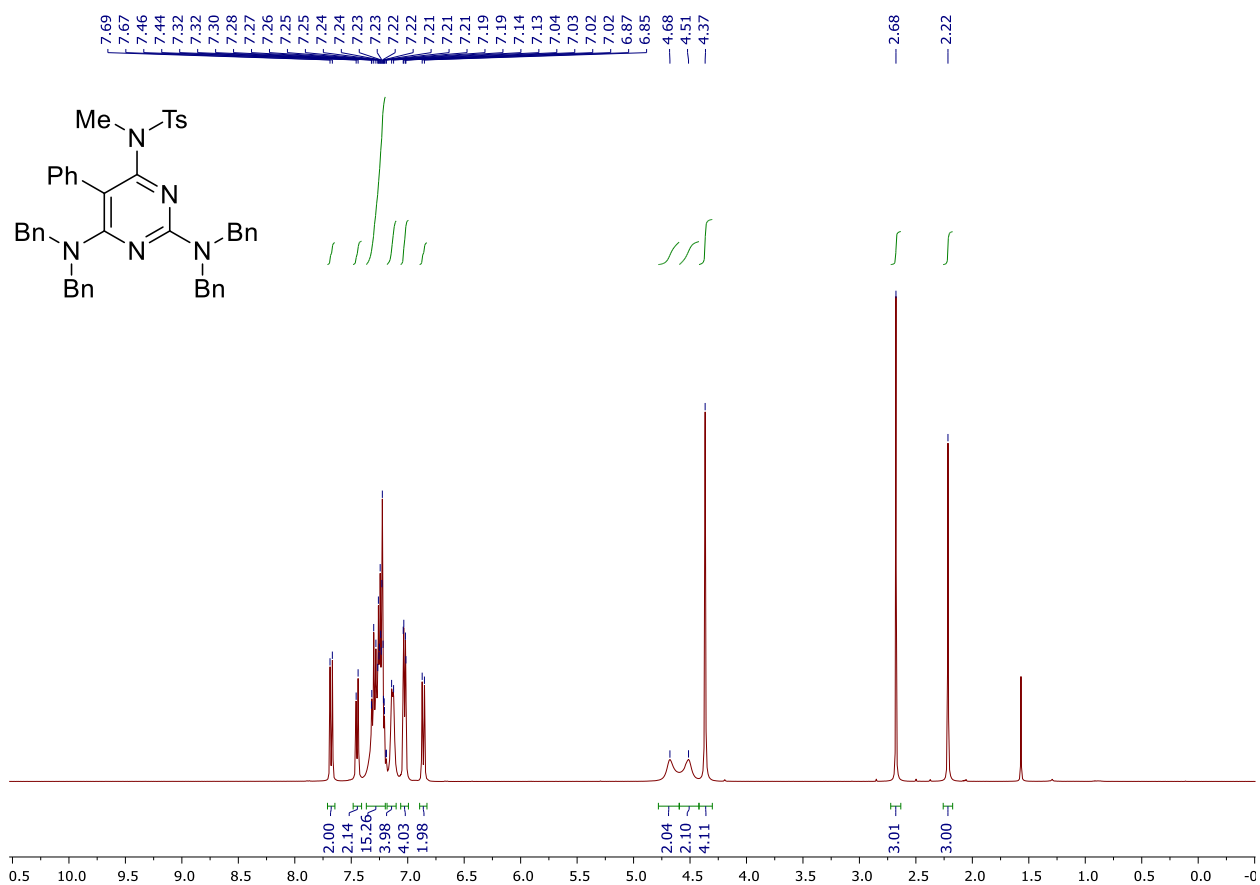

$^{13}\text{C}\{^1\text{H}\}$  NMR (100 MHz,  $\text{CDCl}_3$ ) of **3i**

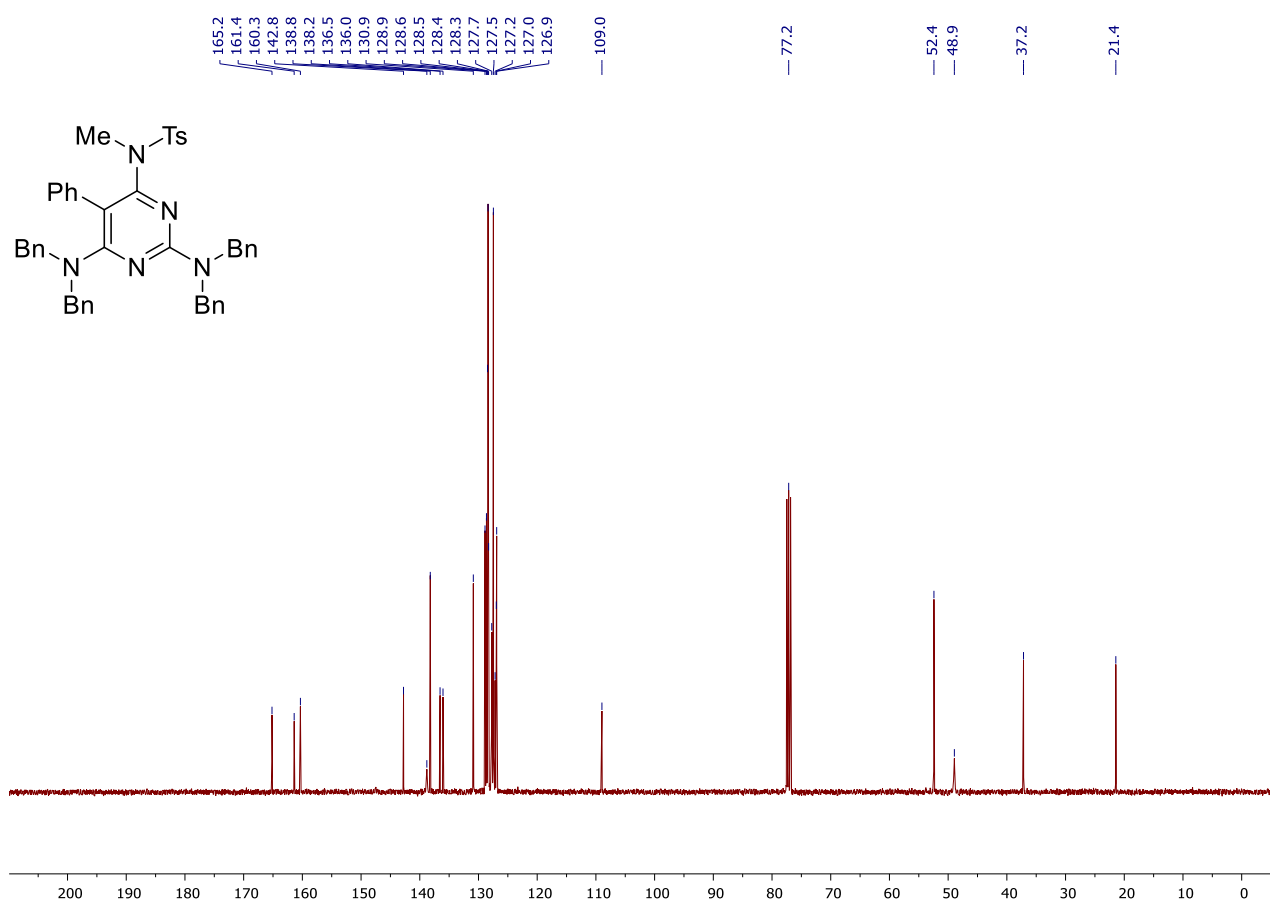

$^1\text{H}$  NMR (400 MHz,  $\text{CDCl}_3$ ) of **6a**

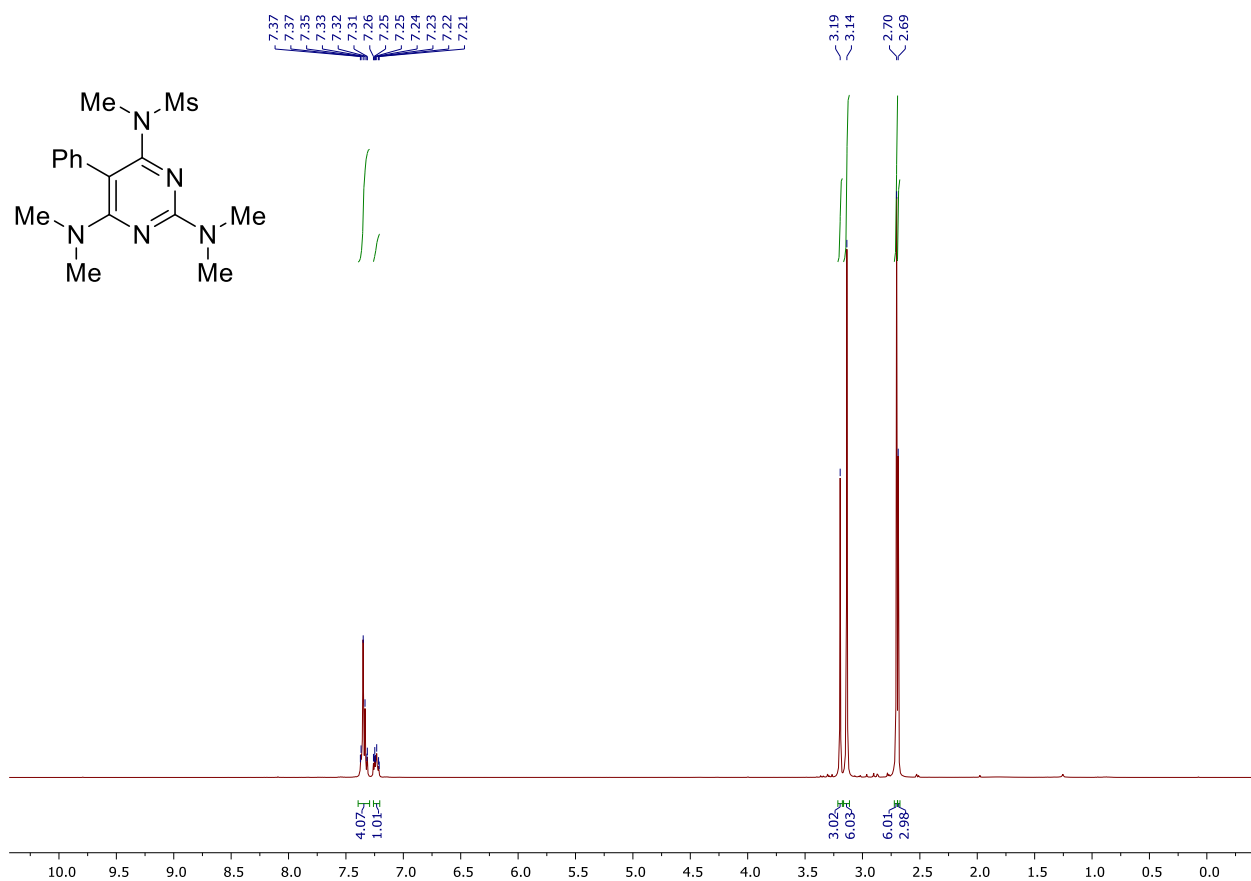

$^{13}\text{C}\{^1\text{H}\}$  NMR (100 MHz,  $\text{CDCl}_3$ ) of **6a**

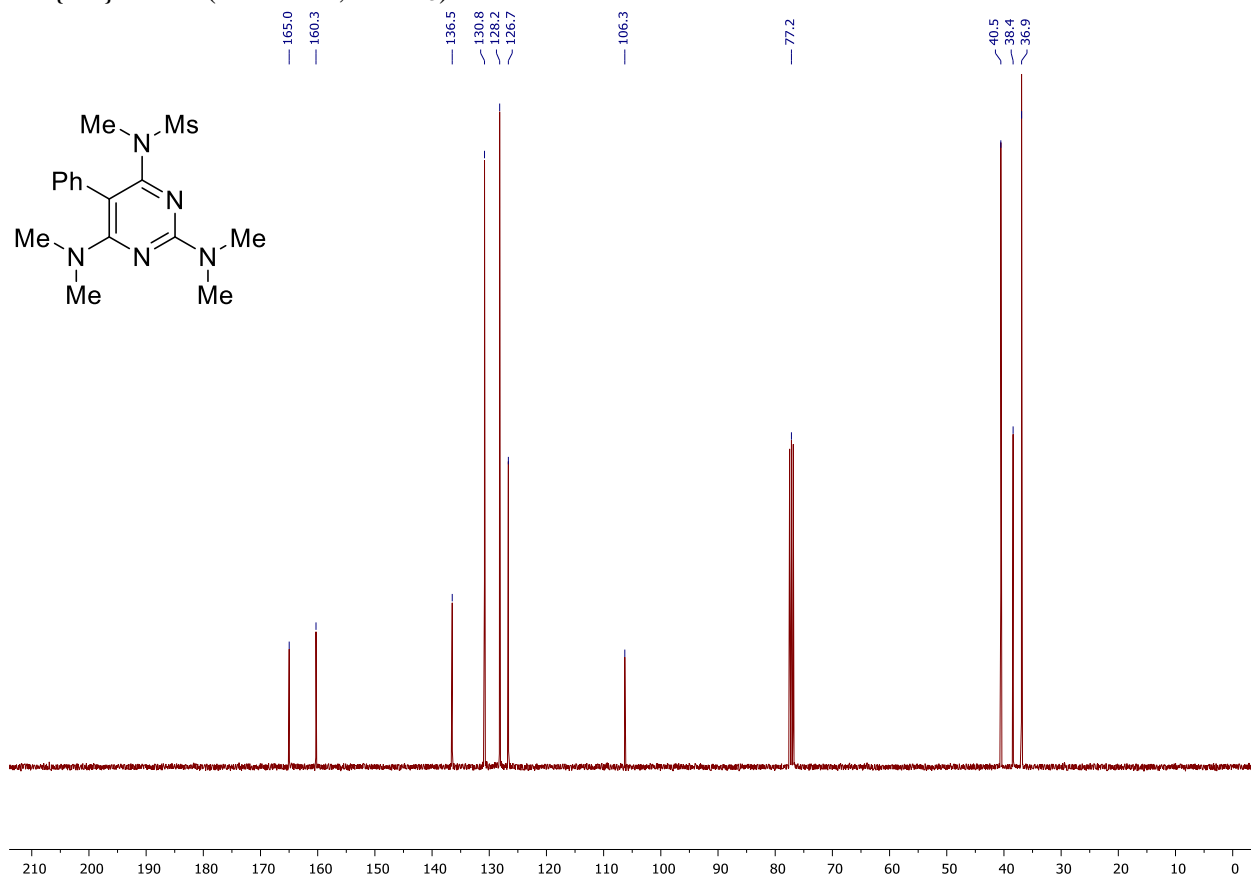

$^1\text{H}$  NMR (400 MHz,  $\text{CDCl}_3$ ) of **6b**

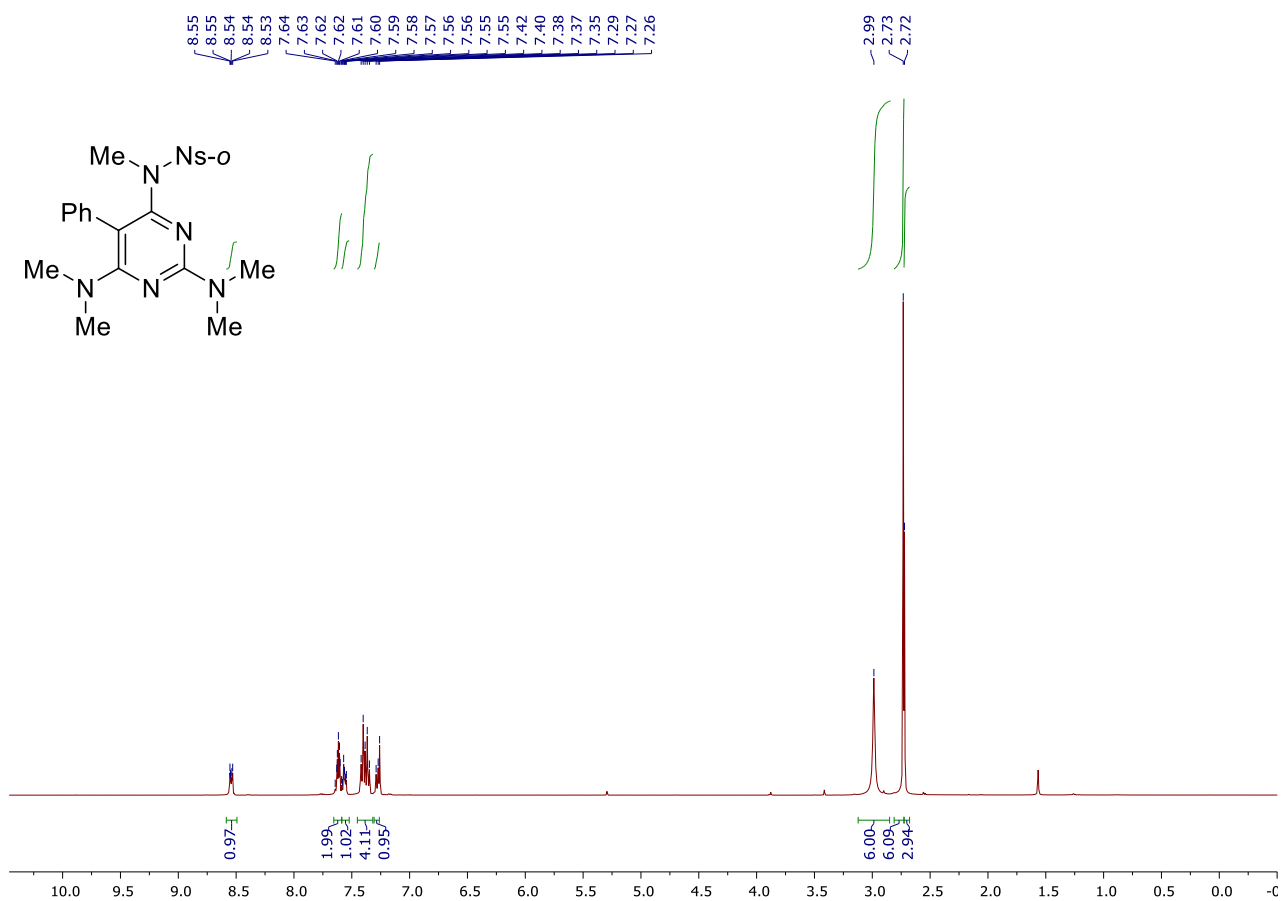

$^{13}\text{C}\{^1\text{H}\}$  NMR (100 MHz,  $\text{CDCl}_3$ ) of **6b**

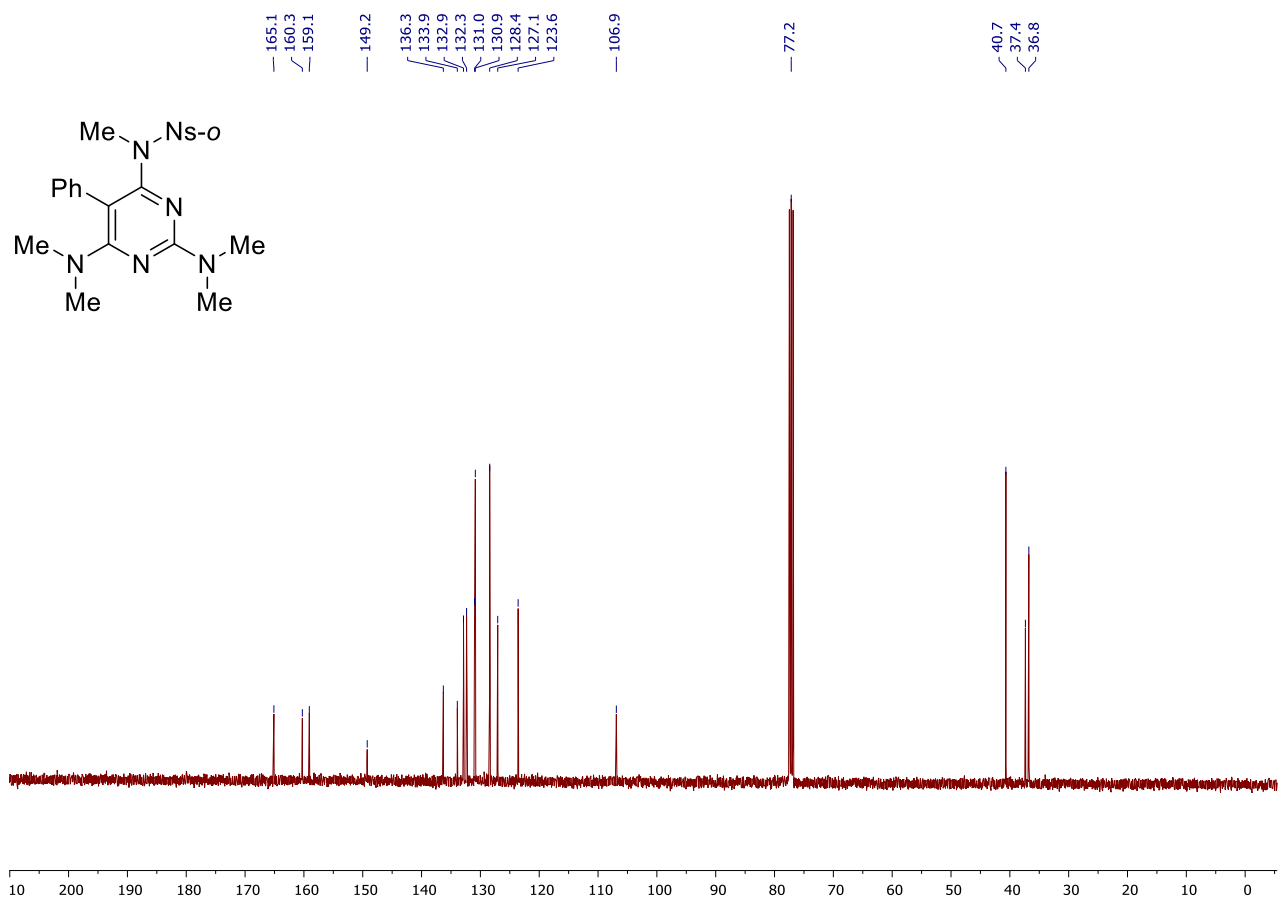

$^1\text{H}$  NMR (400 MHz,  $\text{CDCl}_3$ ) of **6c**

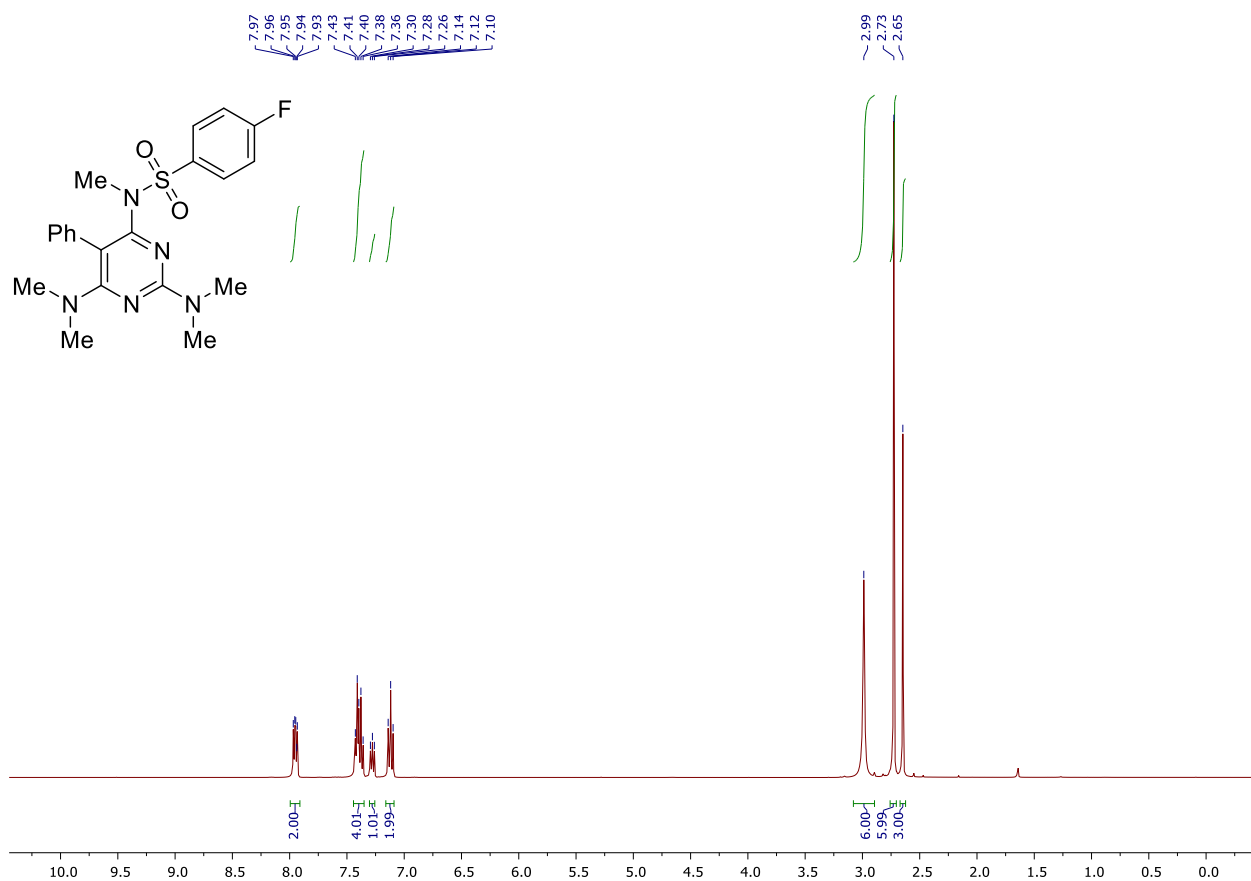

$^{13}\text{C}\{^1\text{H}\}$  NMR (100 MHz,  $\text{CDCl}_3$ ) of **6c**

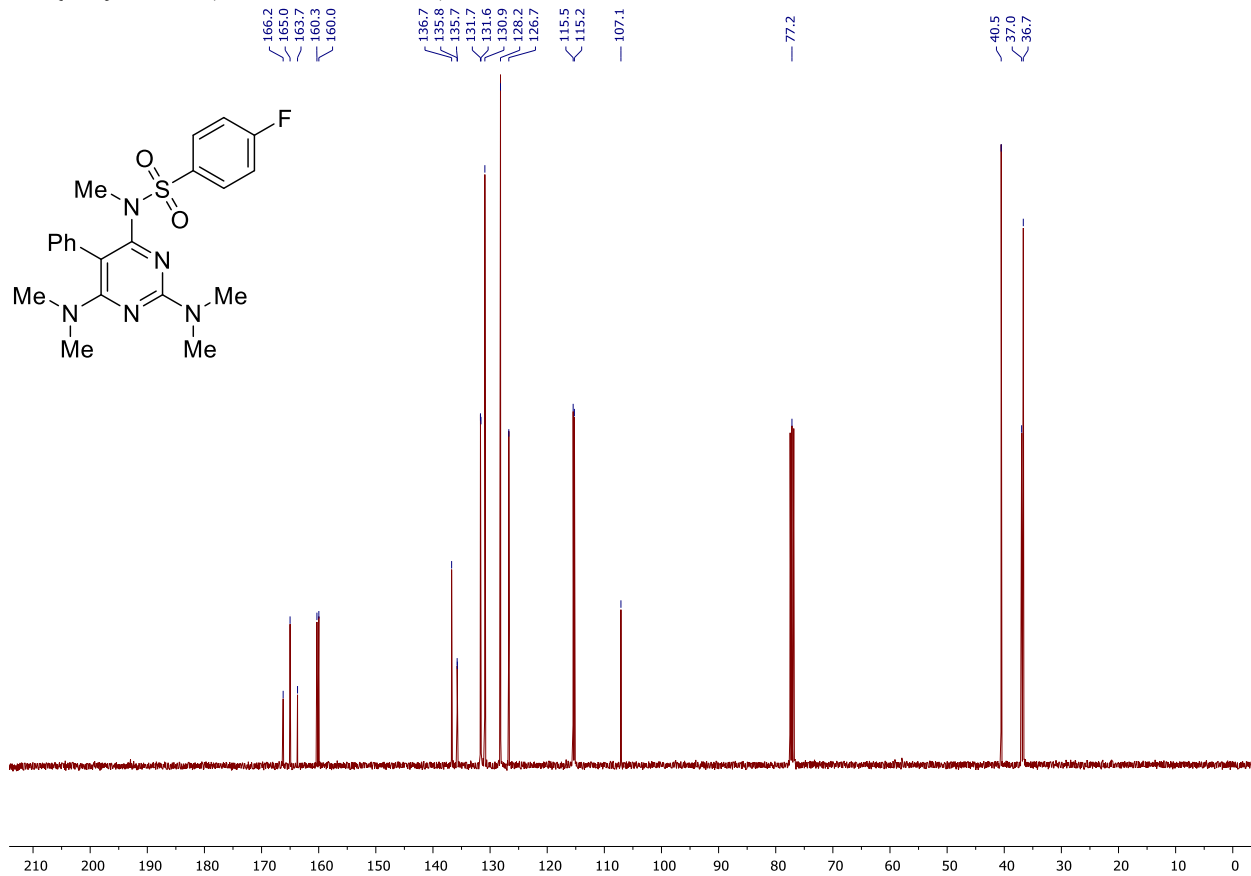

$^1\text{H}$  NMR (400 MHz,  $\text{CDCl}_3$ ) of **6d**

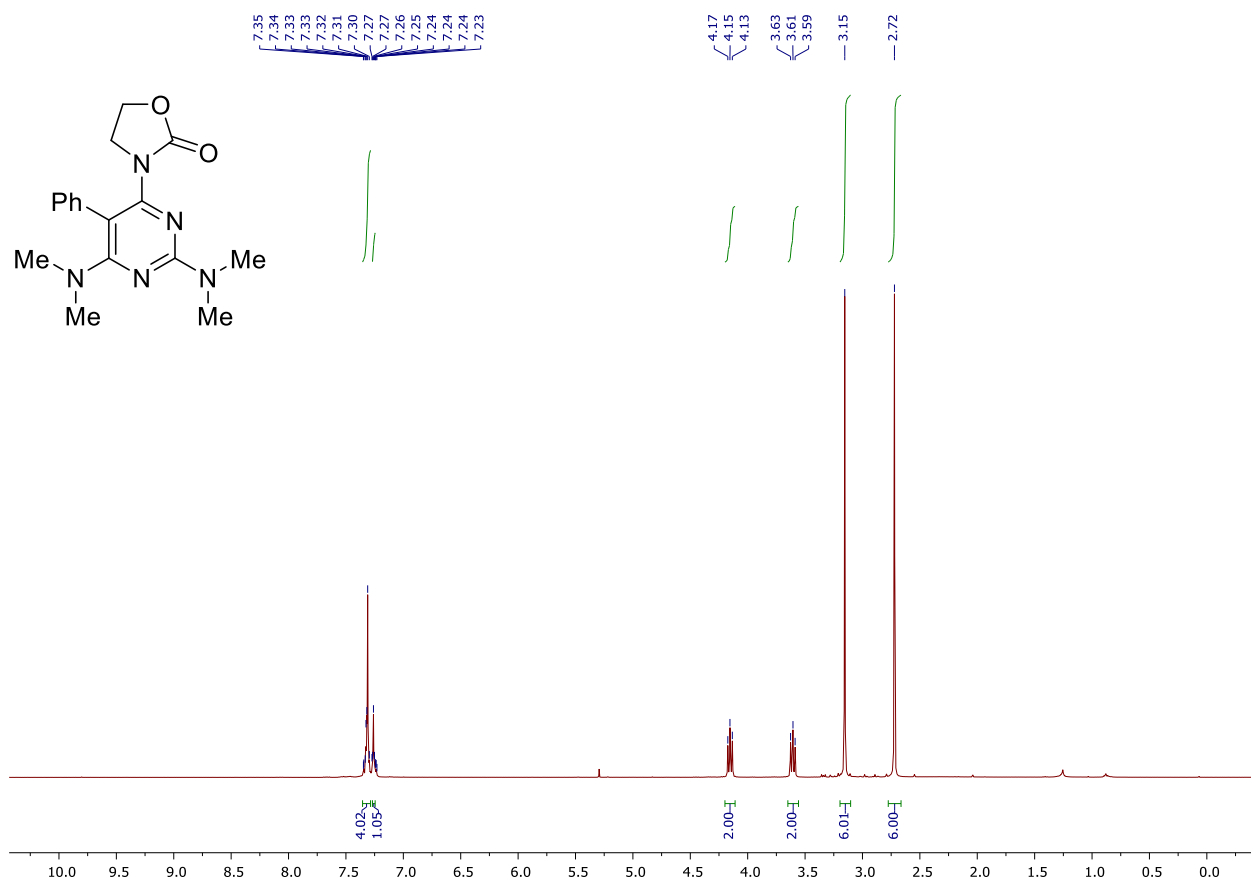

$^{13}\text{C}\{^1\text{H}\}$  NMR (100 MHz,  $\text{CDCl}_3$ ) of **6d**

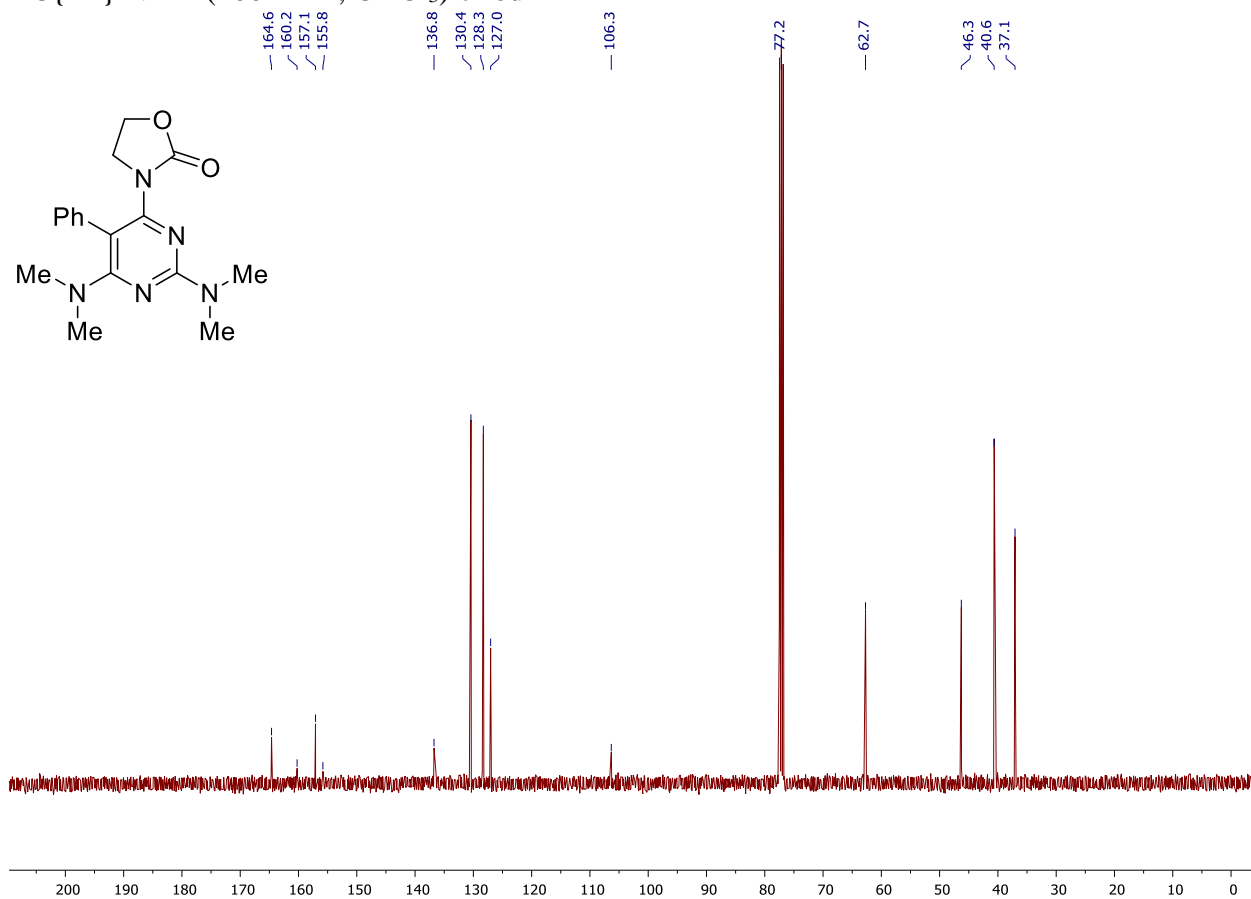

$^1\text{H}$  NMR (400 MHz,  $\text{CDCl}_3$ ) of **6e**

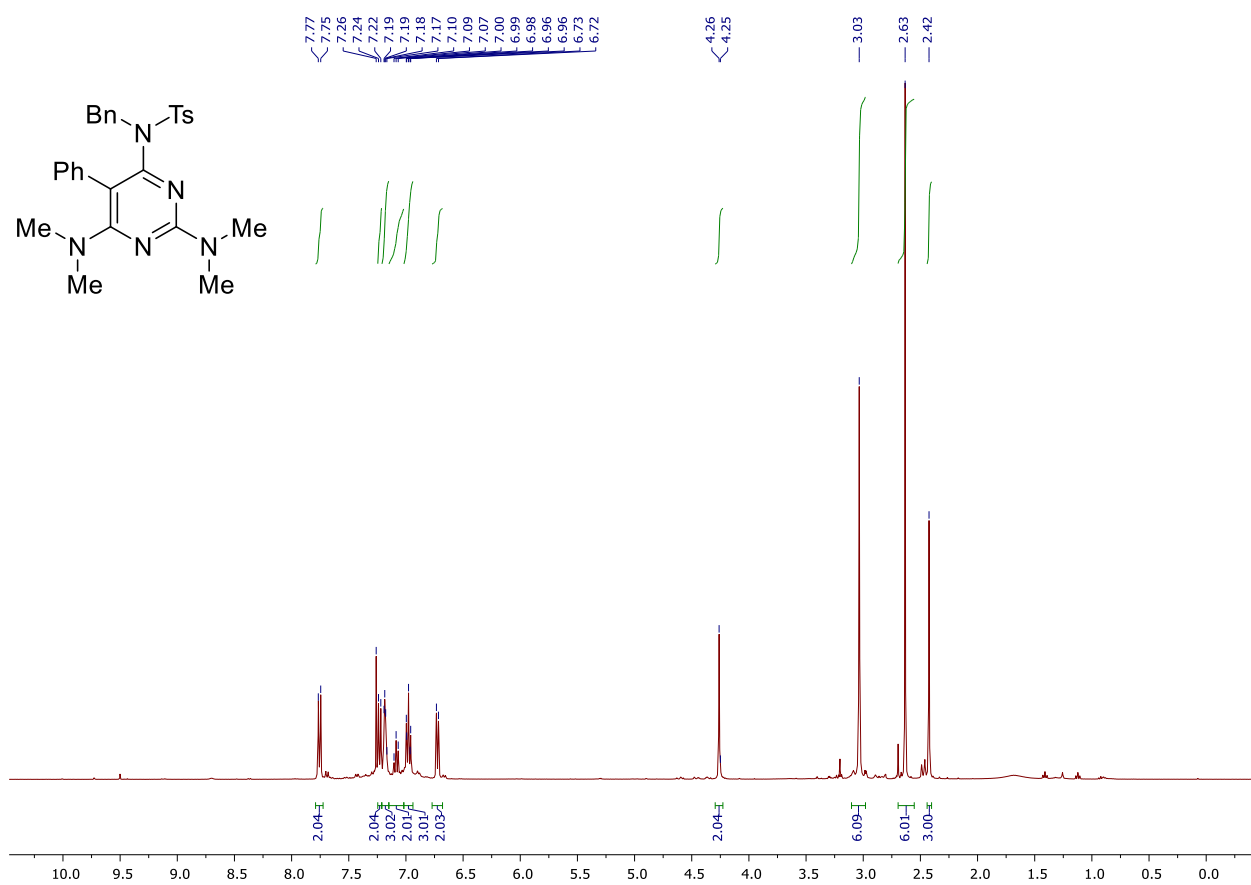

$^{13}\text{C}\{^1\text{H}\}$  NMR (100 MHz,  $\text{CDCl}_3$ ) of **6e**

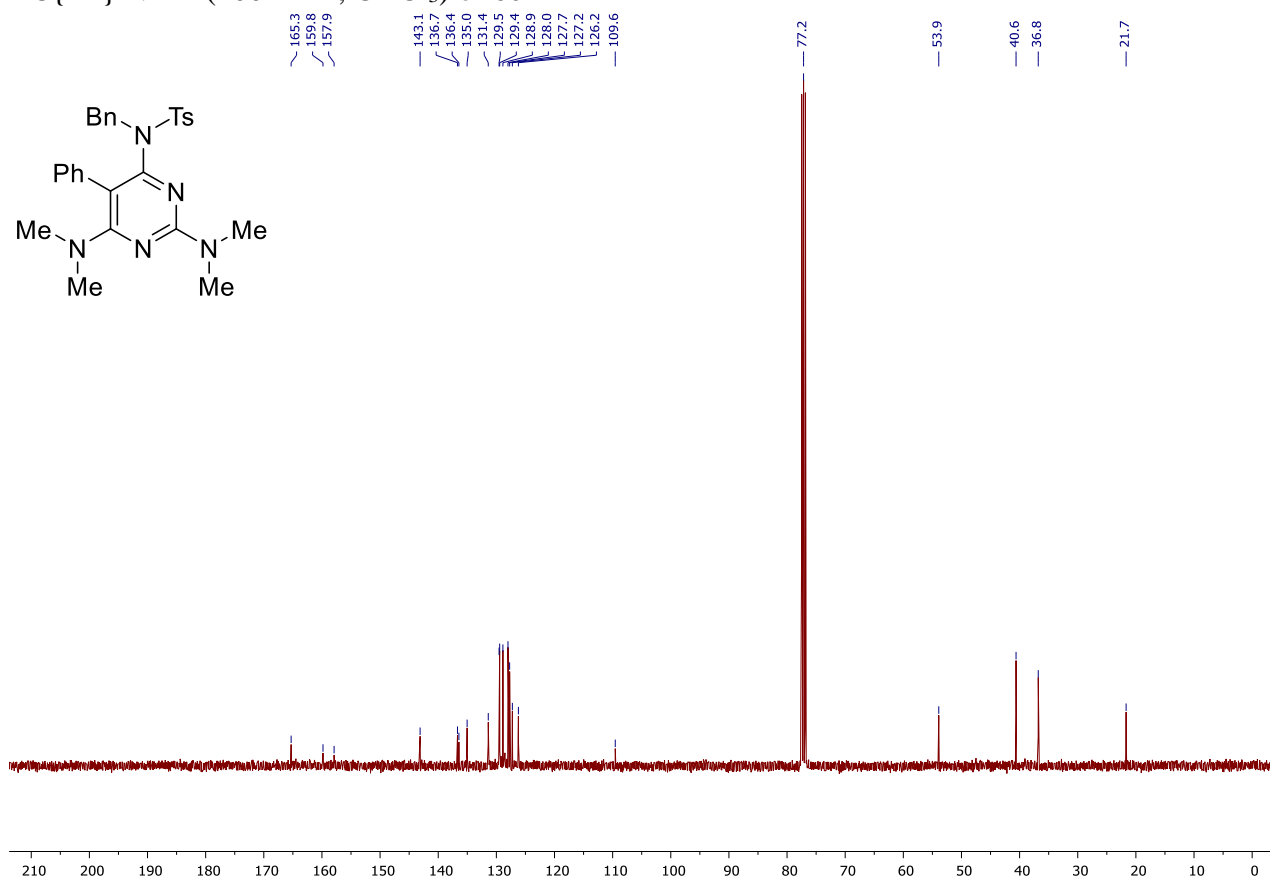

$^1\text{H}$  NMR (400 MHz,  $\text{CDCl}_3$ ) of **6f**

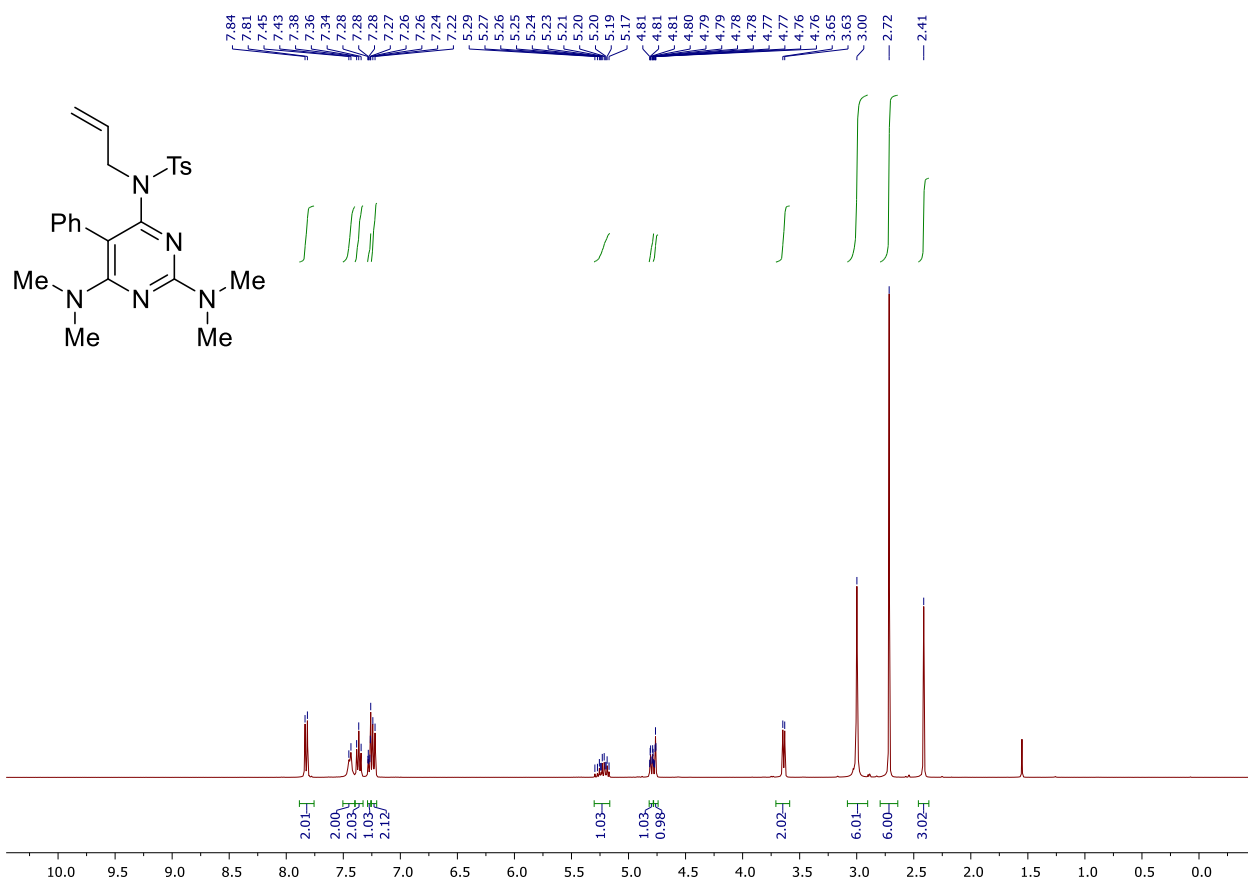

$^{13}\text{C}\{^1\text{H}\}$  NMR (100 MHz,  $\text{CDCl}_3$ ) of **6f**

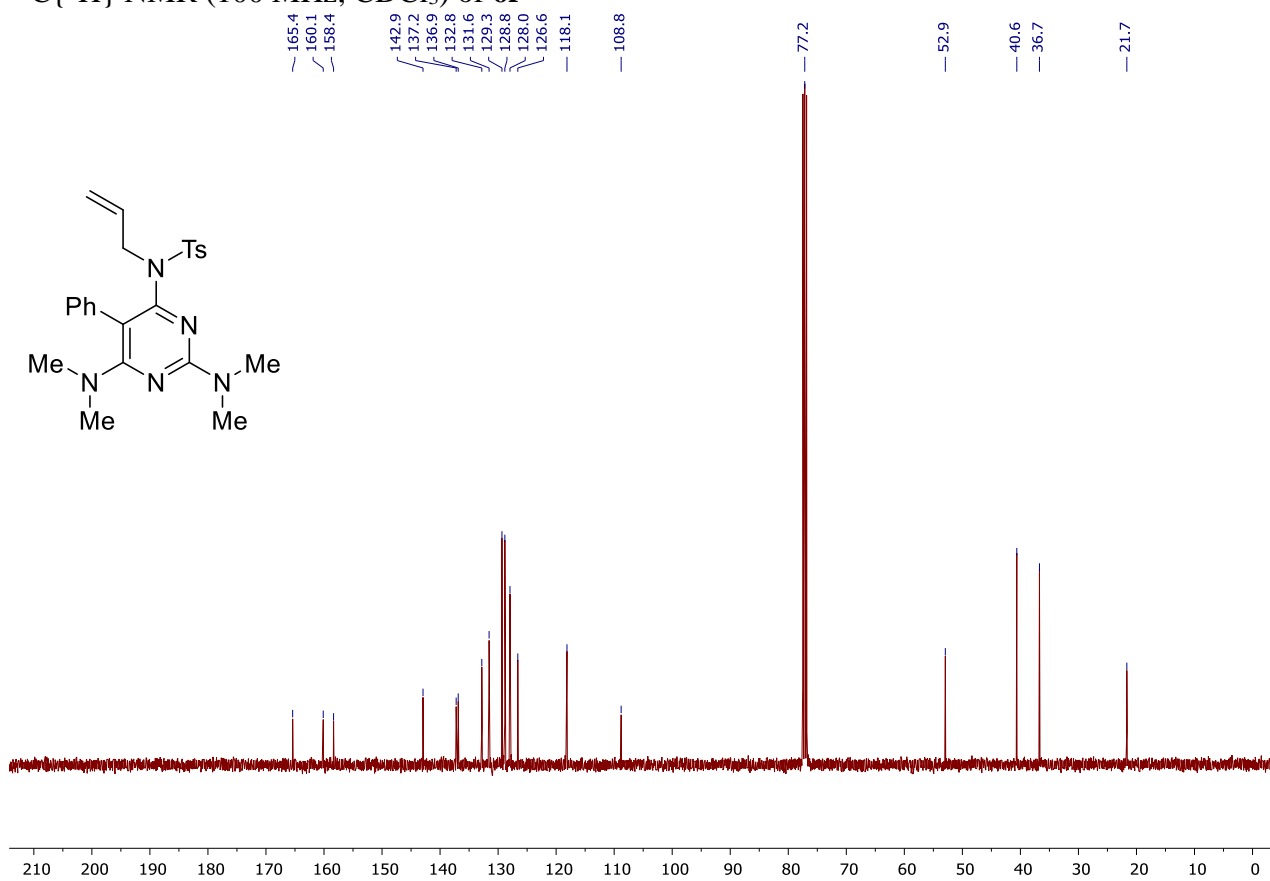



$^1\text{H}$  NMR (400 MHz,  $\text{CDCl}_3$ ) of **6g**

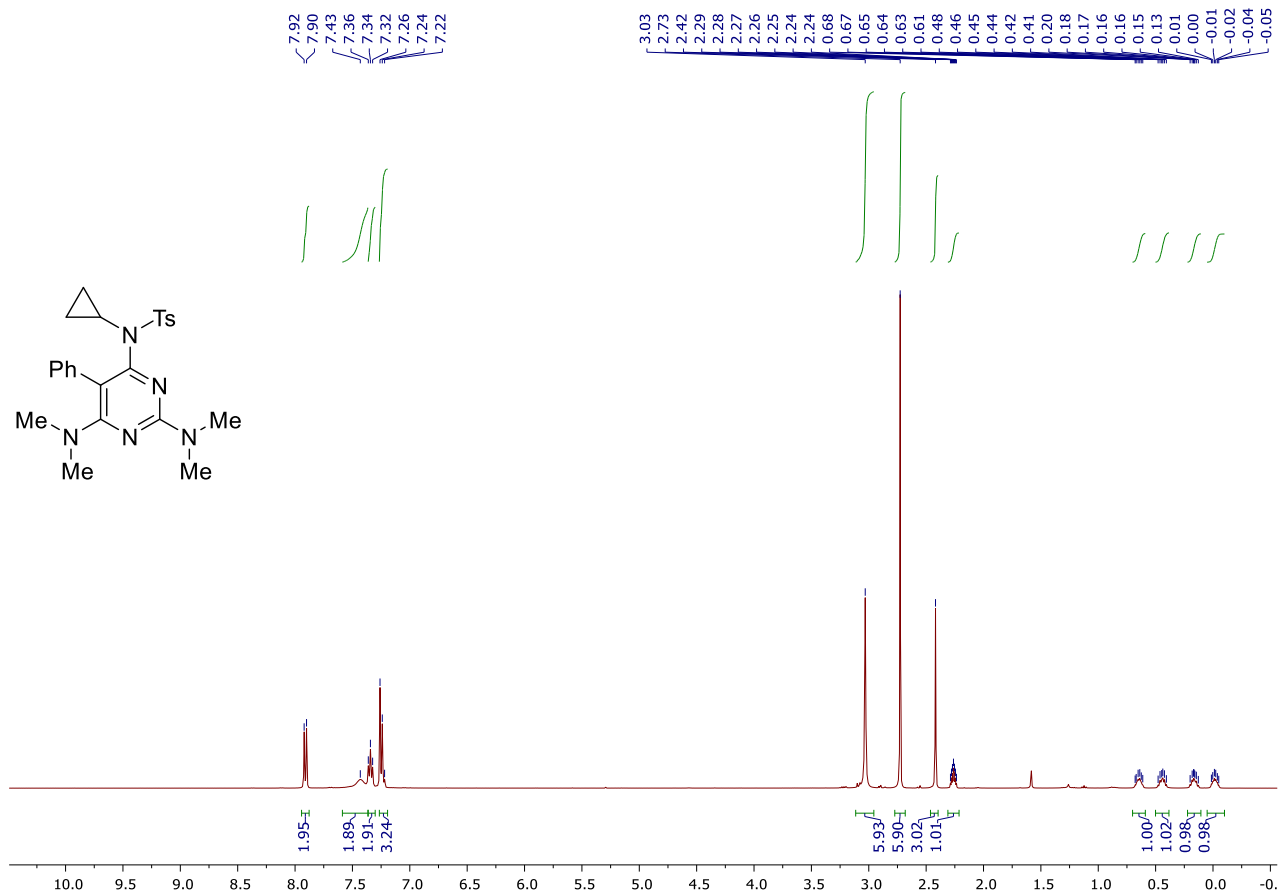

$^{13}\text{C}\{^1\text{H}\}$  NMR (100 MHz,  $\text{CDCl}_3$ ) of **6g**

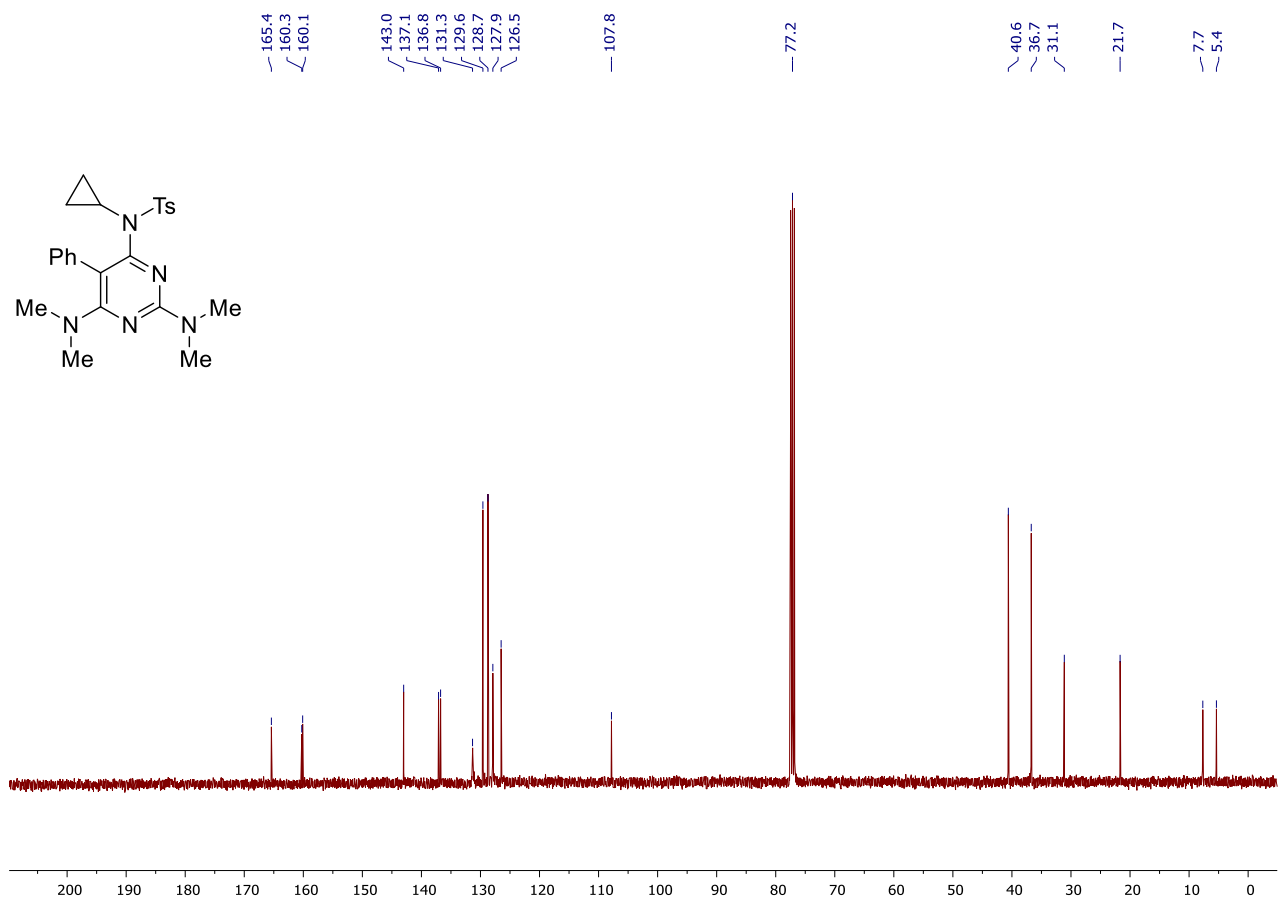

$^1\text{H}$  NMR (400 MHz,  $\text{CDCl}_3$ ) of **6h**

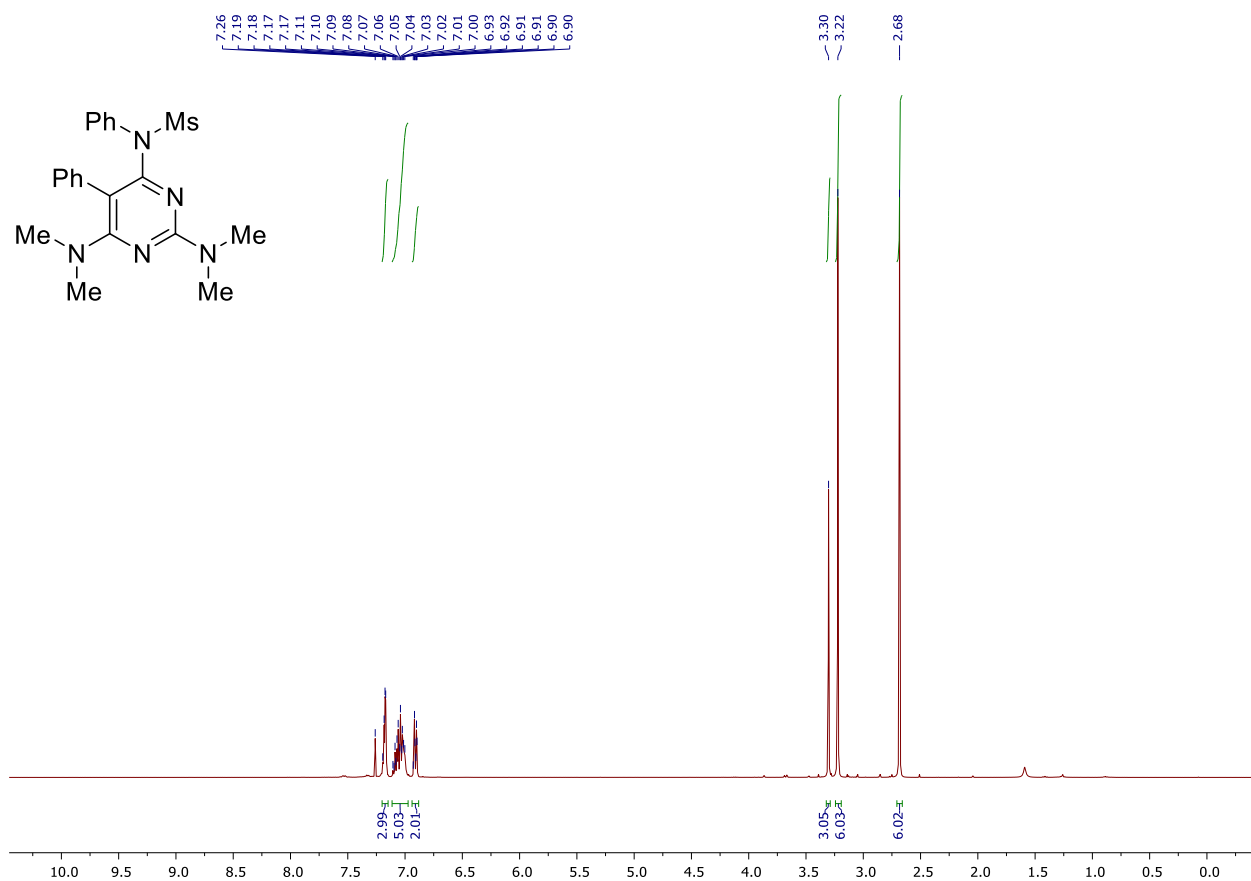

$^{13}\text{C}\{^1\text{H}\}$  NMR (100 MHz,  $\text{CDCl}_3$ ) of **6h**

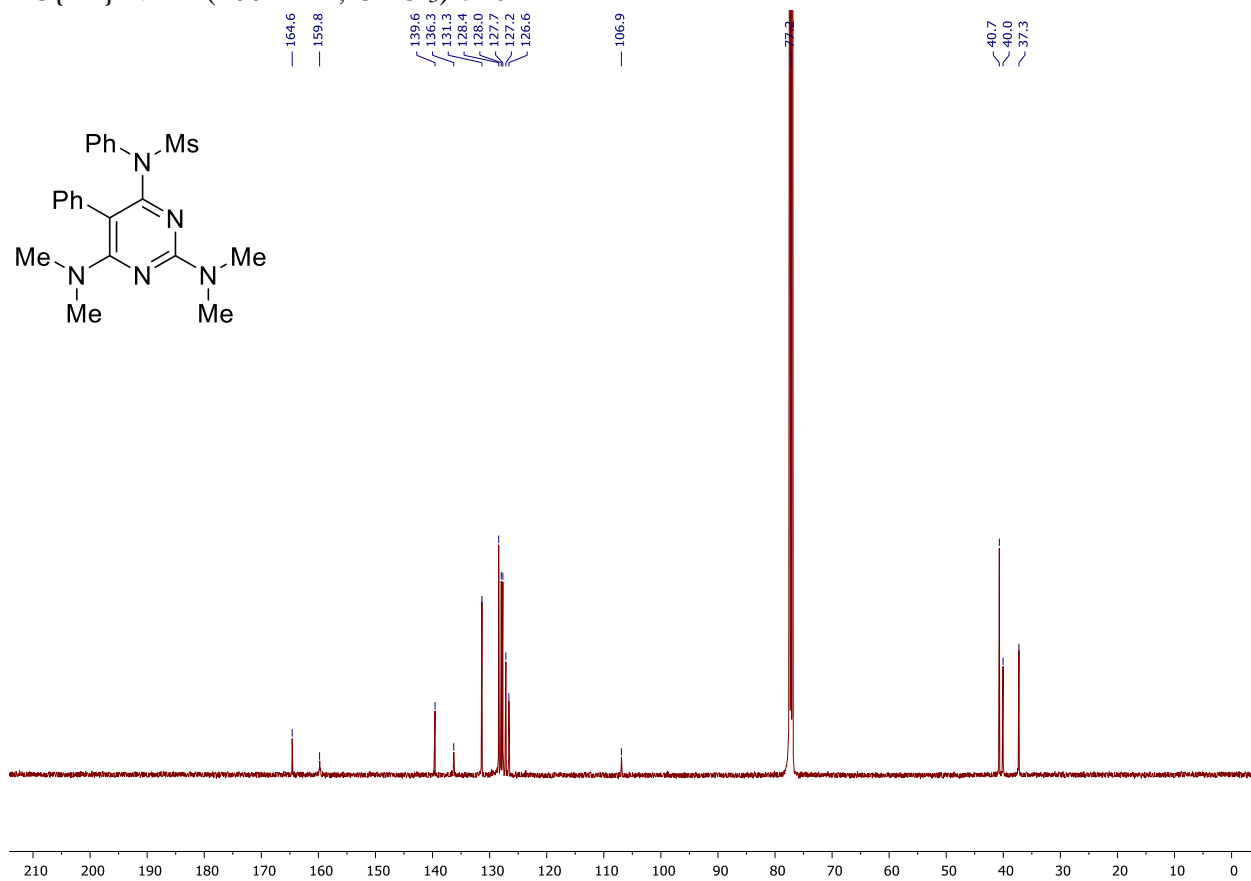

$^1\text{H}$  NMR (400 MHz,  $\text{CDCl}_3$ ) of **6i**

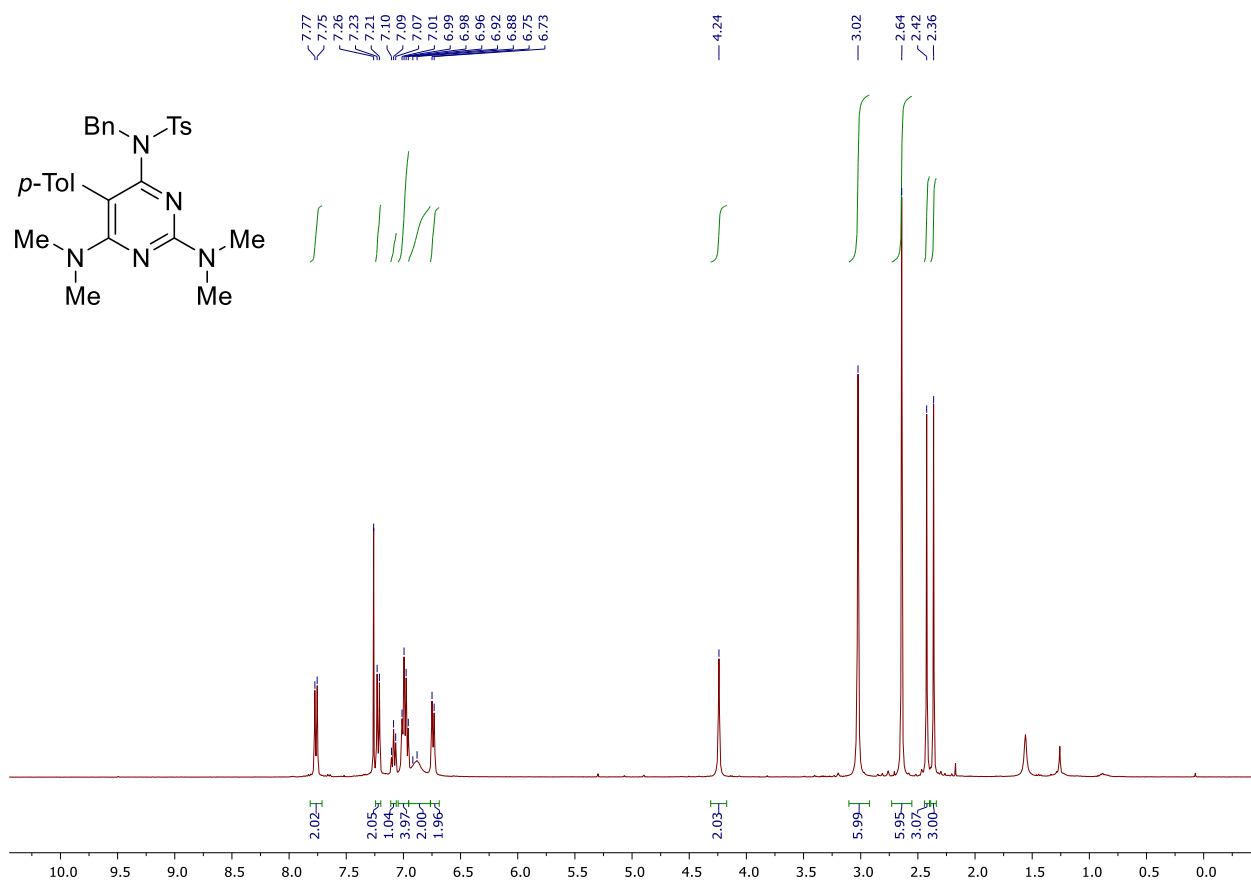

$^{13}\text{C}\{^1\text{H}\}$  NMR (100 MHz,  $\text{CDCl}_3$ ) of **6i**

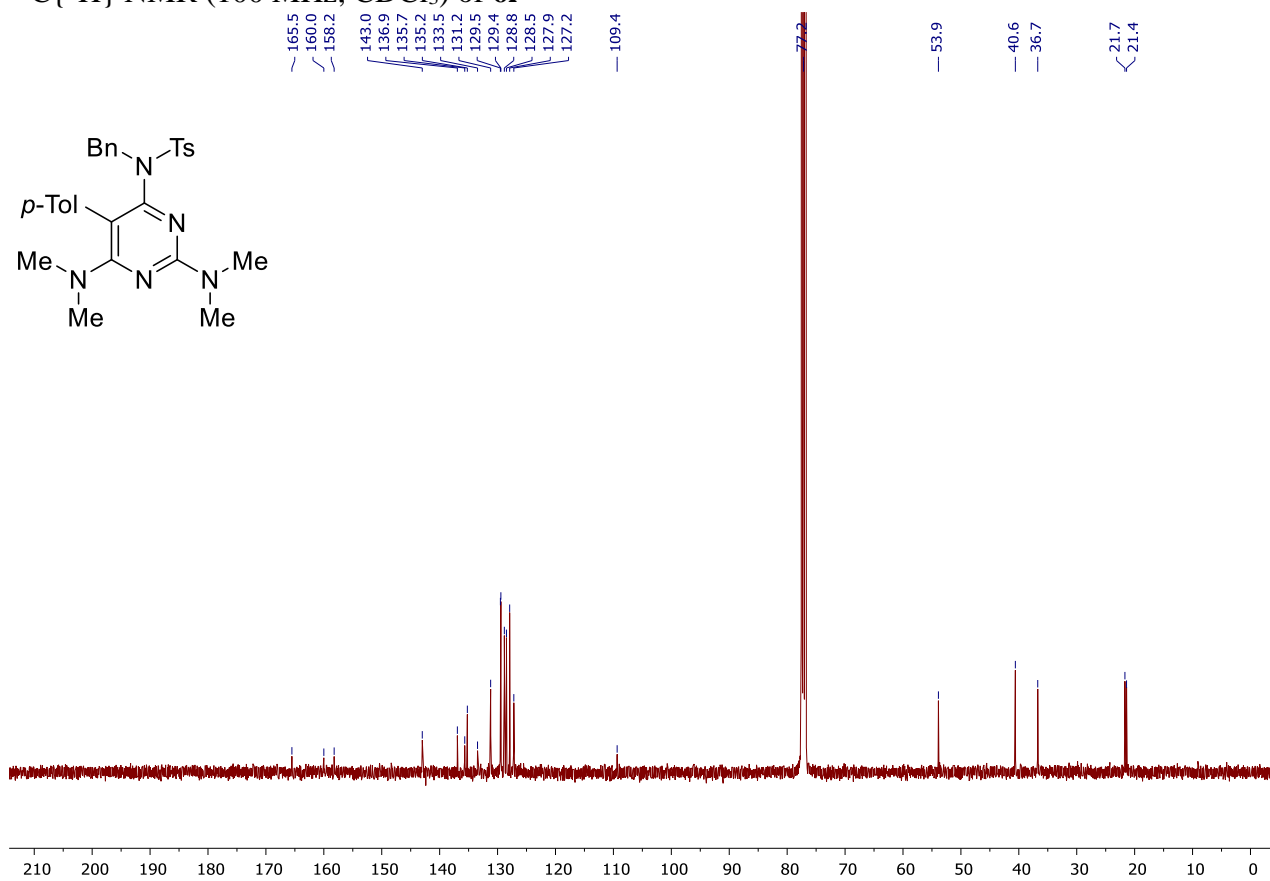

$^1\text{H}$  NMR (400 MHz,  $\text{CDCl}_3$ ) of **6j**

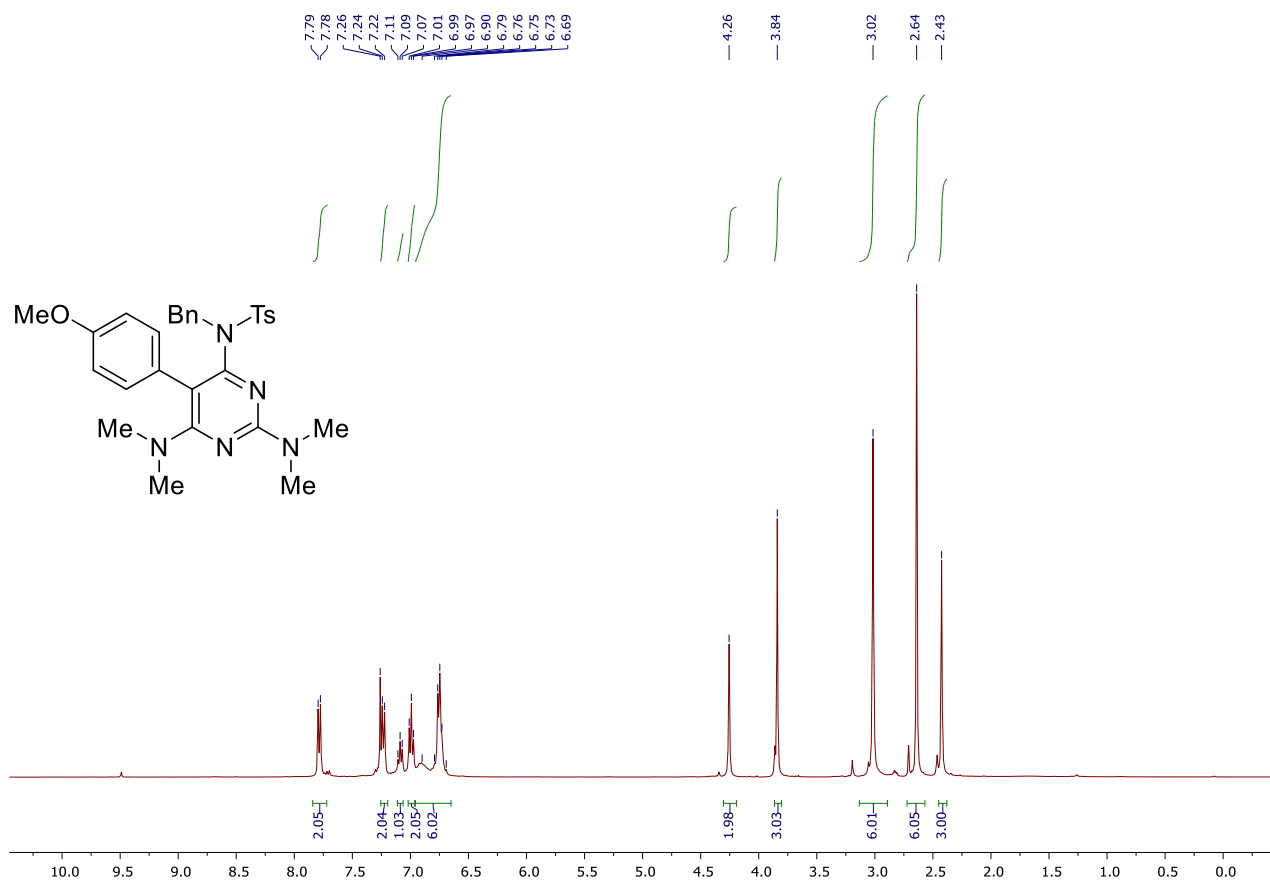

$^{13}\text{C}\{^1\text{H}\}$  NMR (100 MHz,  $\text{CDCl}_3$ ) of **6j**

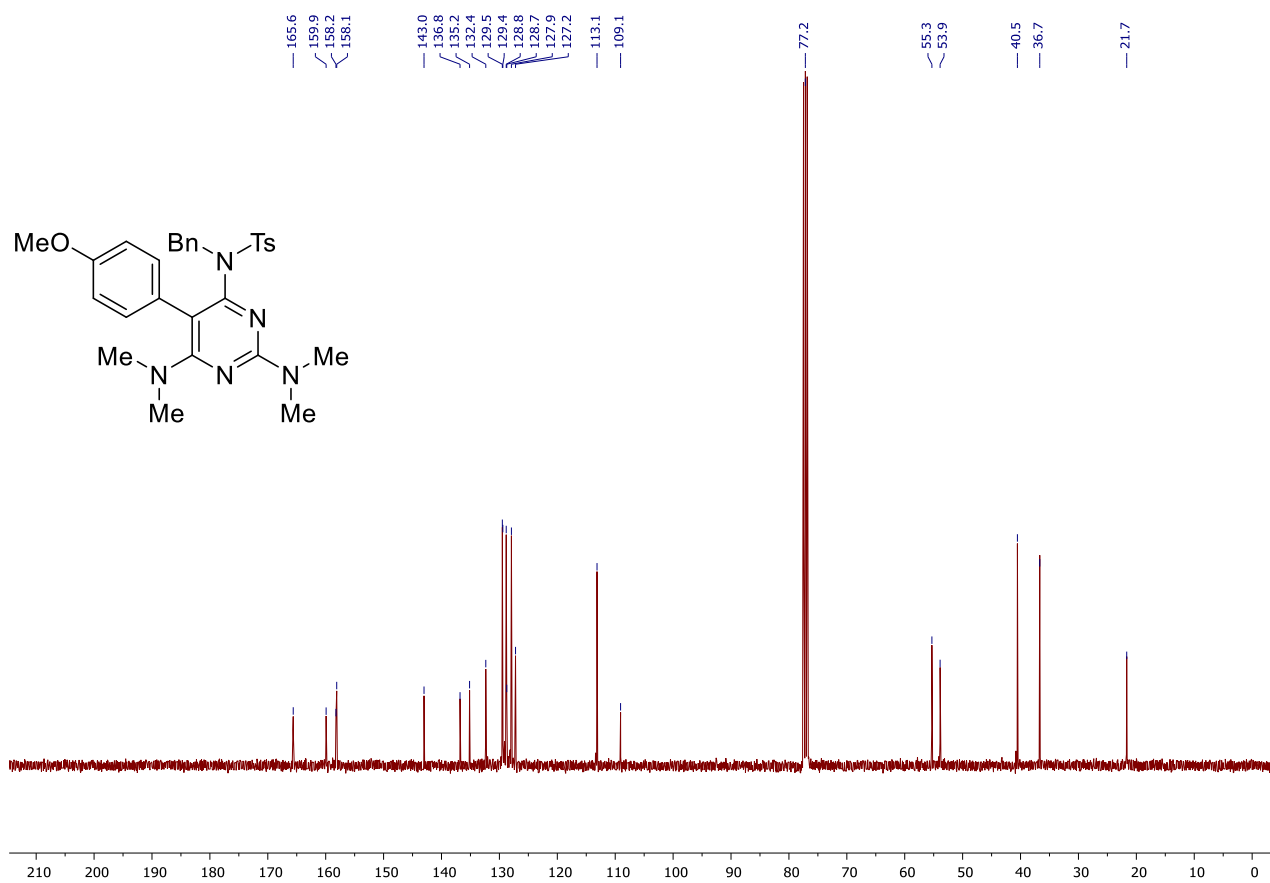

$^1\text{H}$  NMR (400 MHz,  $\text{CDCl}_3$ ) of **6k**

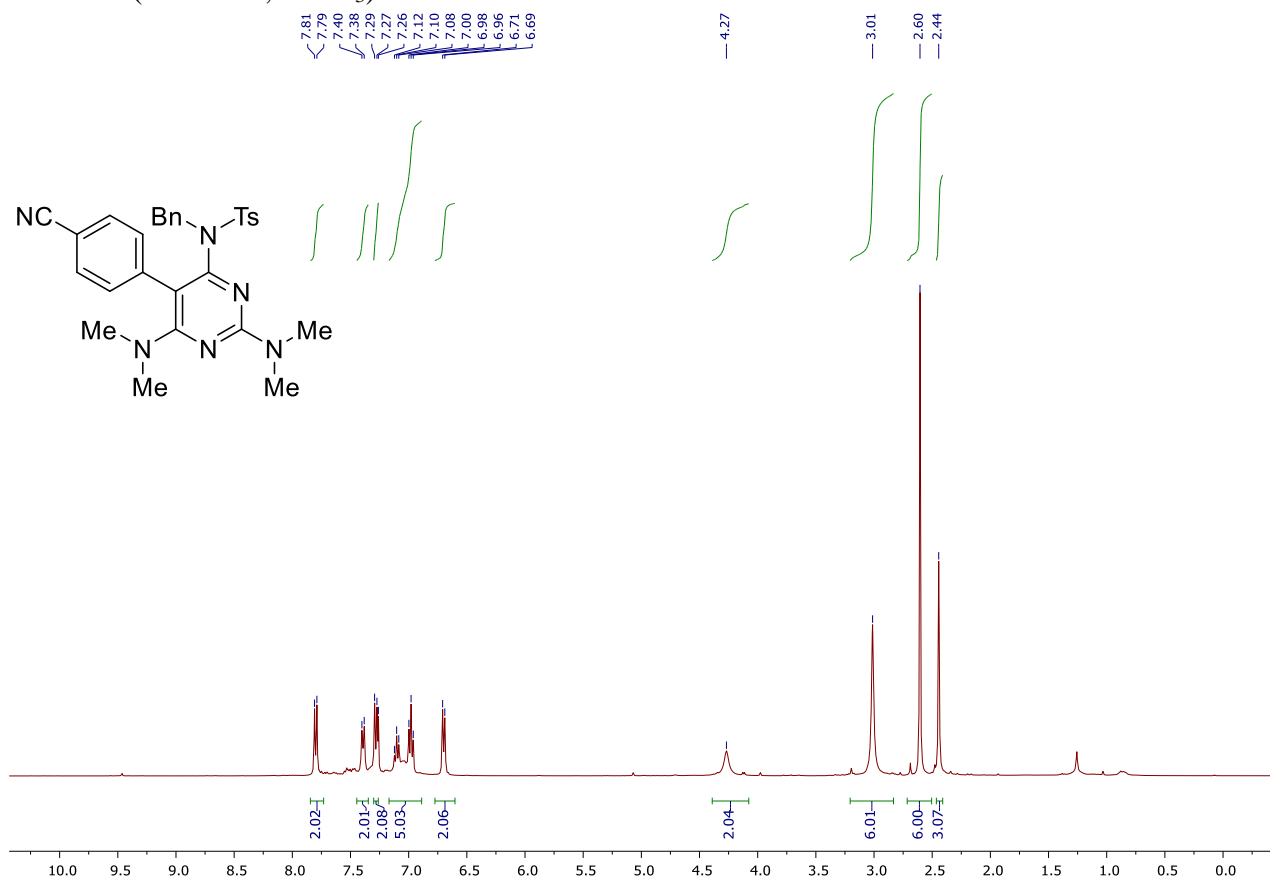

$^{13}\text{C}\{^1\text{H}\}$  NMR (100 MHz,  $\text{CDCl}_3$ ) of **6k**

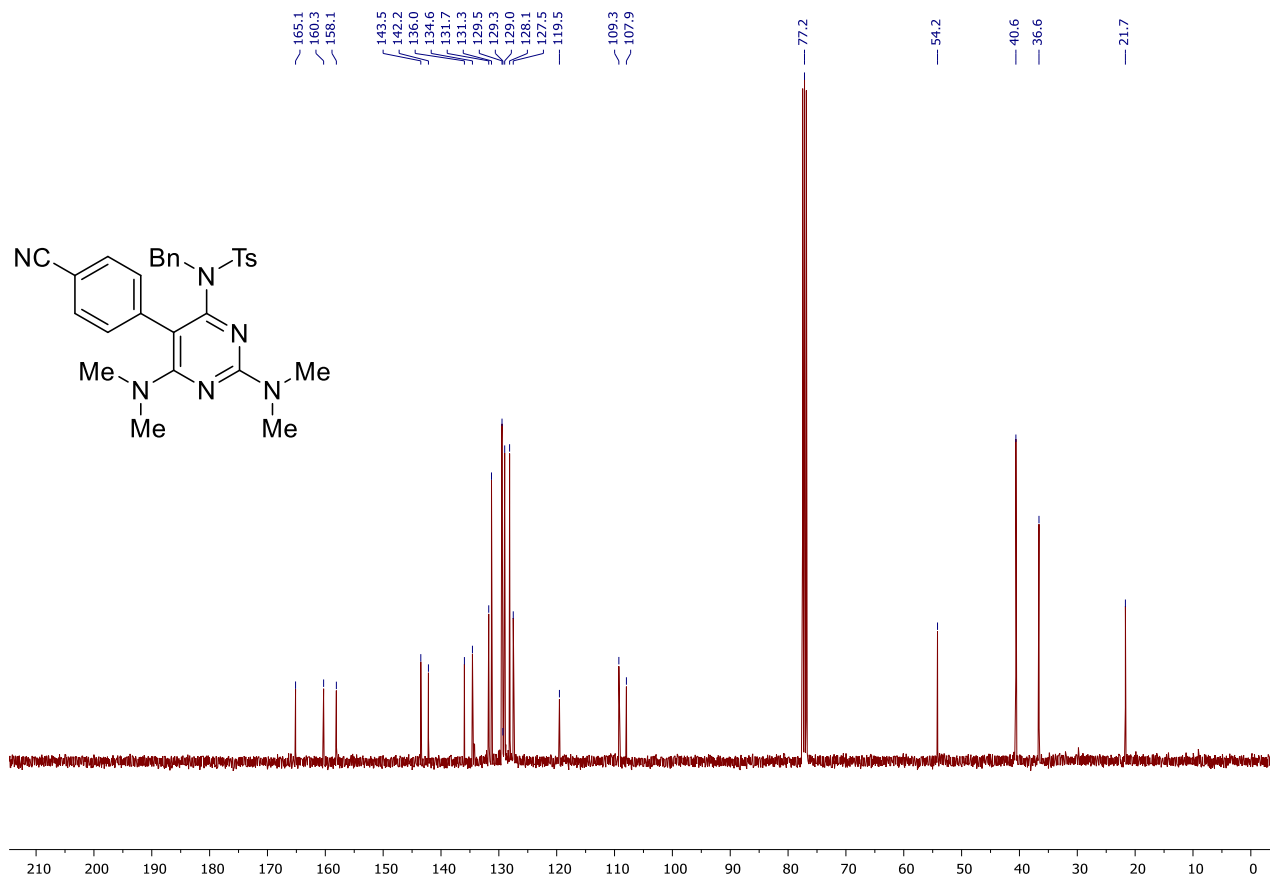

$^1\text{H}$  NMR (400 MHz,  $\text{CDCl}_3$ ) of **6l**

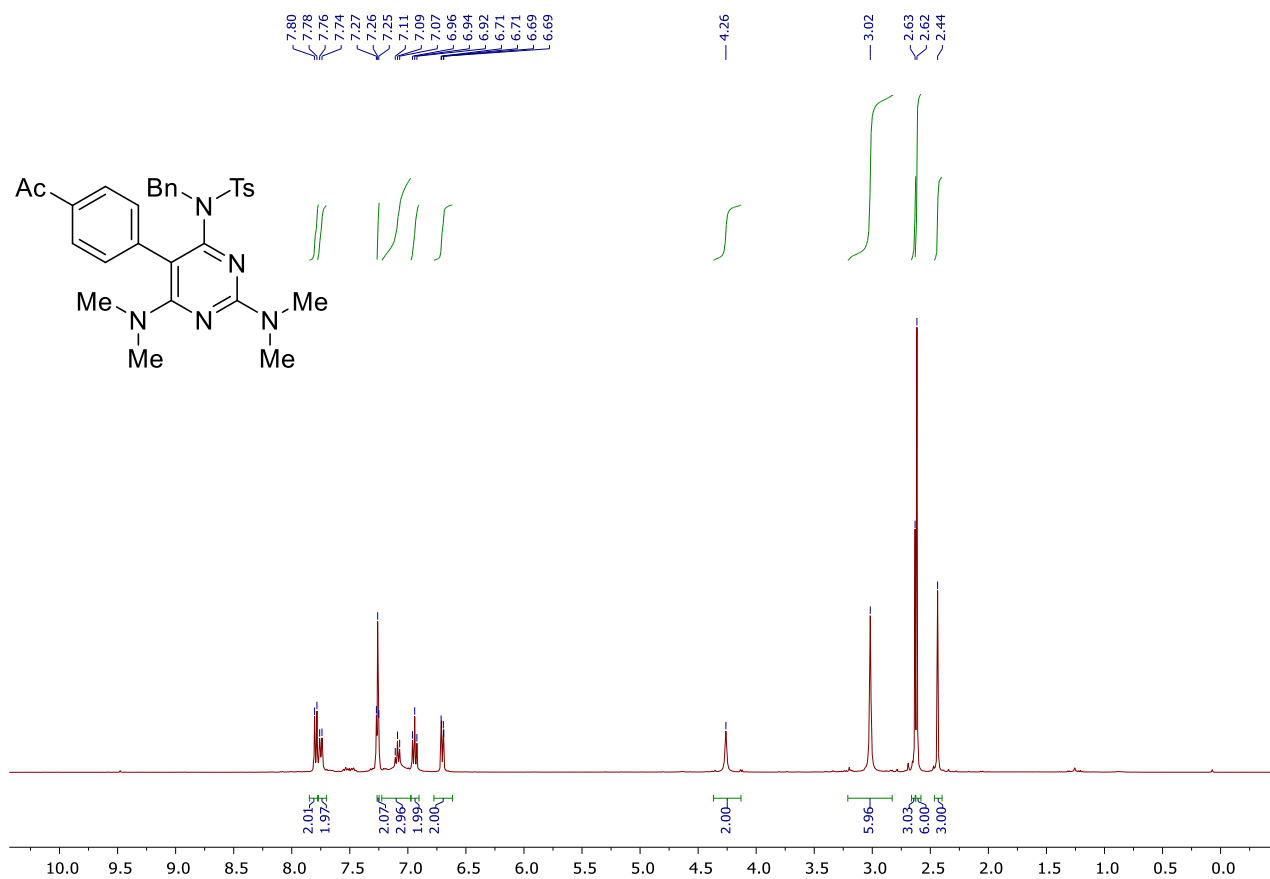

$^{13}\text{C}\{^1\text{H}\}$  NMR (100 MHz,  $\text{CDCl}_3$ ) of **6l**

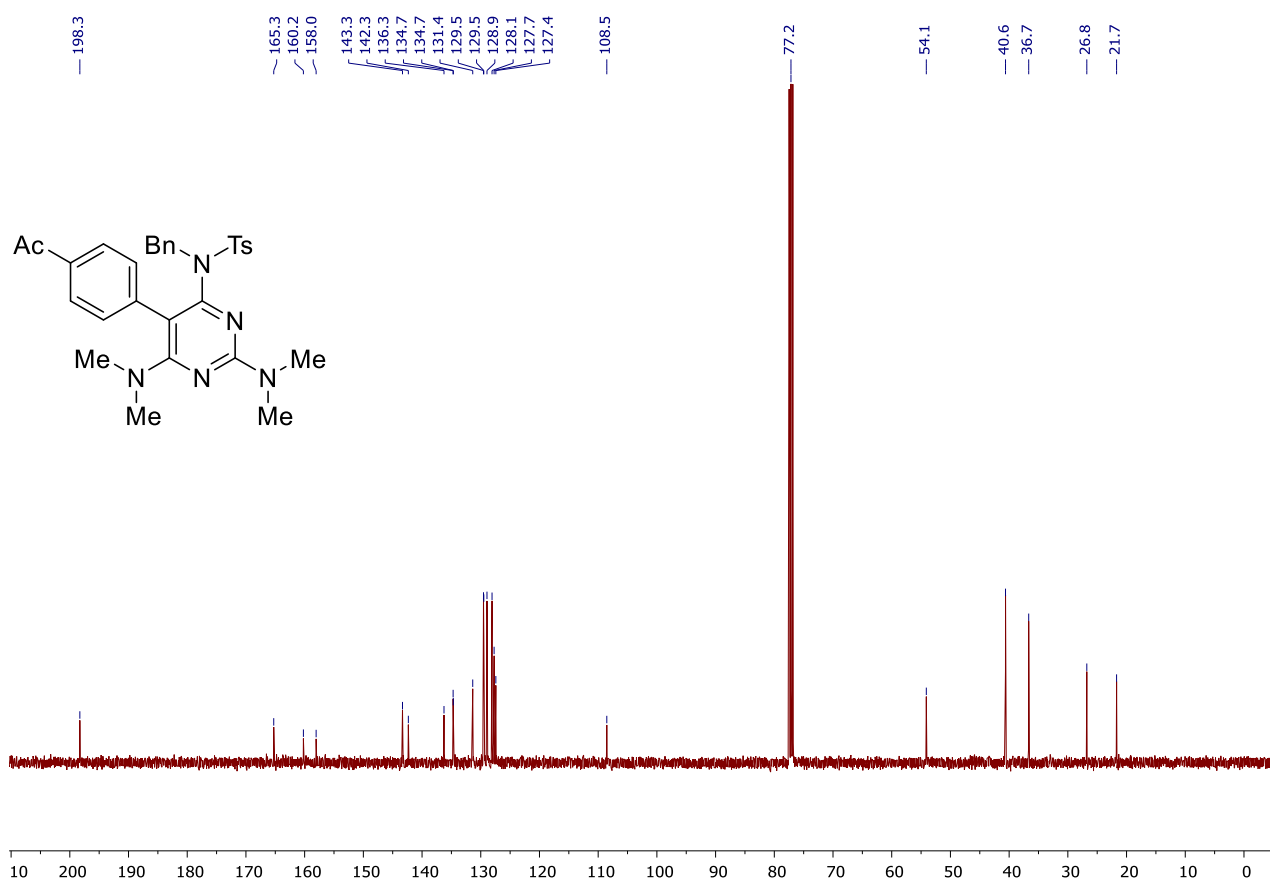

$^1\text{H}$  NMR (400 MHz,  $\text{CDCl}_3$ ) of **6m**

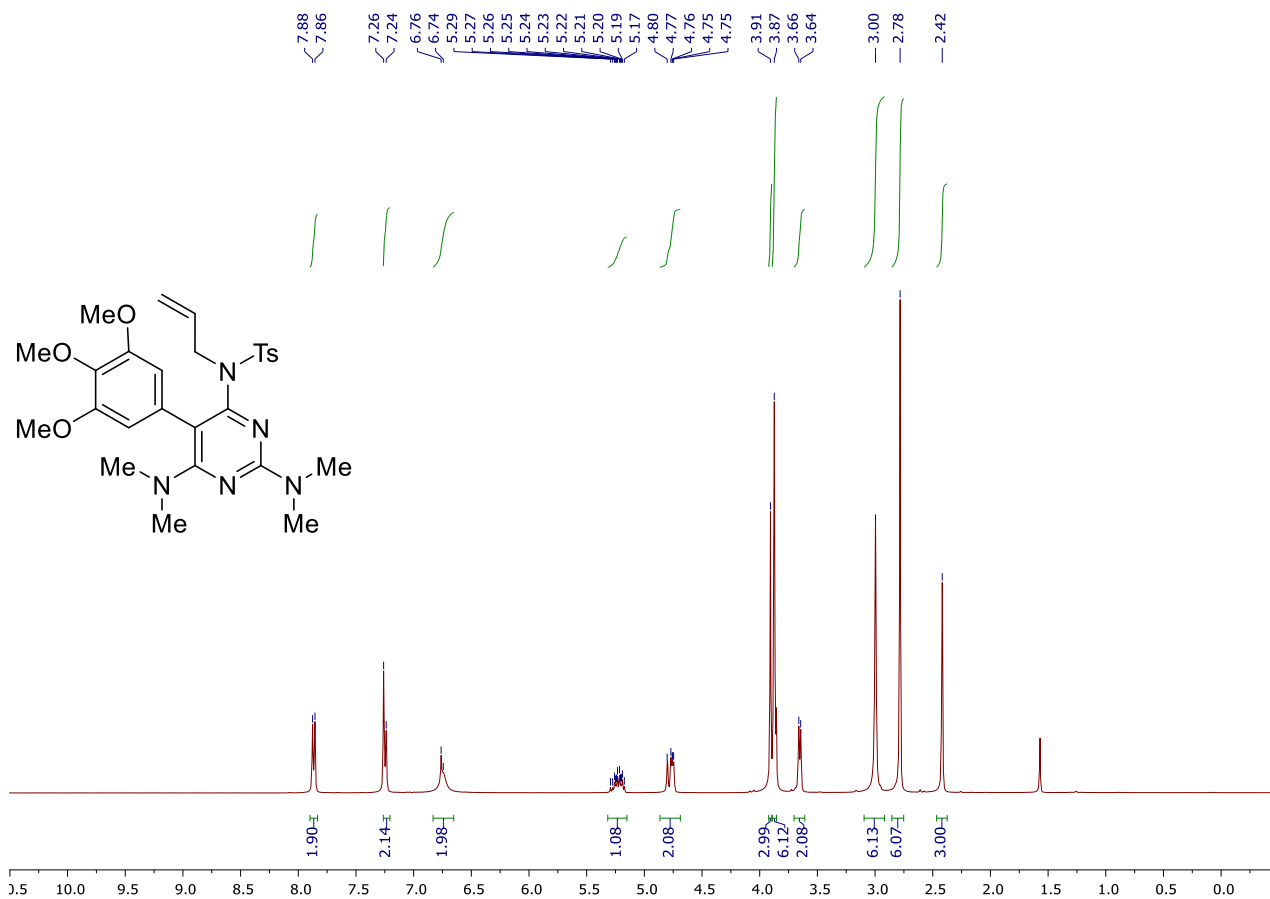

$^{13}\text{C}\{^1\text{H}\}$  NMR (100 MHz,  $\text{CDCl}_3$ ) of **6m**

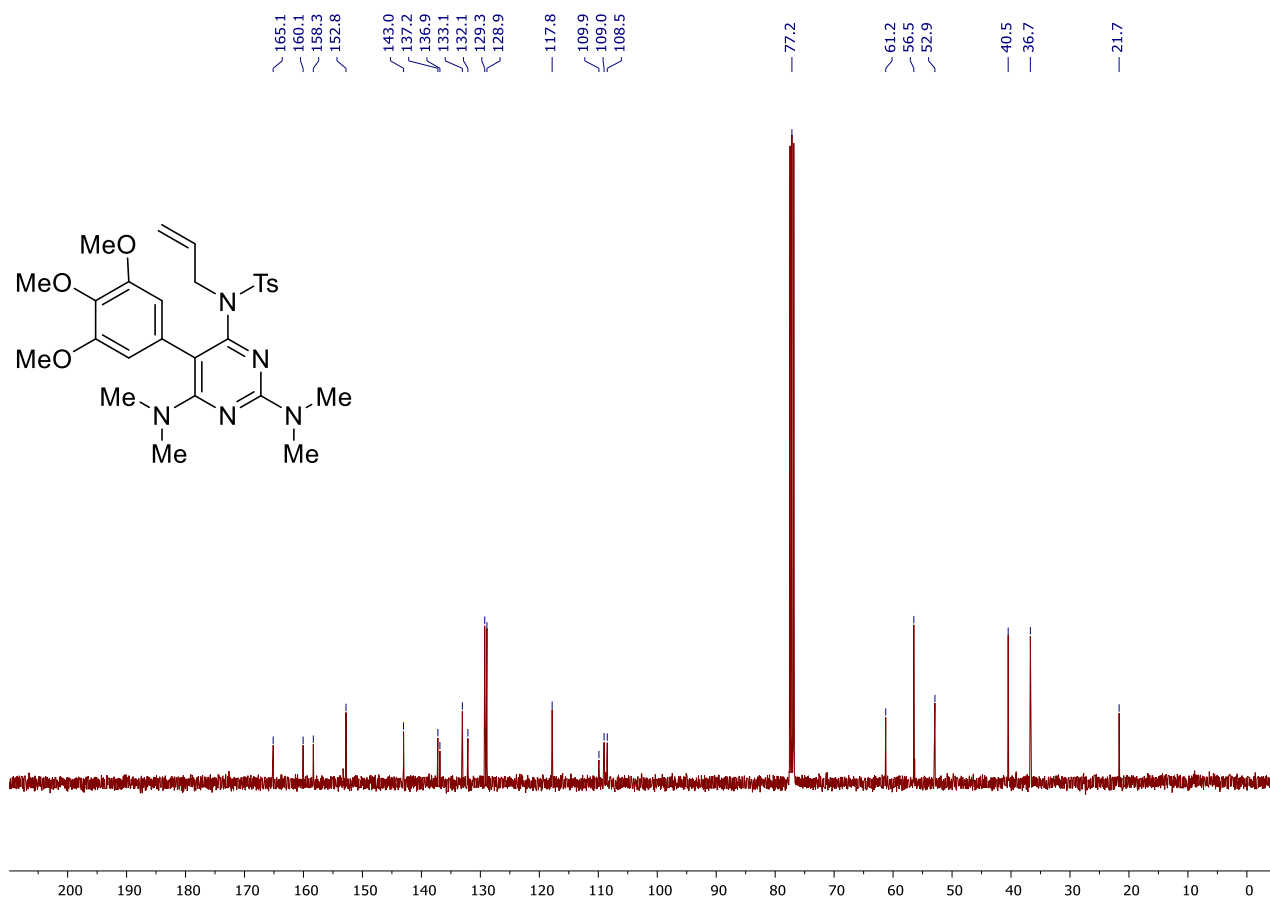

$^1\text{H}$  NMR (400 MHz,  $\text{CDCl}_3$ ) of **6n**

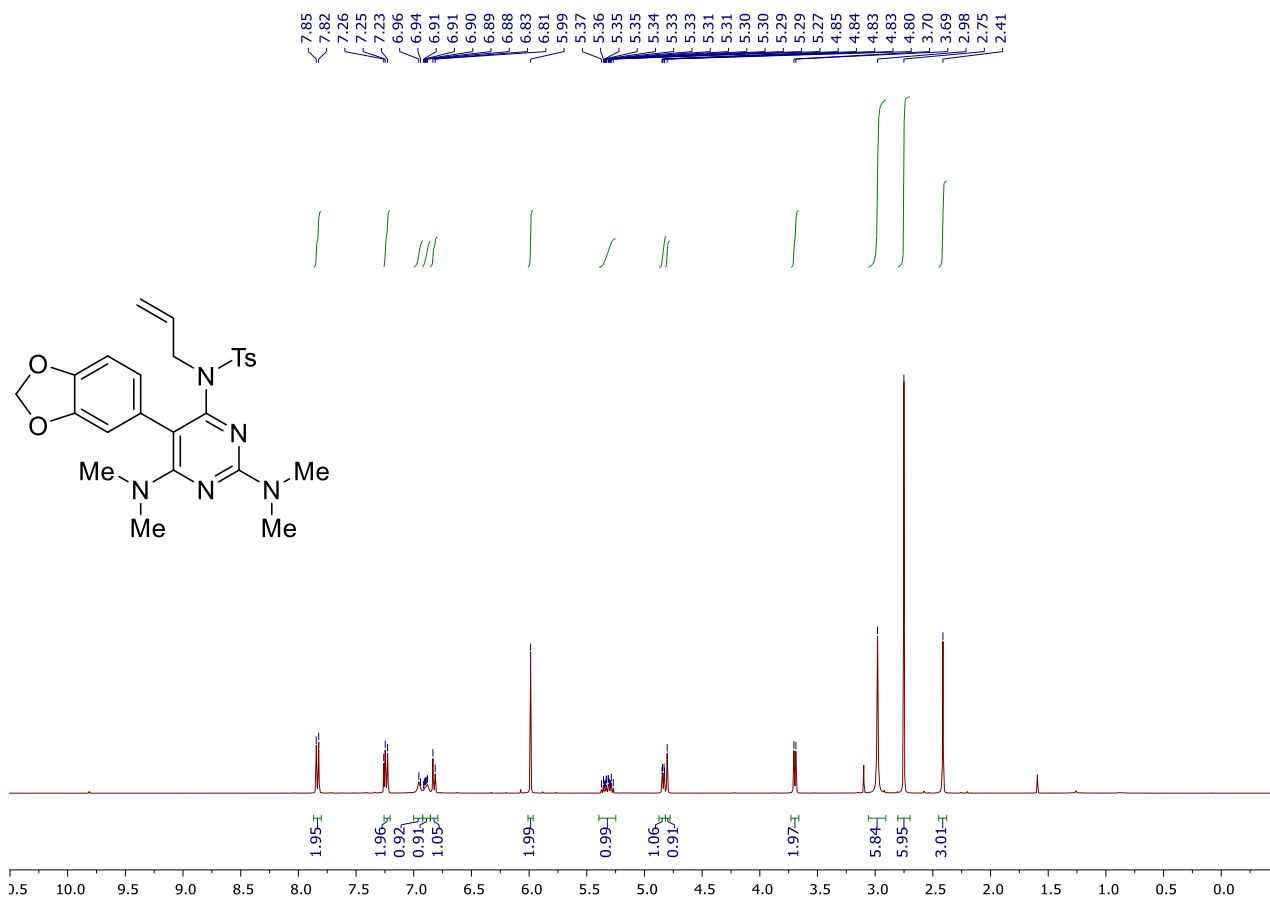

$^{13}\text{C}\{^1\text{H}\}$  NMR (100 MHz,  $\text{CDCl}_3$ ) of **6n**

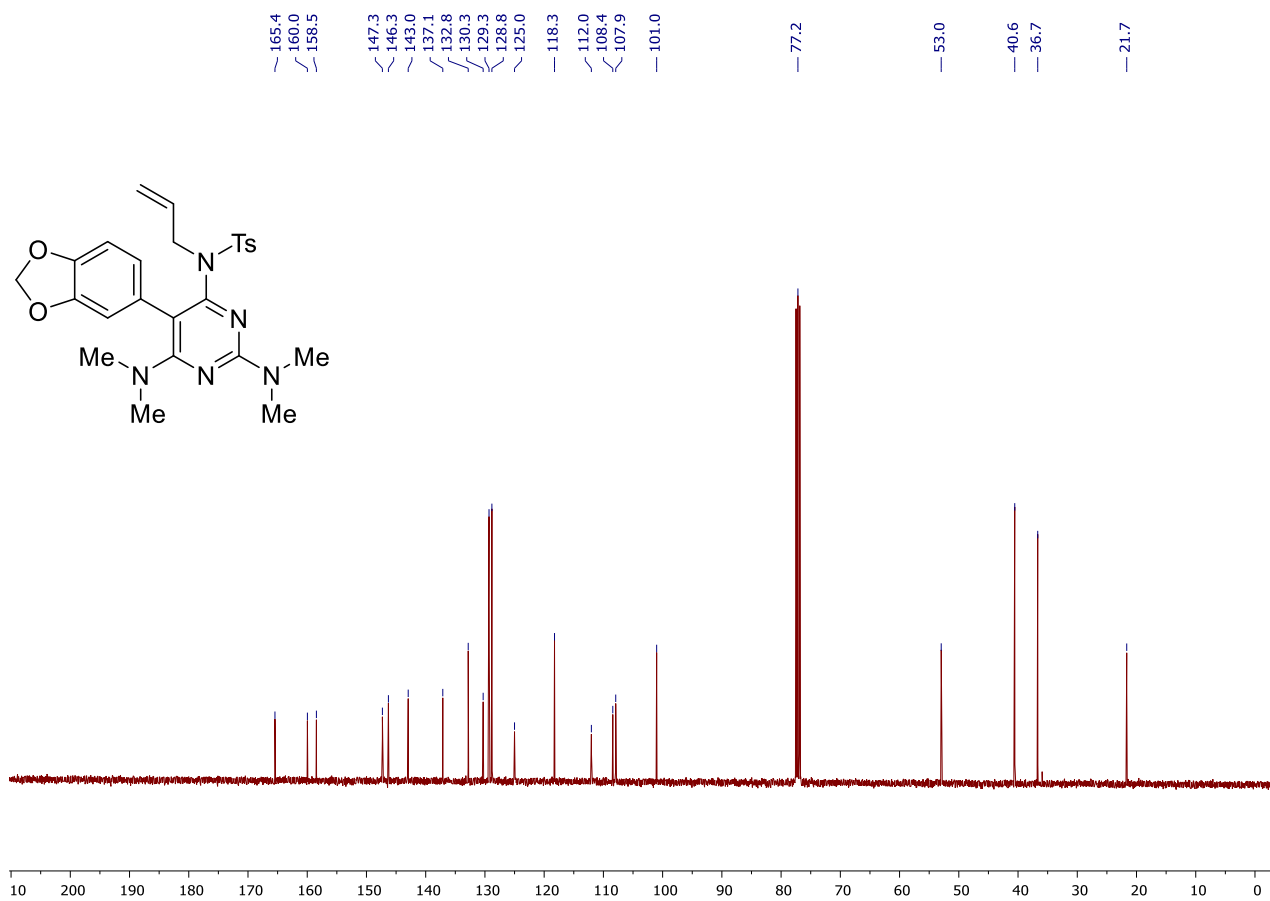



$^1\text{H}$  NMR (400 MHz,  $\text{CDCl}_3$ ) of **60**

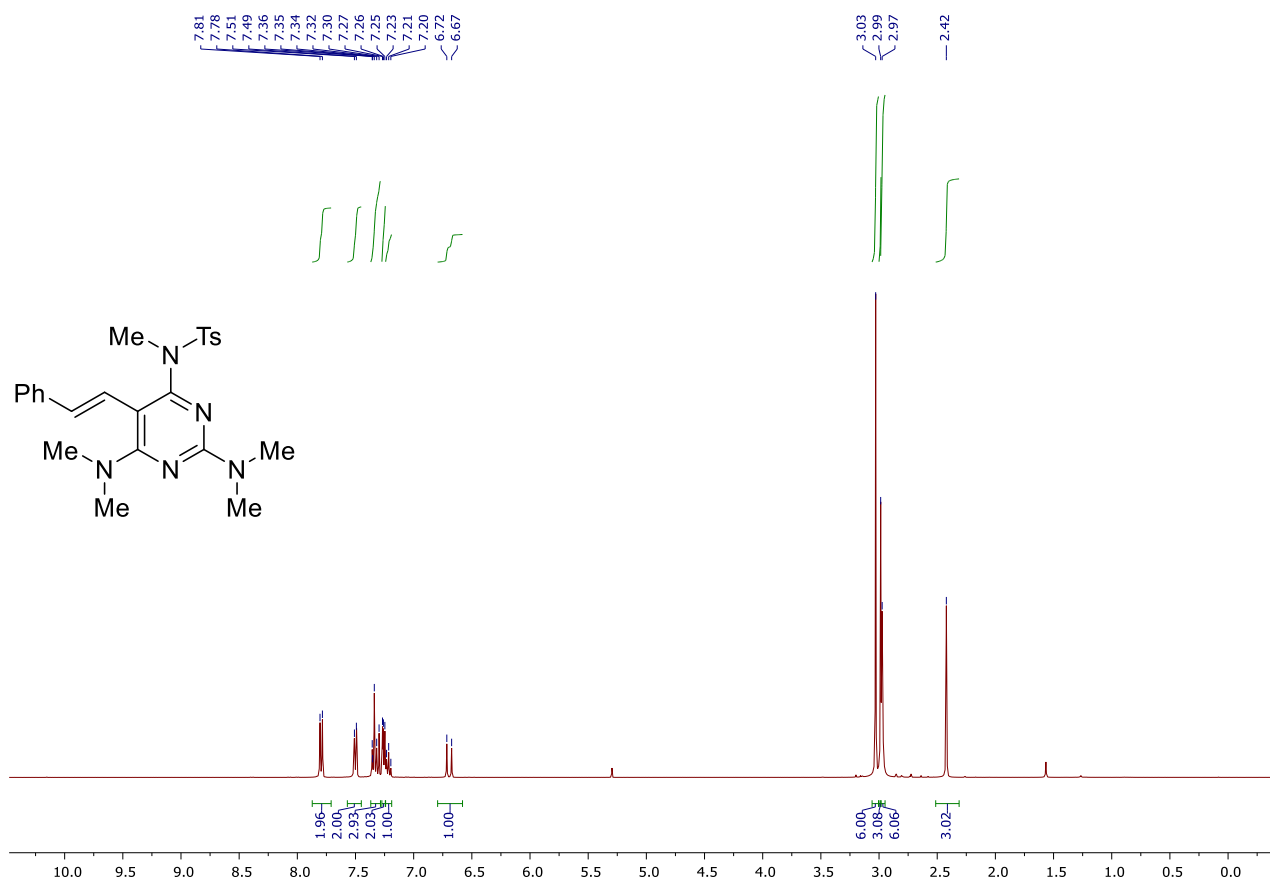

$^{13}\text{C}\{^1\text{H}\}$  NMR (100 MHz,  $\text{CDCl}_3$ ) of **60**

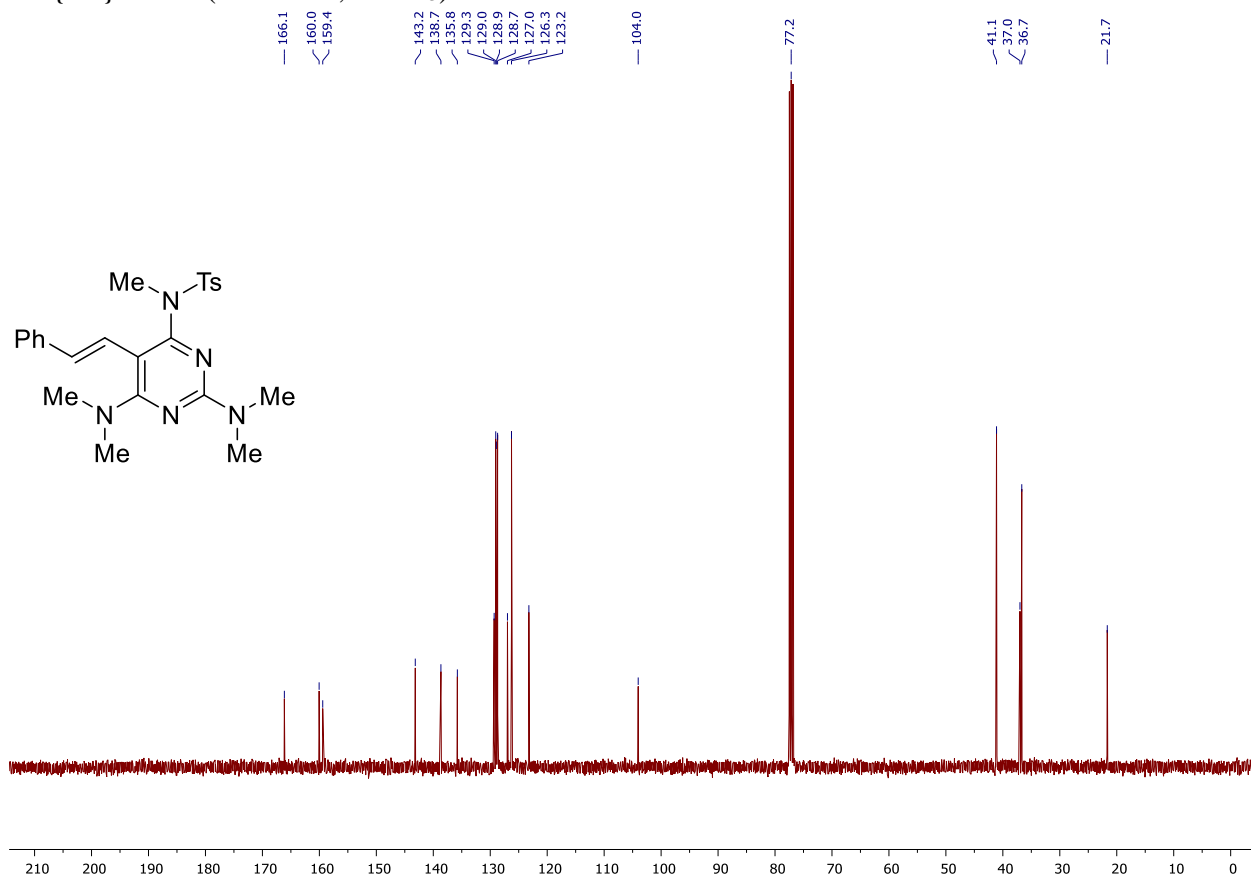

$^1\text{H}$  NMR (400 MHz,  $\text{CDCl}_3$ ) of **6p**

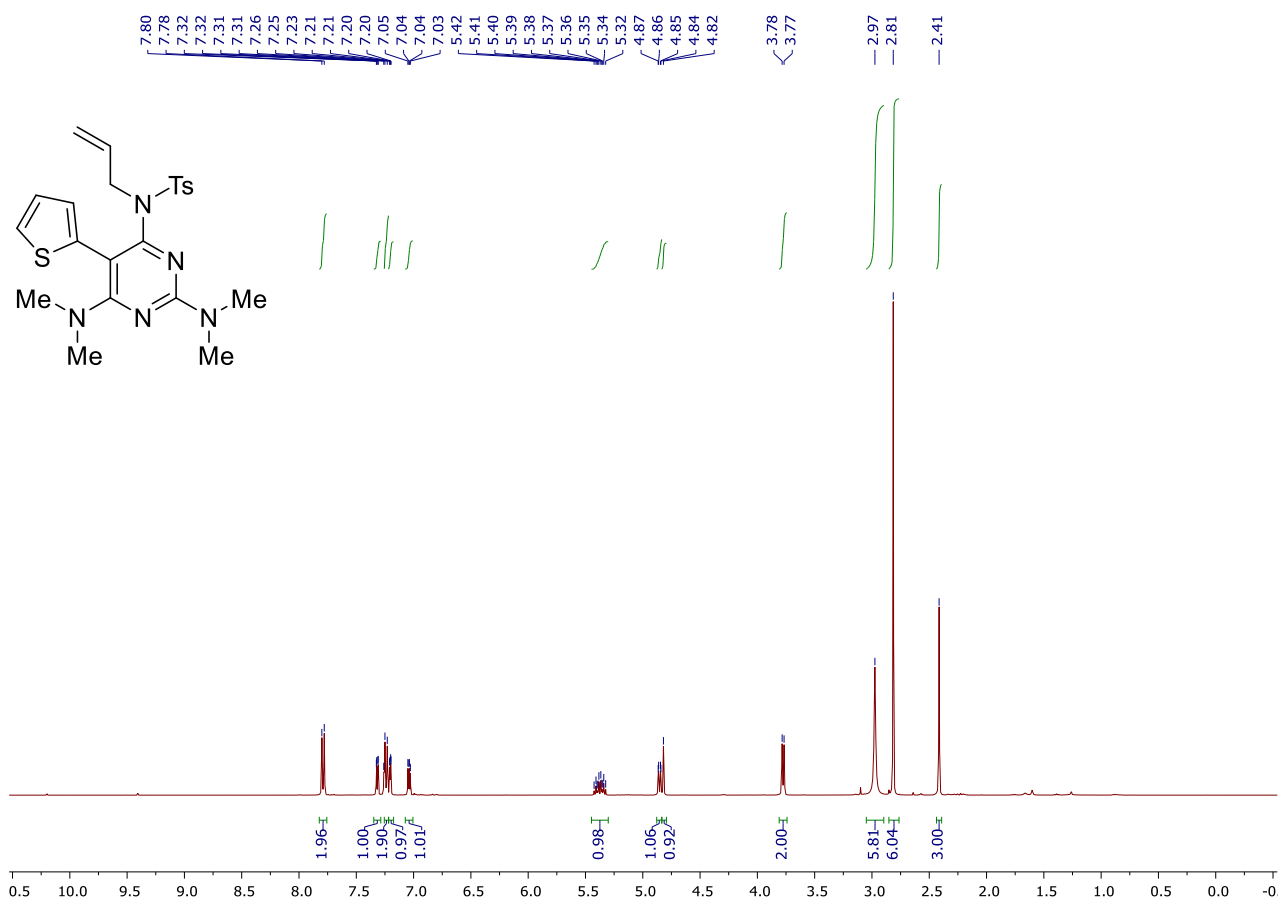

$^{13}\text{C}\{^1\text{H}\}$  NMR (100 MHz,  $\text{CDCl}_3$ ) of **6p**

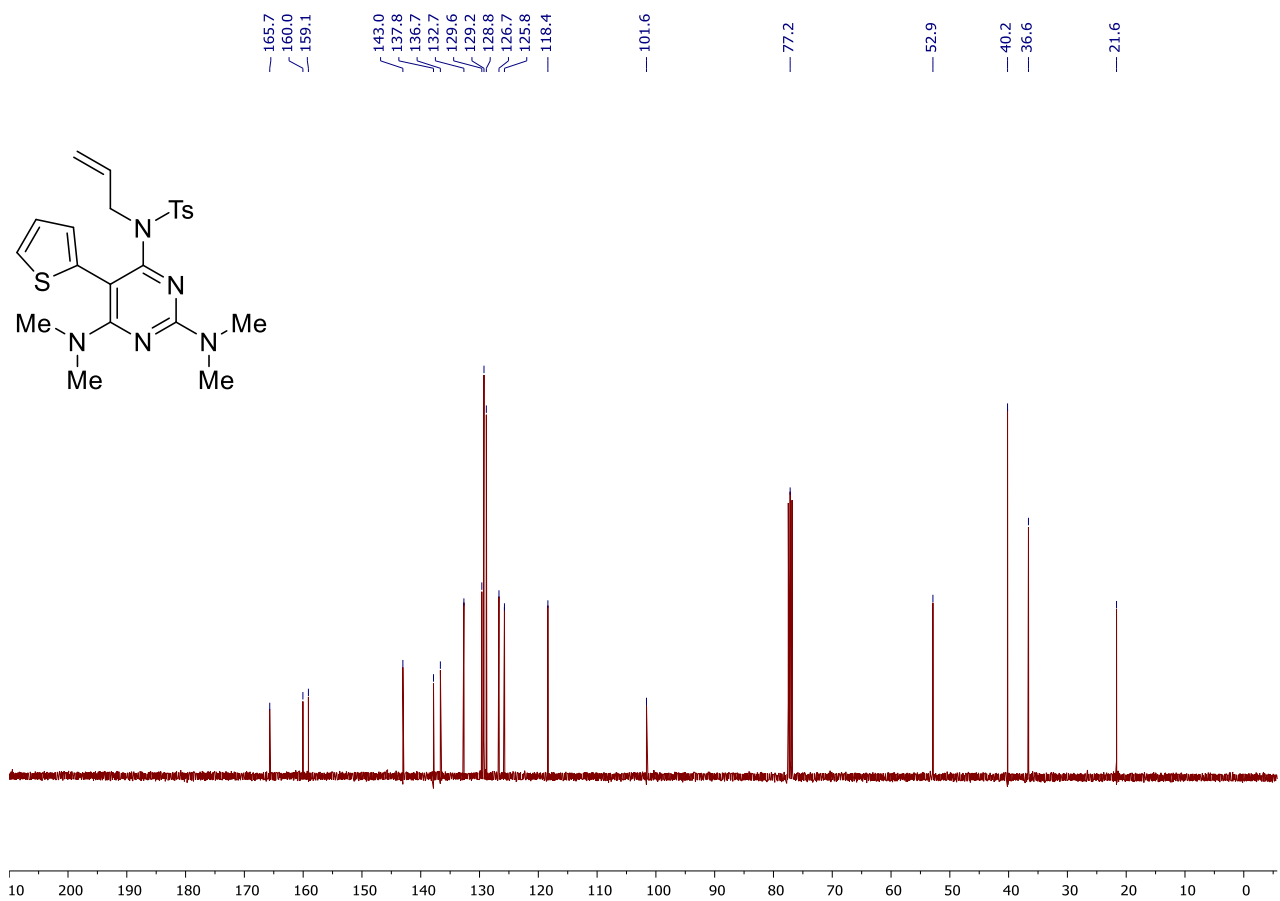

$^1\text{H}$  NMR (400 MHz,  $\text{CDCl}_3$ ) of **6q**

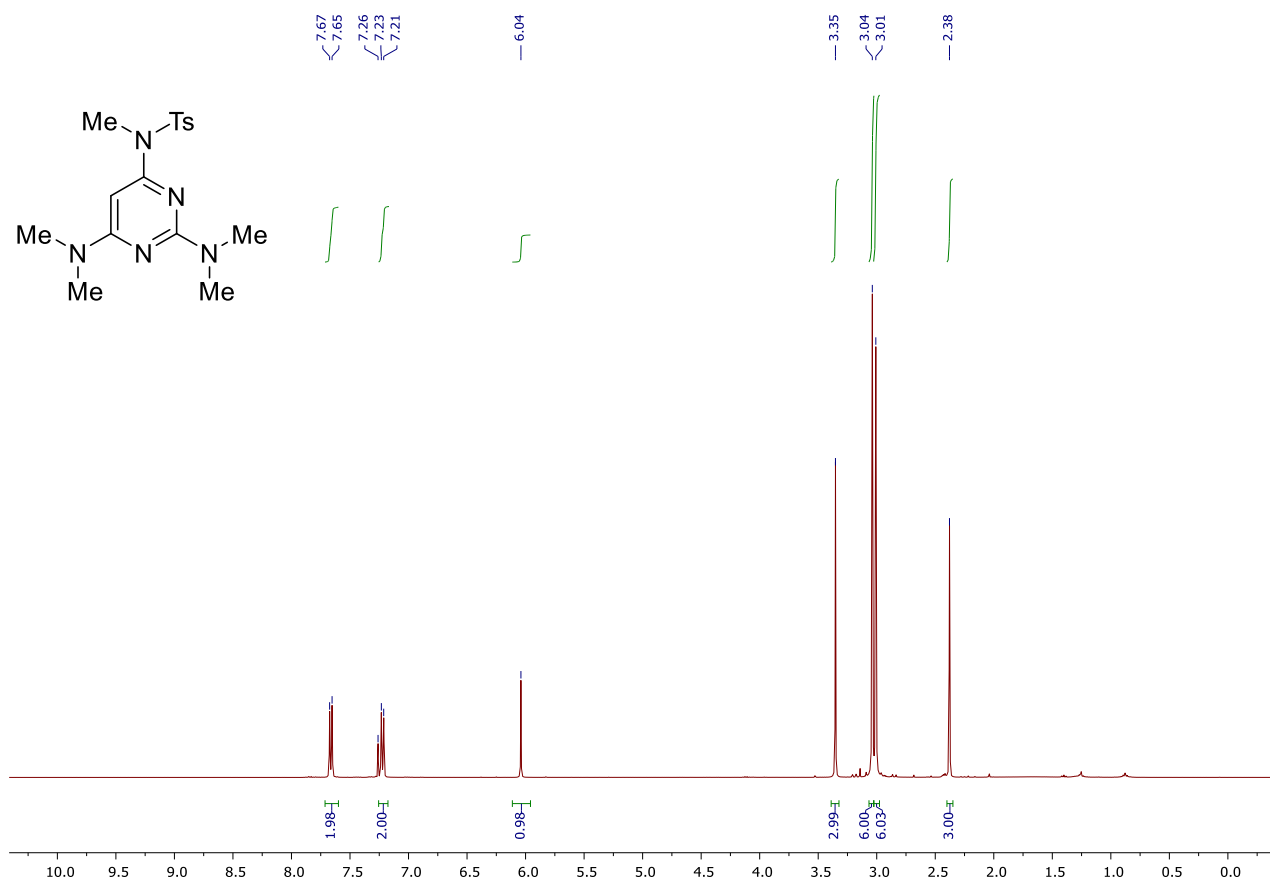

$^{13}\text{C}\{^1\text{H}\}$  NMR (100 MHz,  $\text{CDCl}_3$ ) of **6q**

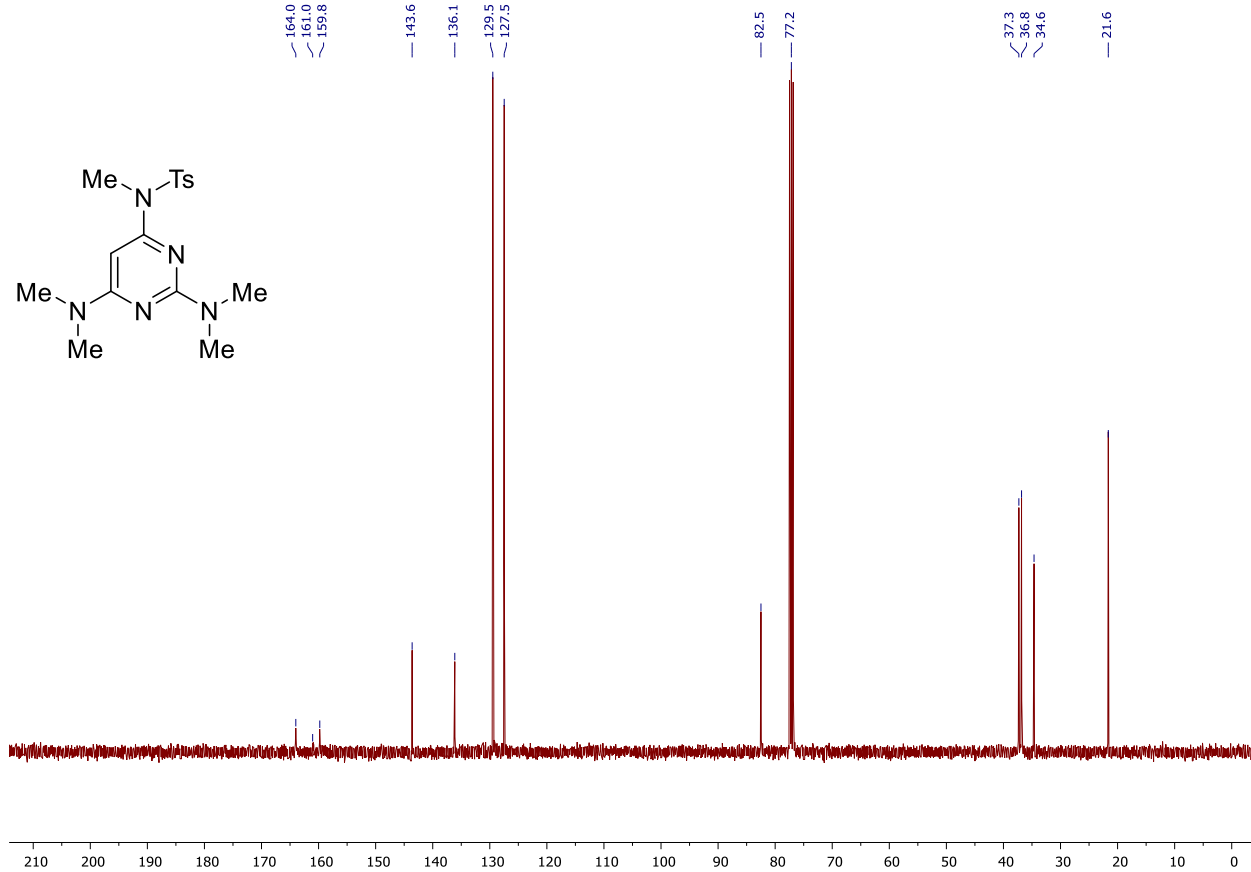

$^1\text{H}$  NMR (400 MHz,  $\text{CDCl}_3$ ) of **6r**

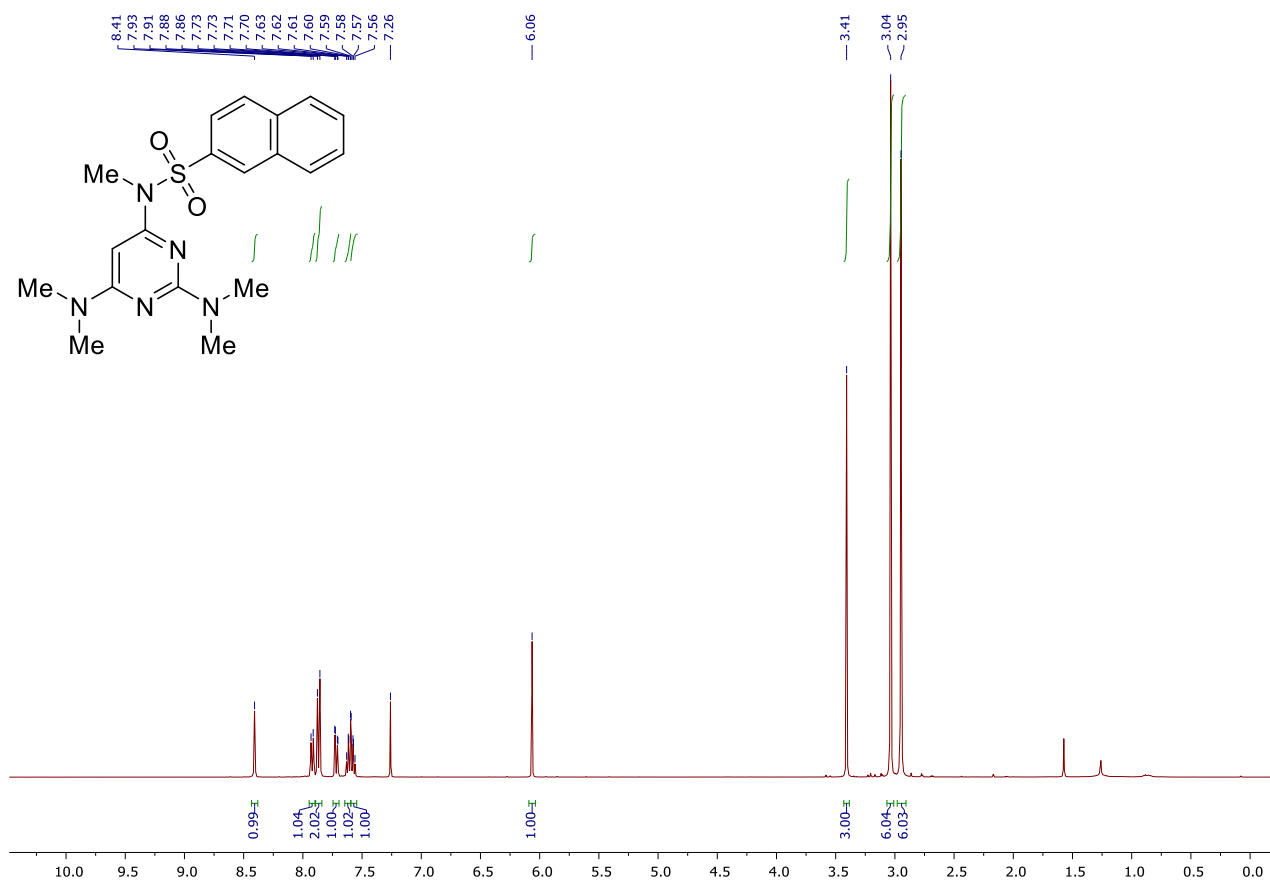

$^{13}\text{C}\{^1\text{H}\}$  NMR (100 MHz,  $\text{CDCl}_3$ ) of **6r**

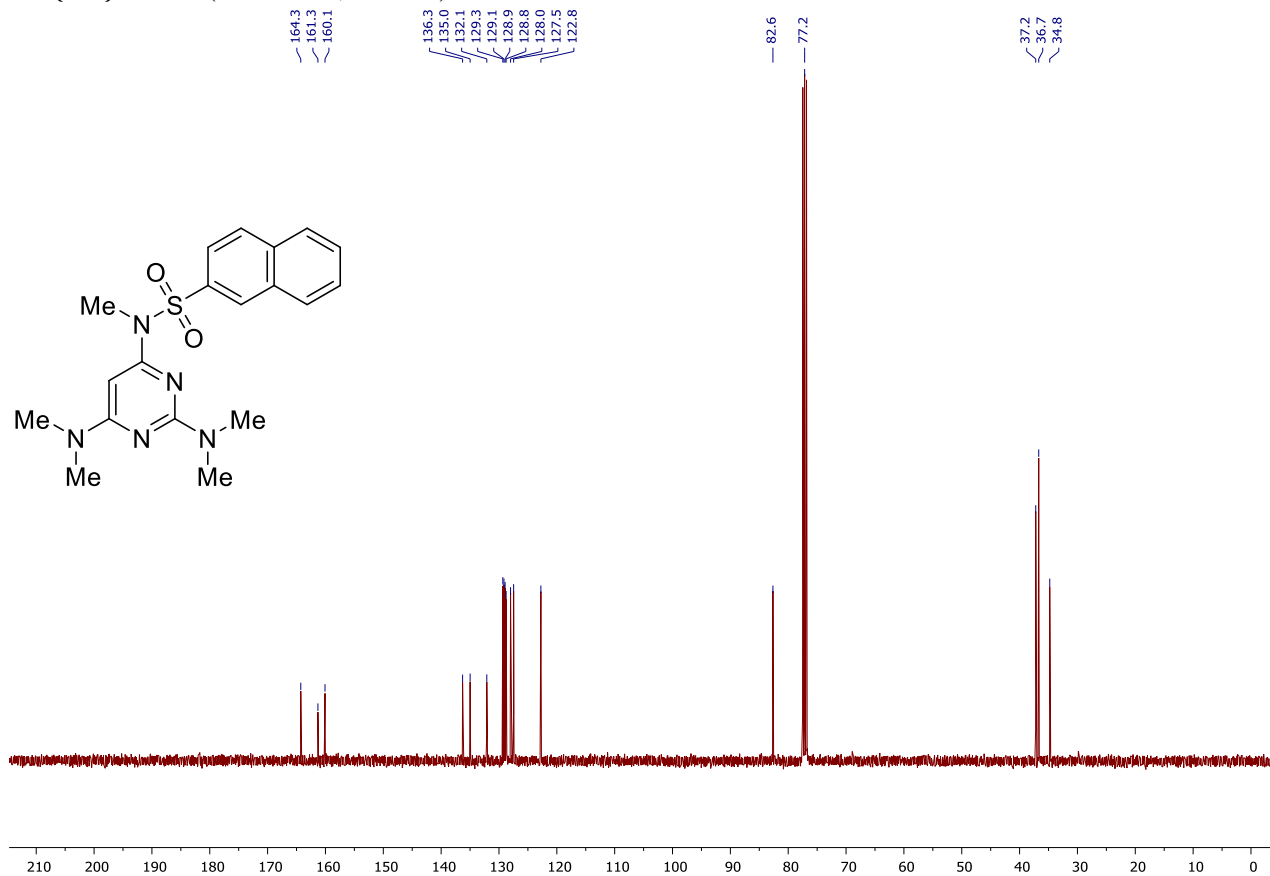

$^1\text{H}$  NMR (400 MHz,  $\text{CDCl}_3$ ) of **6s**

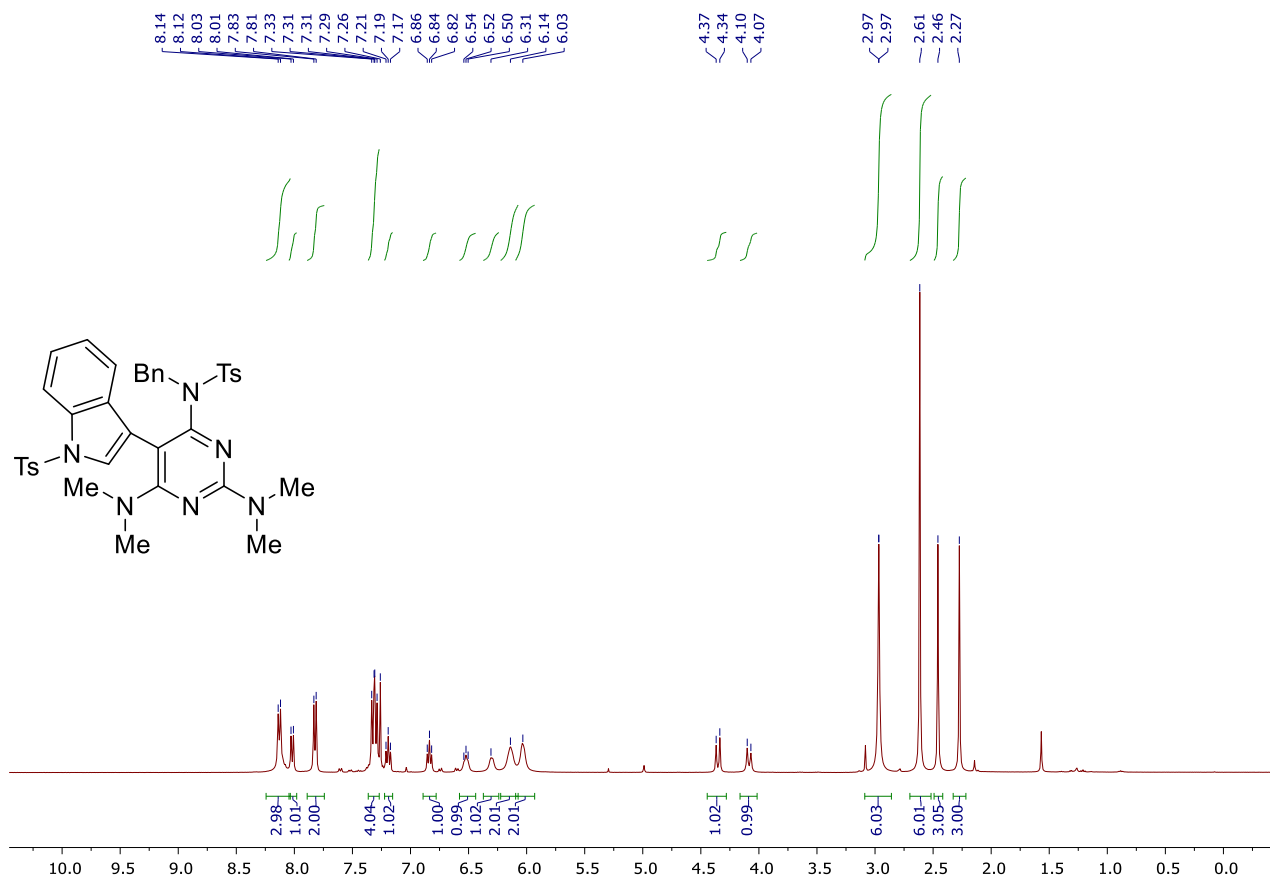

$^{13}\text{C}\{^1\text{H}\}$  NMR (100 MHz,  $\text{CDCl}_3$ ) of **6s**

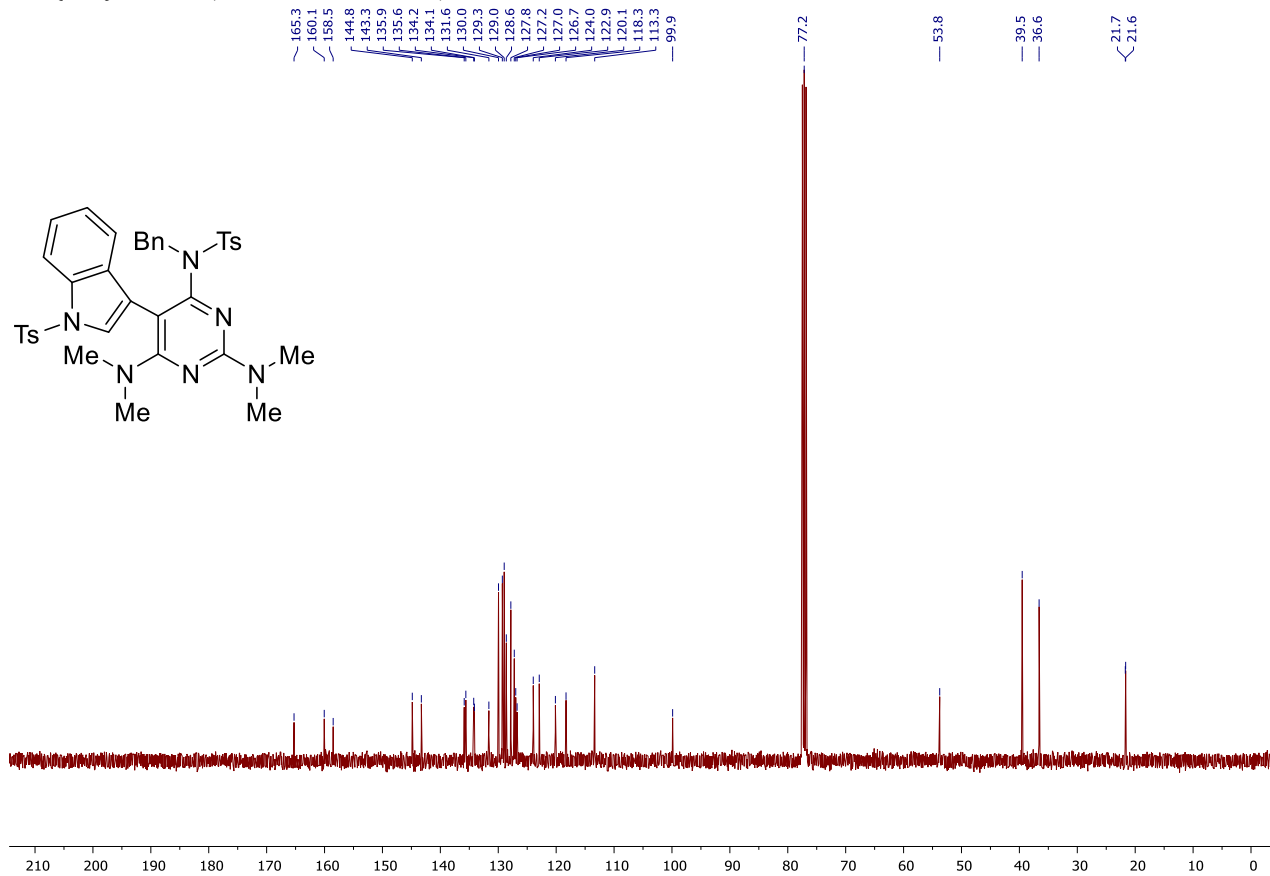

$^1\text{H}$  NMR (400 MHz,  $\text{CDCl}_3$ ) of **6t**

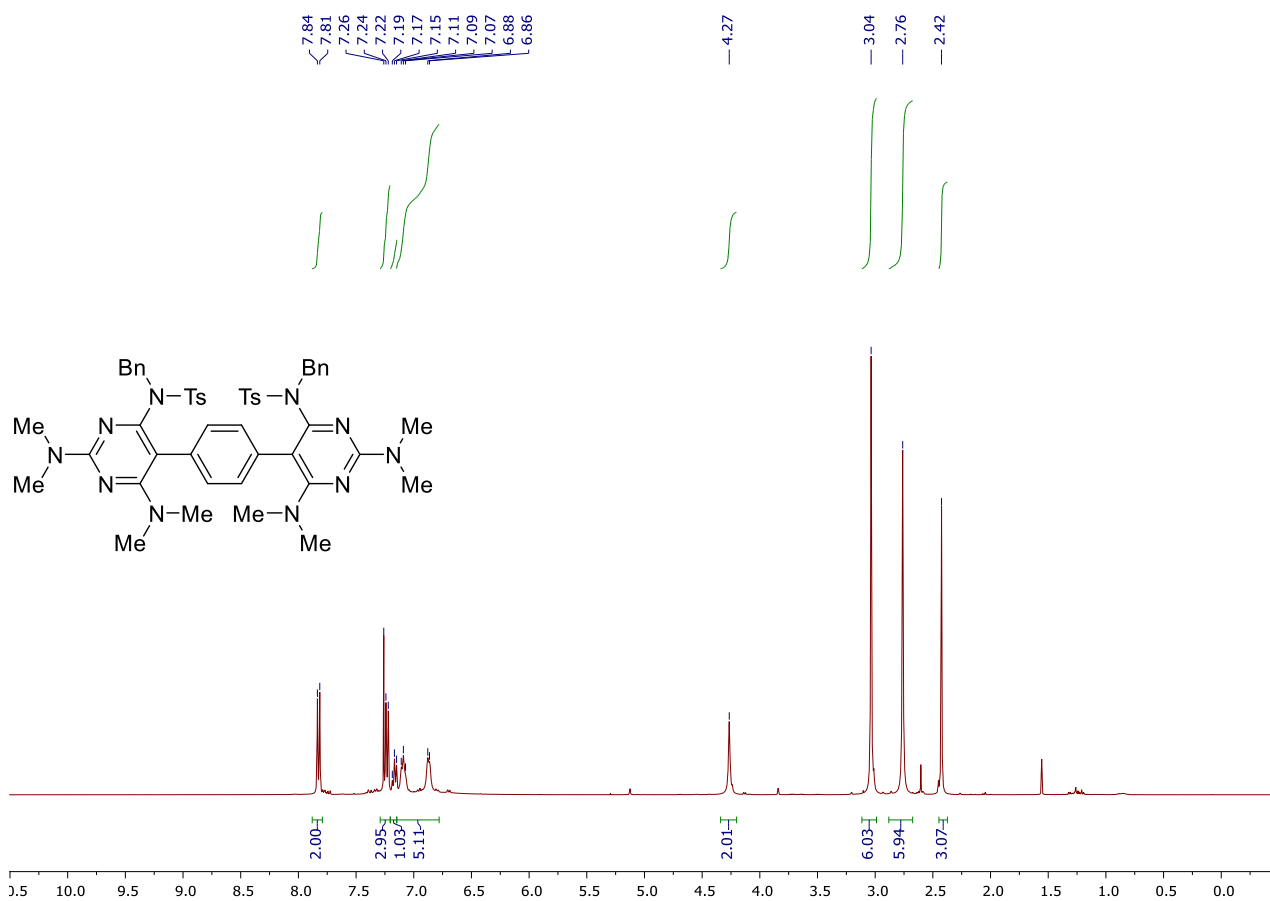

$^{13}\text{C}\{^1\text{H}\}$  NMR (100 MHz,  $\text{CDCl}_3$ ) of **6t**

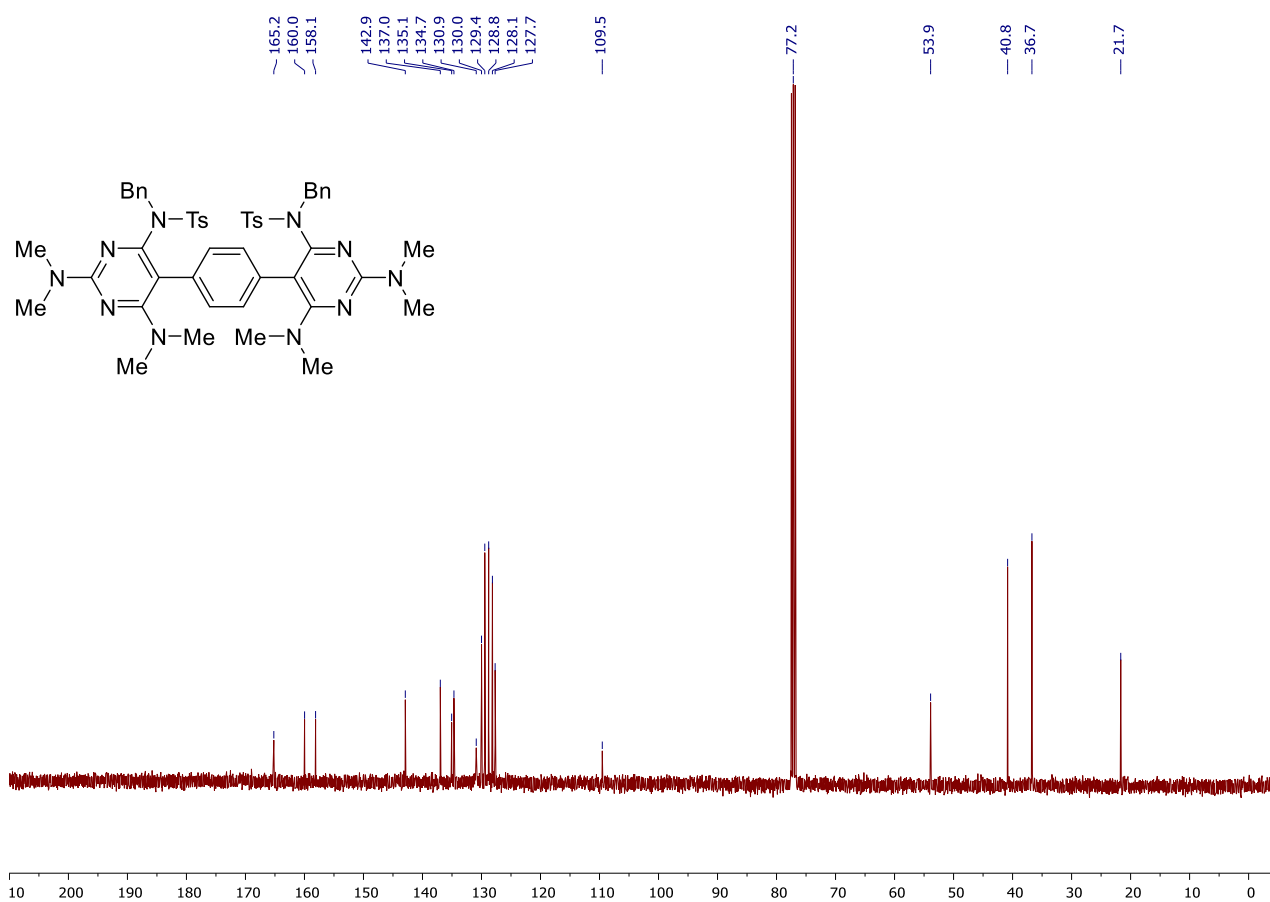

$^1\text{H}$  NMR (400 MHz,  $\text{CDCl}_3$ ) of **7**

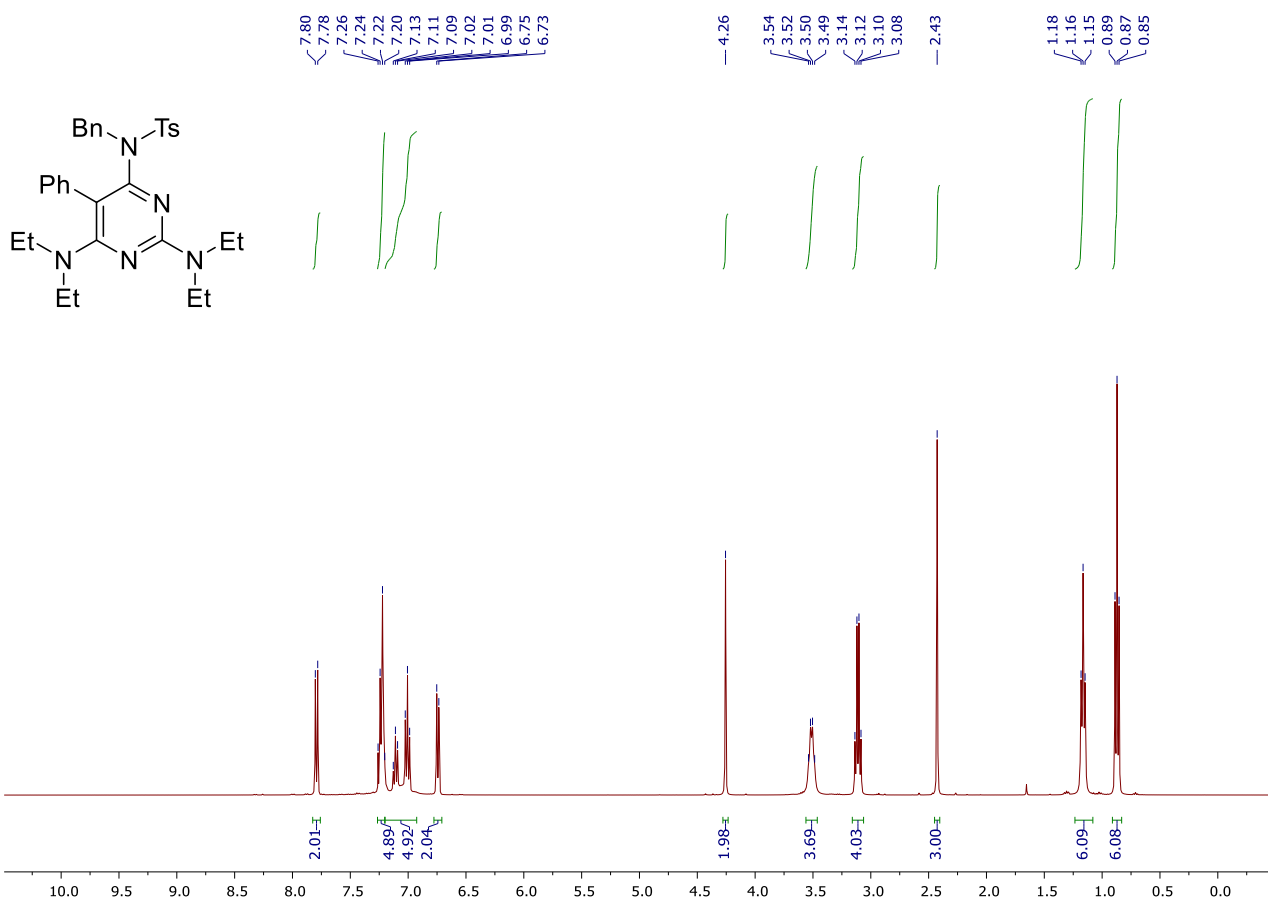

$^{13}\text{C}\{^1\text{H}\}$  NMR (100 MHz,  $\text{CDCl}_3$ ) of **7**

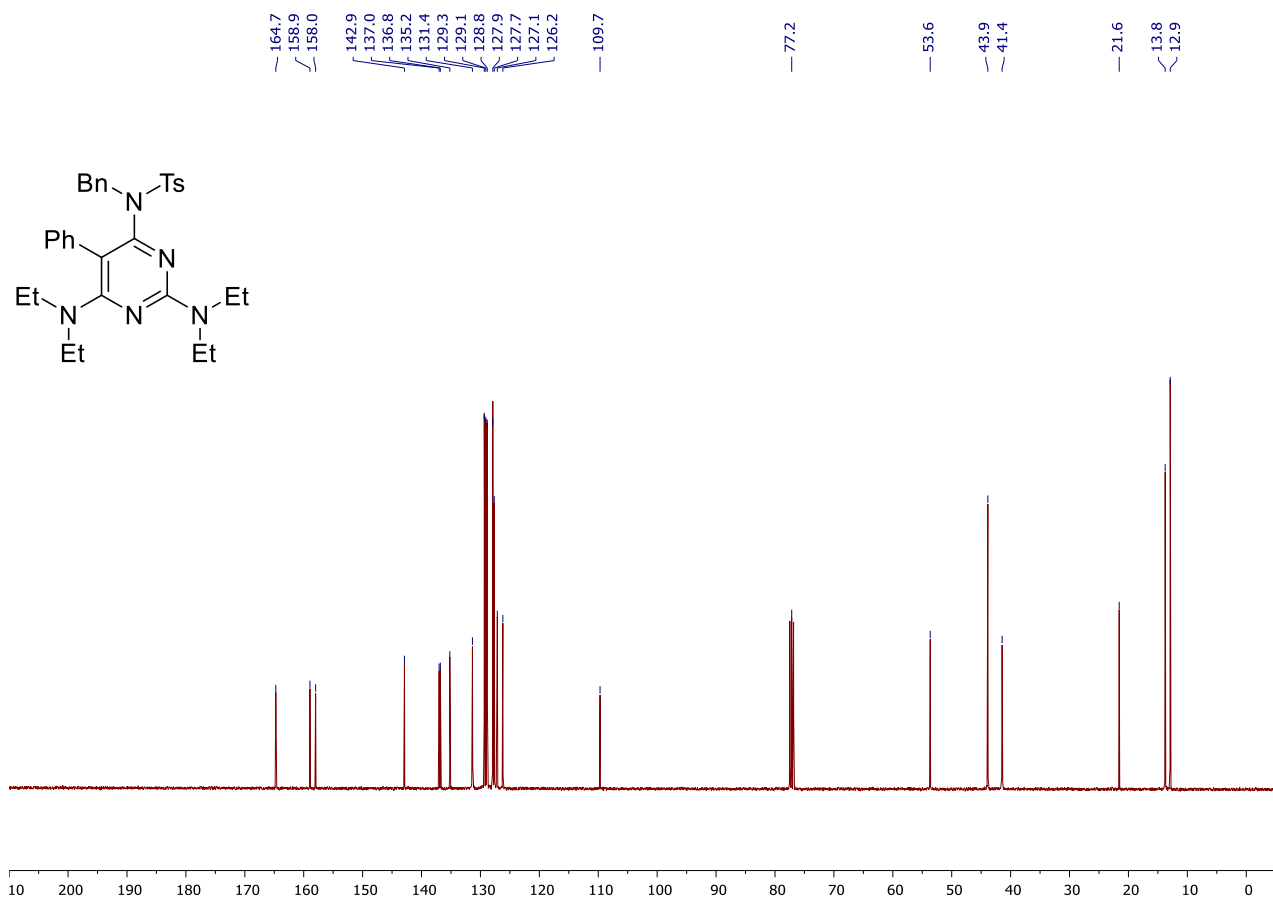

$^1\text{H}$  NMR (400 MHz,  $\text{CDCl}_3$ ) of **8**

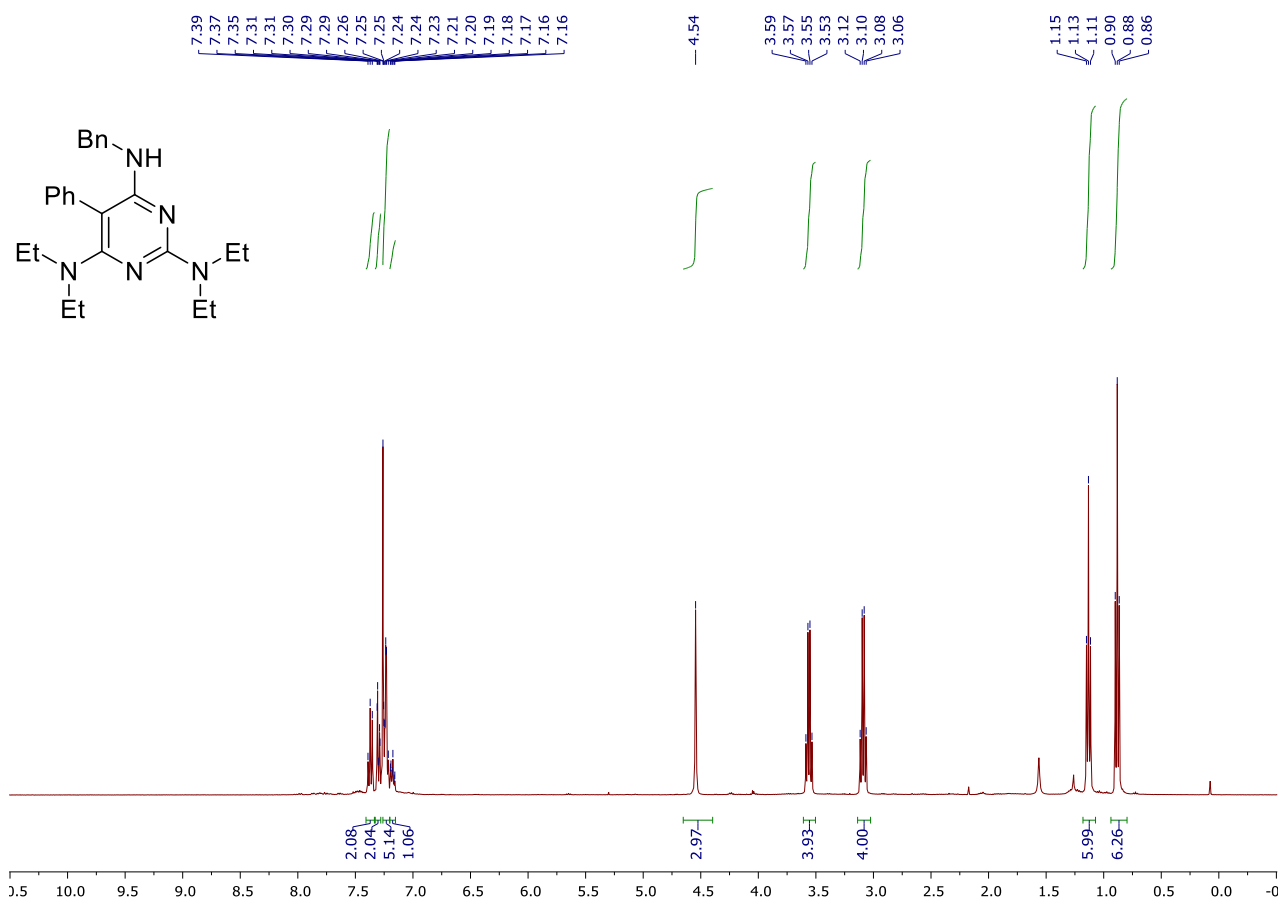

$^{13}\text{C}\{^1\text{H}\}$  NMR (100 MHz,  $\text{CDCl}_3$ ) of **8**

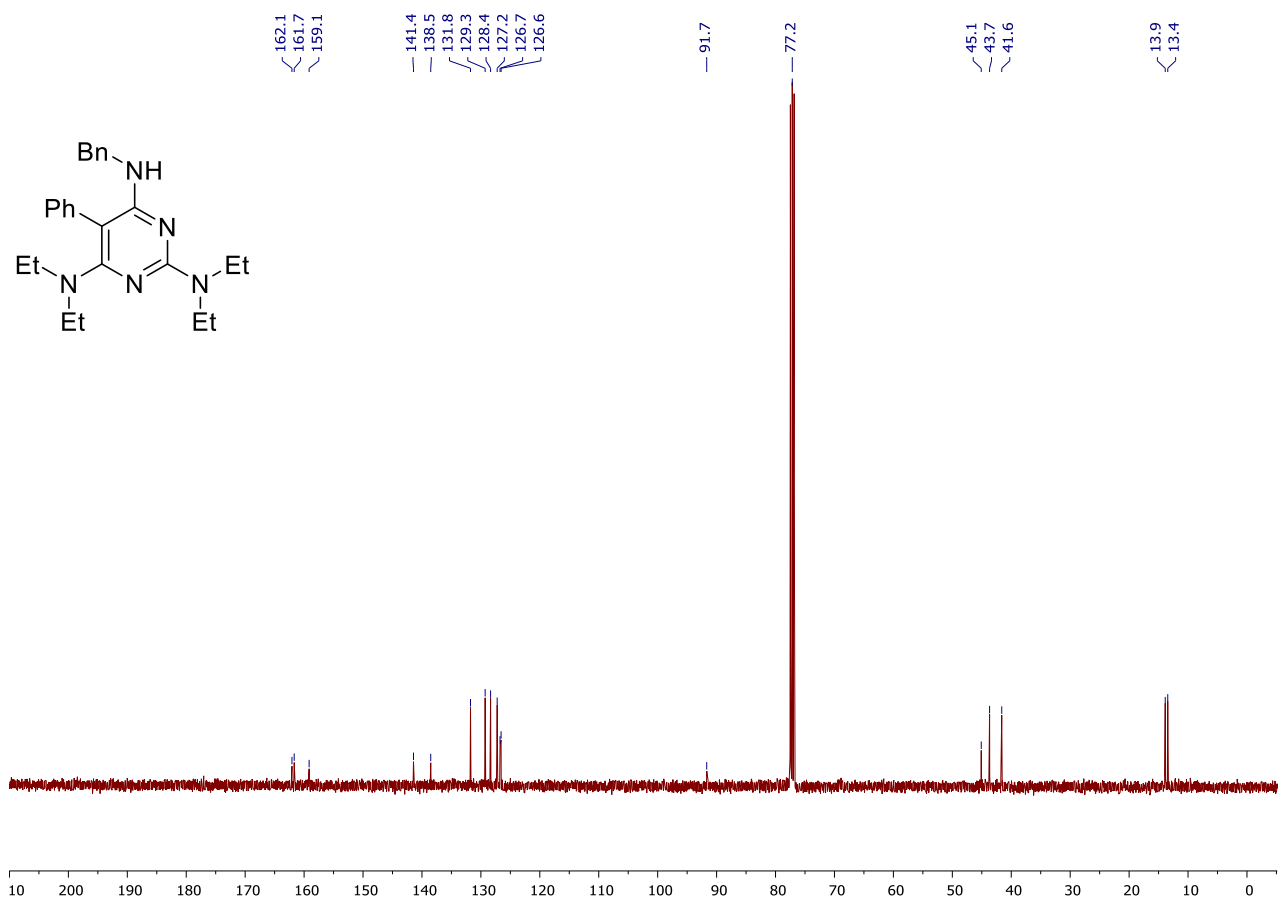



$^1\text{H}$  NMR (400 MHz,  $\text{CDCl}_3$ ) of **9**

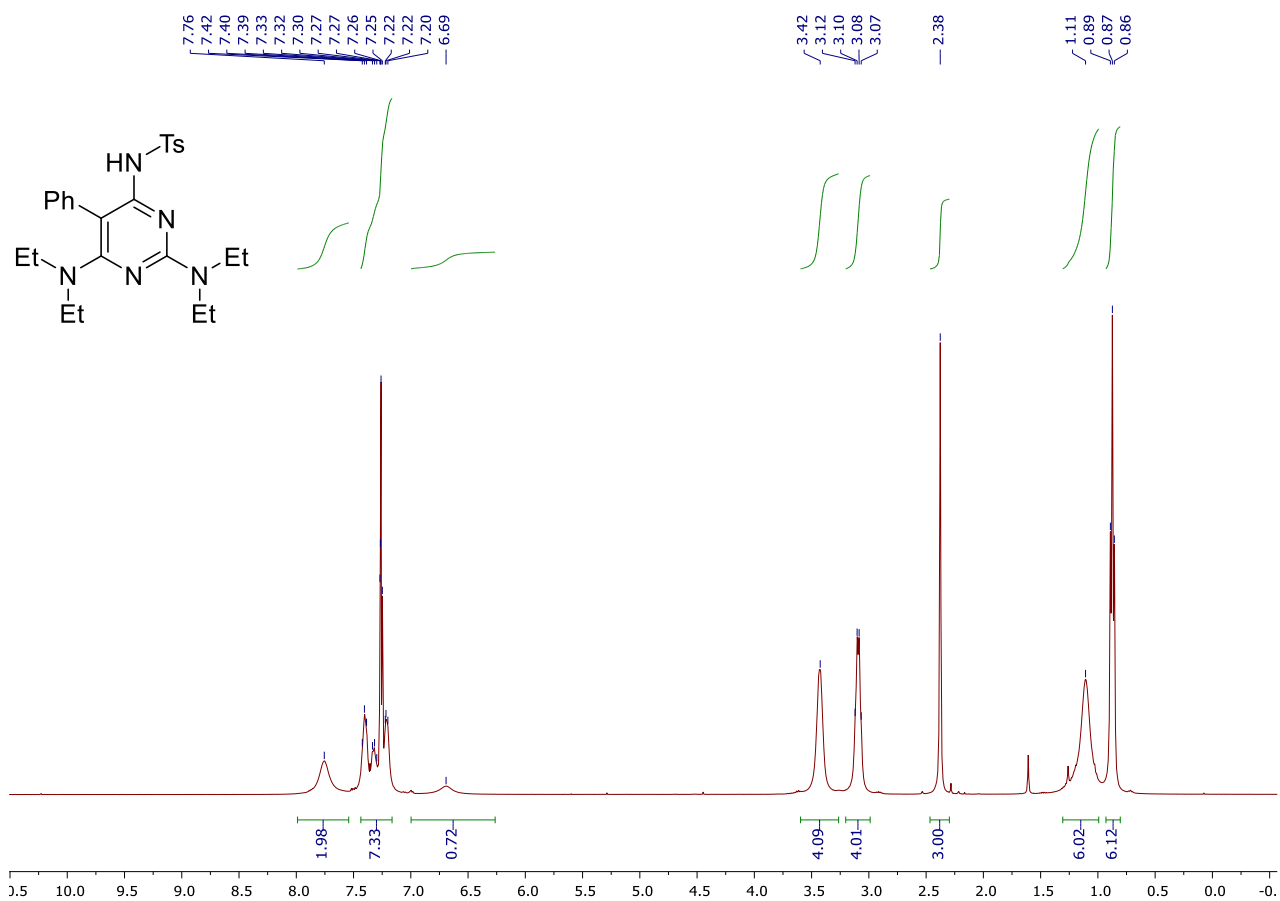

$^{13}\text{C}\{^1\text{H}\}$  NMR (100 MHz,  $\text{CDCl}_3$ ) of **9**

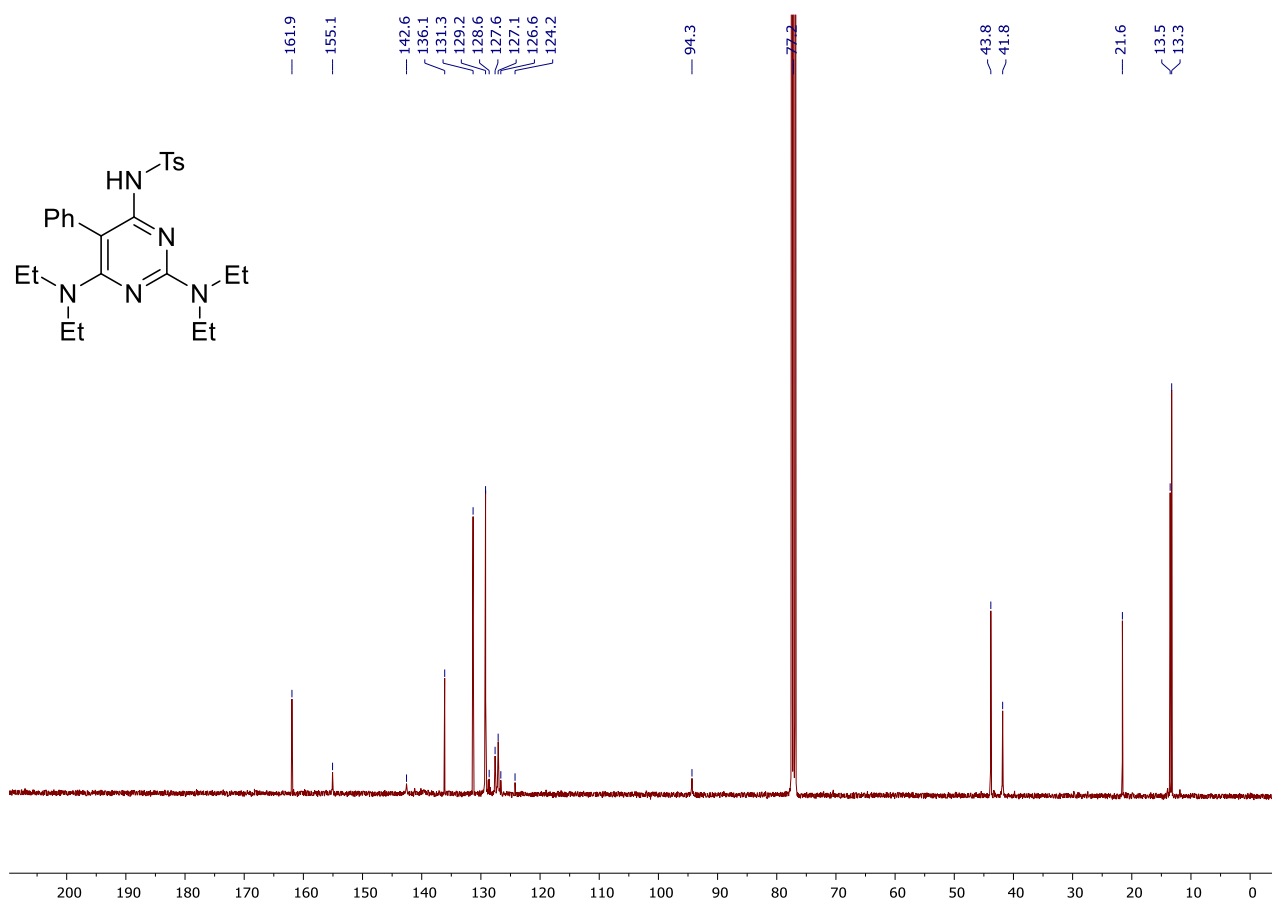

$^1\text{H}$  NMR (400 MHz,  $\text{CDCl}_3$ ) of **10**

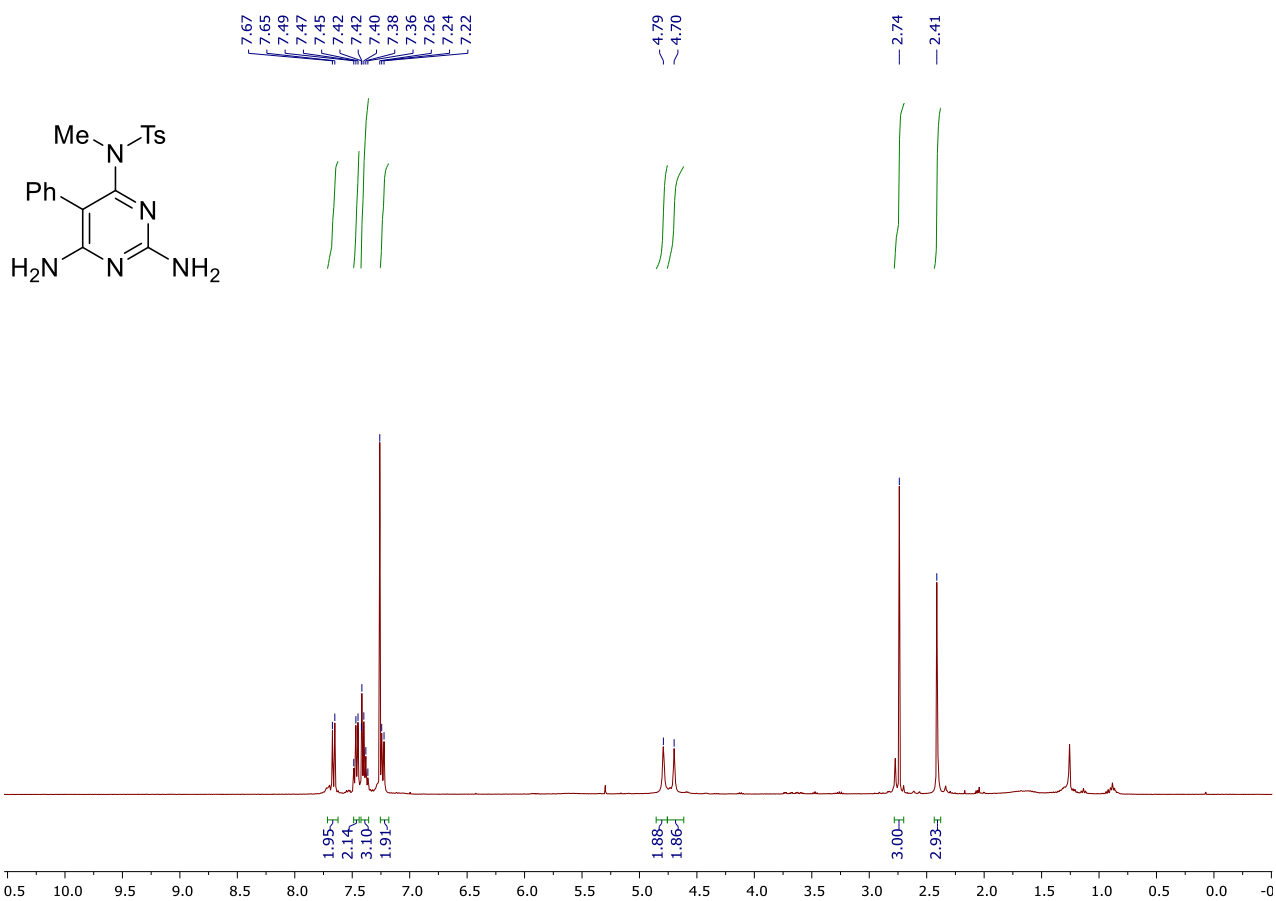

$^{13}\text{C}\{^1\text{H}\}$  NMR (100 MHz,  $\text{CDCl}_3$ ) of **10**

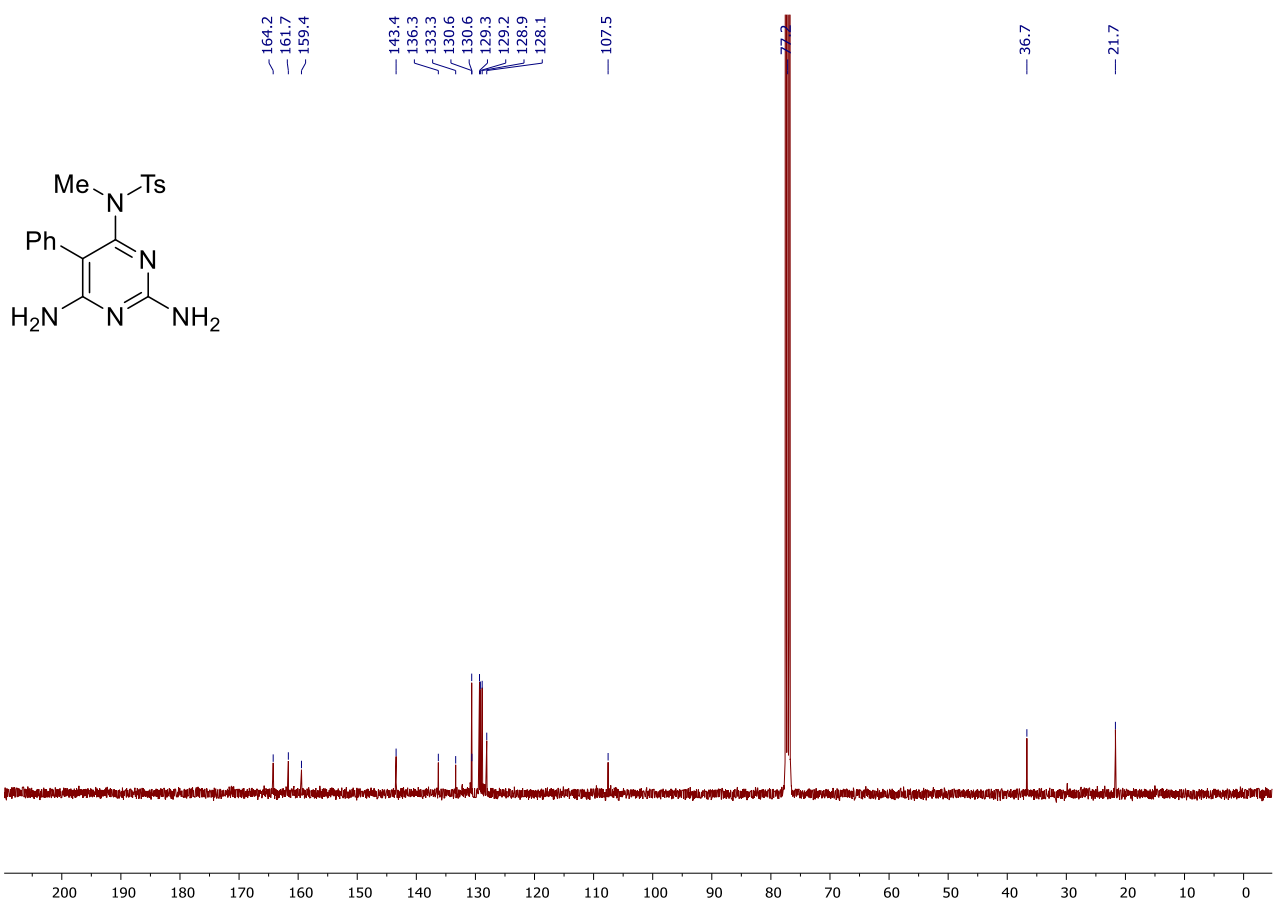

$^1\text{H}$  NMR (400 MHz,  $\text{CDCl}_3$ ) of **10'**

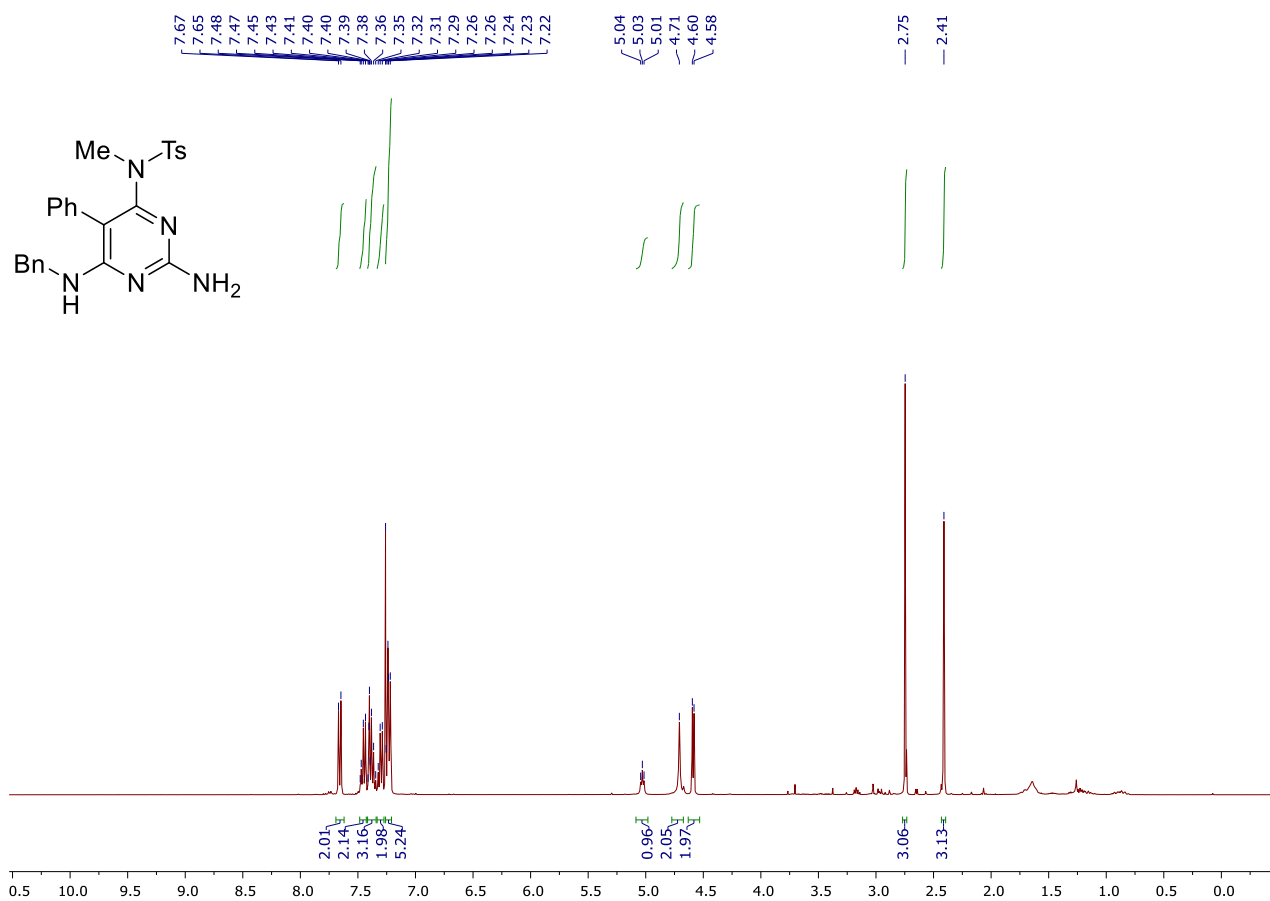

$^{13}\text{C}\{^1\text{H}\}$  NMR (100 MHz,  $\text{CDCl}_3$ ) of **10'**

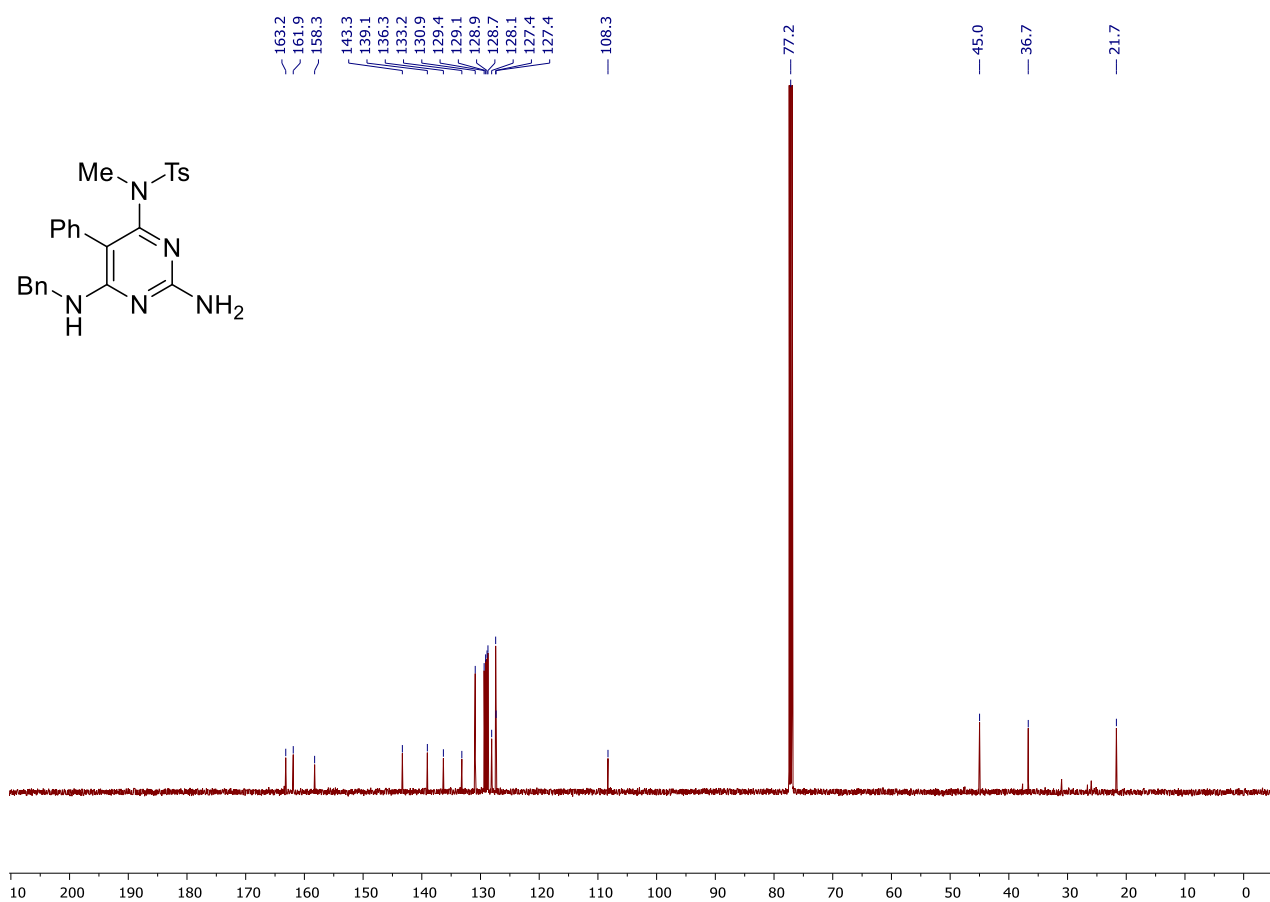

$^1\text{H}$  NMR (400 MHz,  $\text{CDCl}_3$ ) of **1a'**

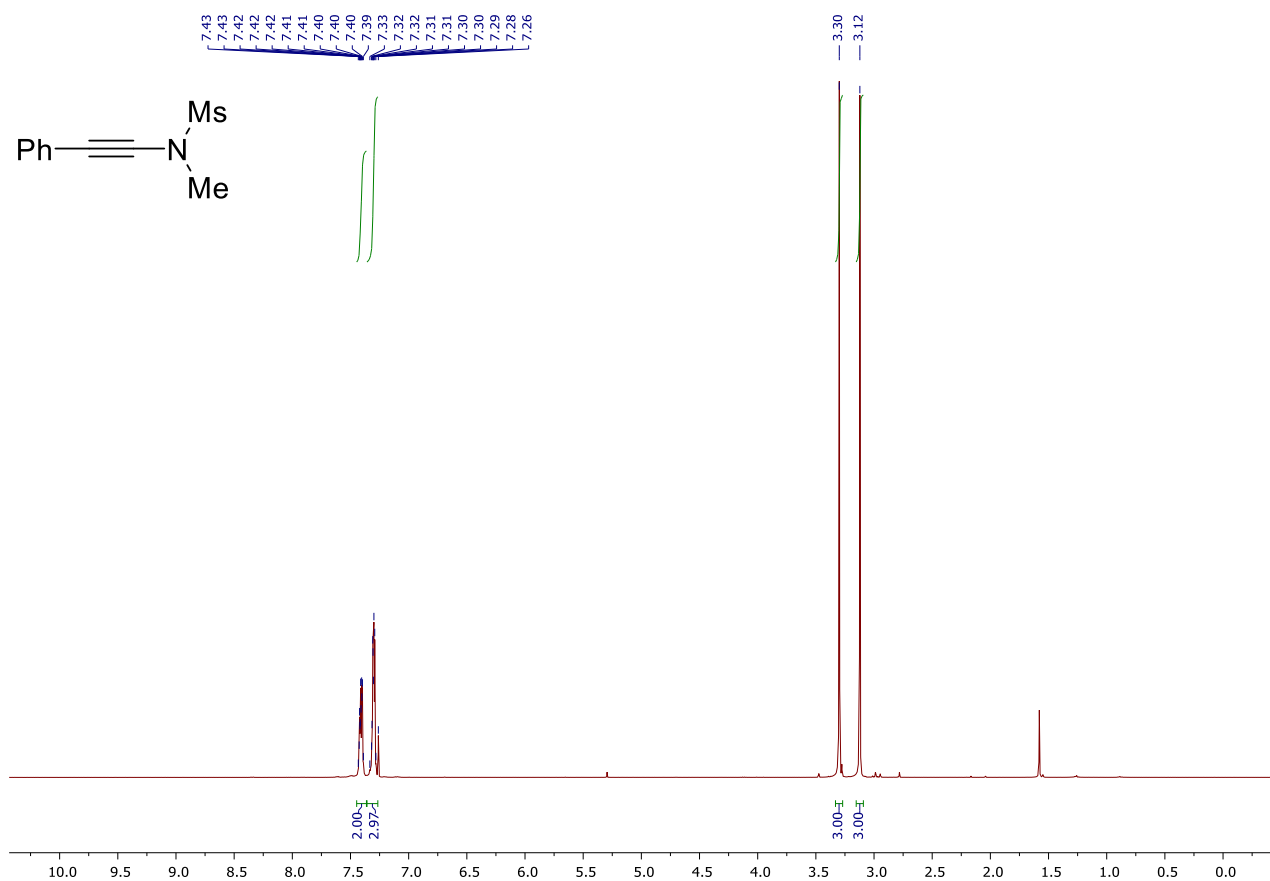

$^{13}\text{C}\{^1\text{H}\}$  NMR (100 MHz,  $\text{CDCl}_3$ ) of **1a'**

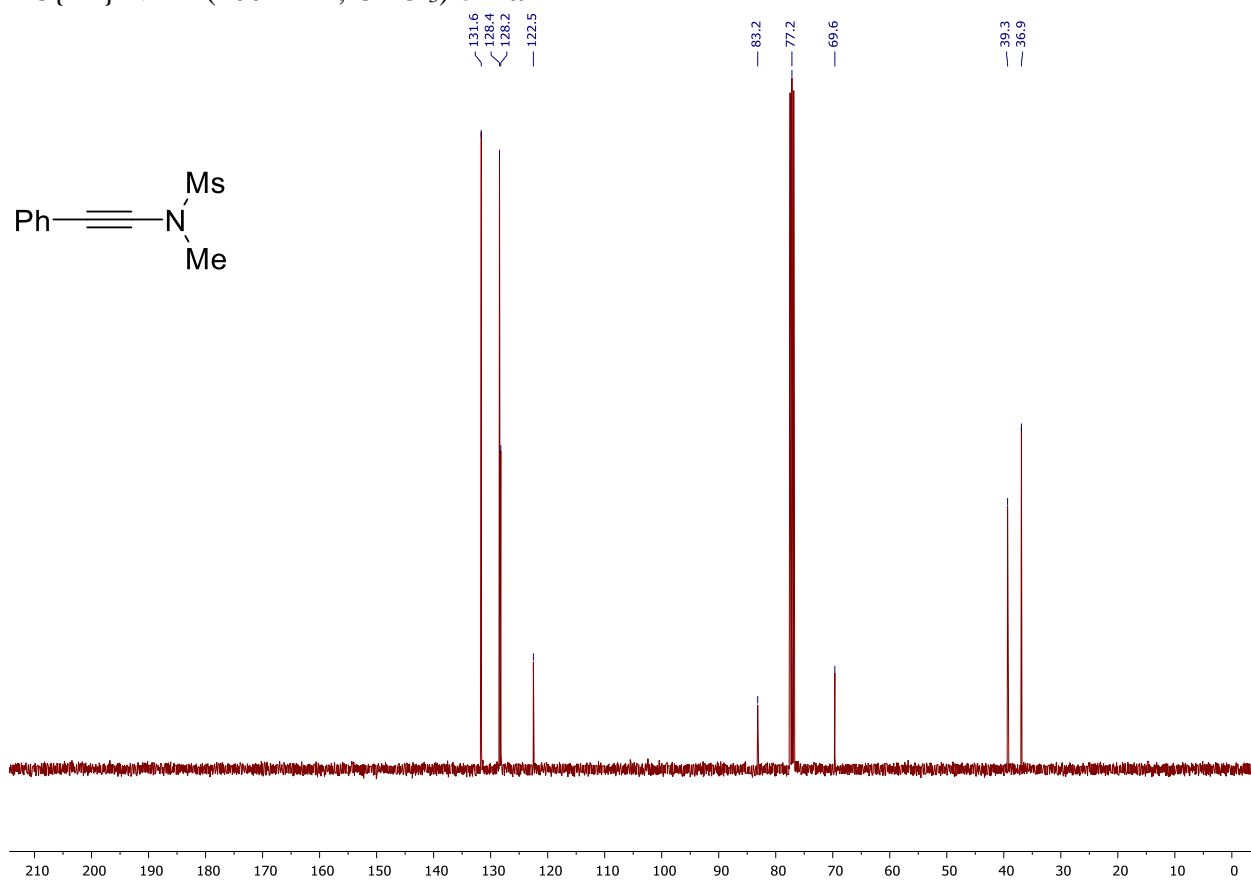

$^1\text{H}$  NMR (400 MHz,  $\text{CDCl}_3$ ) of **1e**

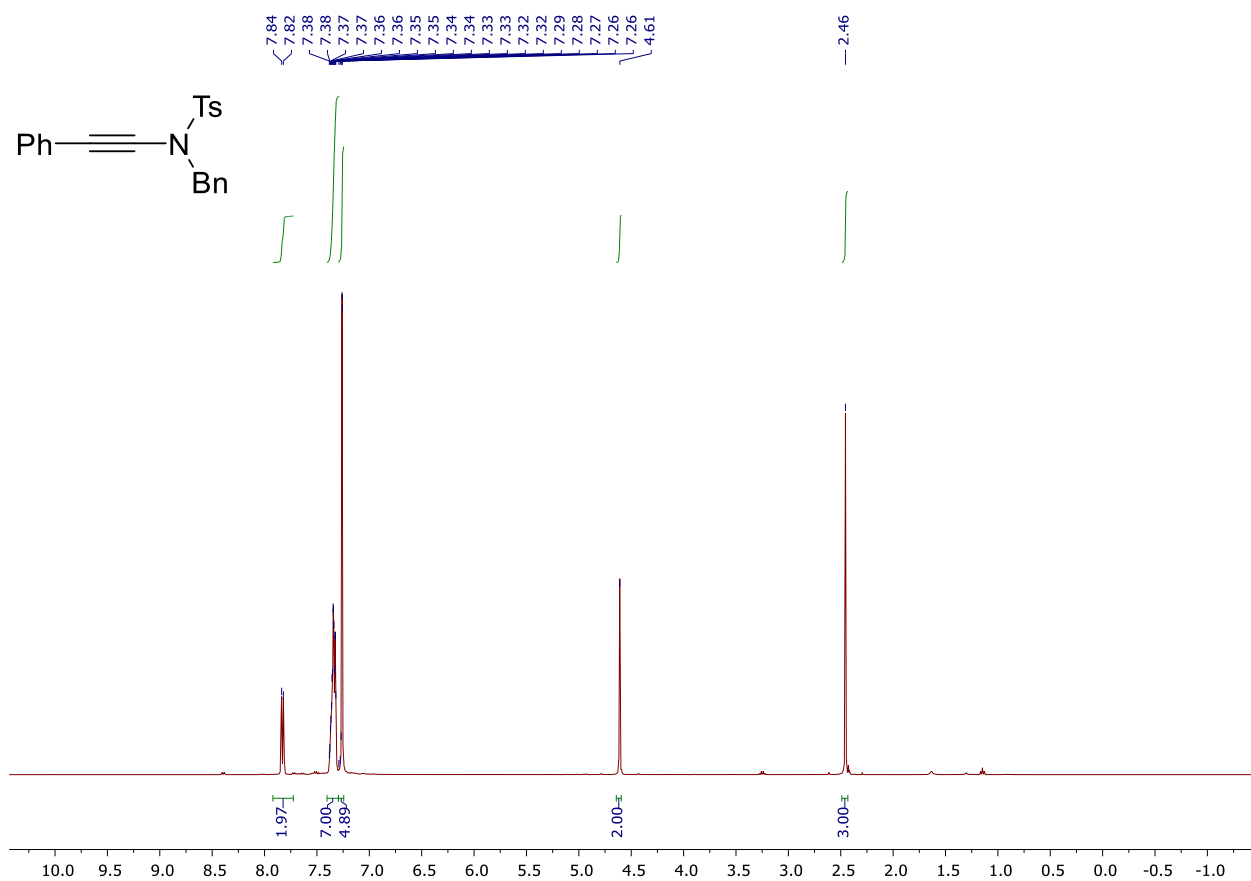

$^{13}\text{C}\{^1\text{H}\}$  NMR (100 MHz,  $\text{CDCl}_3$ ) of **1e**

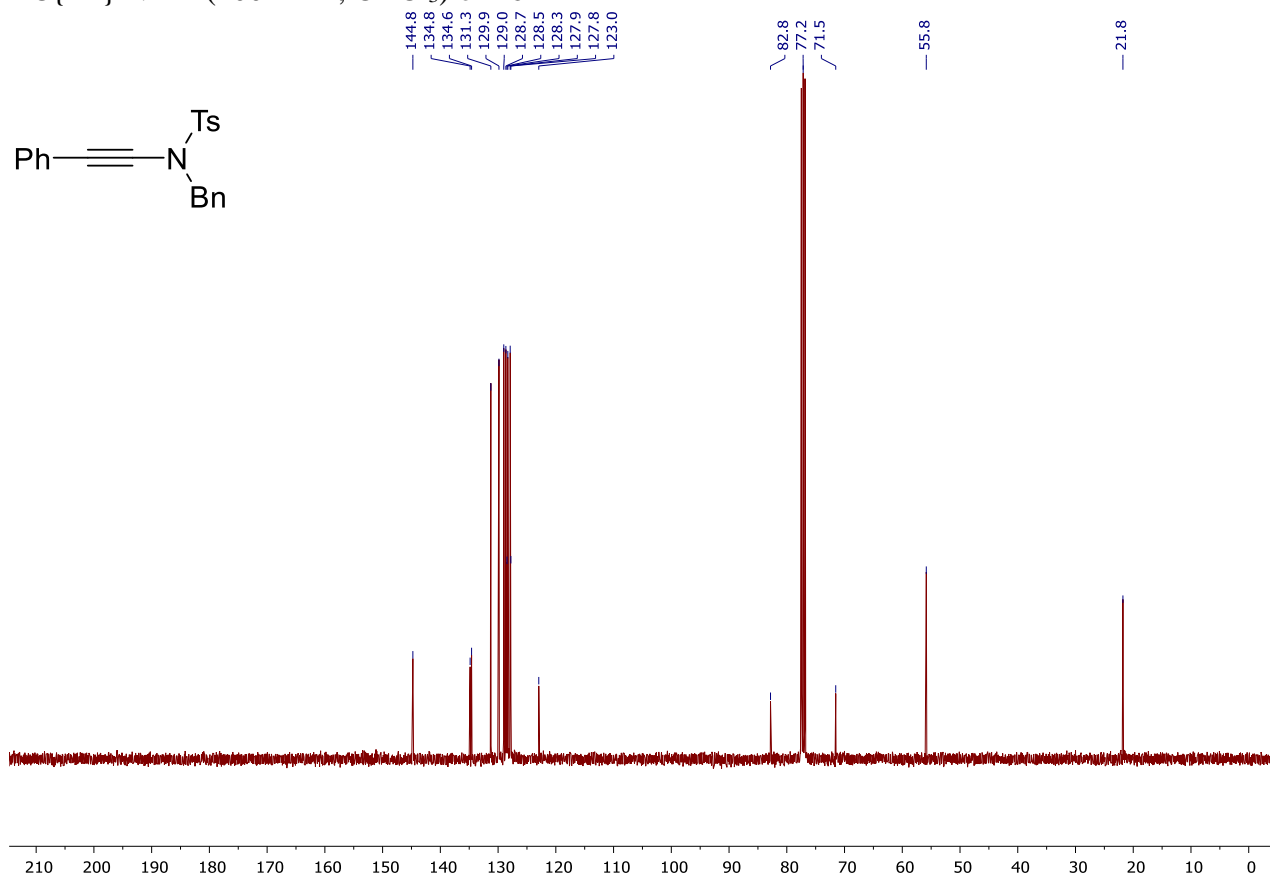

$^1\text{H}$  NMR (400 MHz,  $\text{CDCl}_3$ ) of **1g**

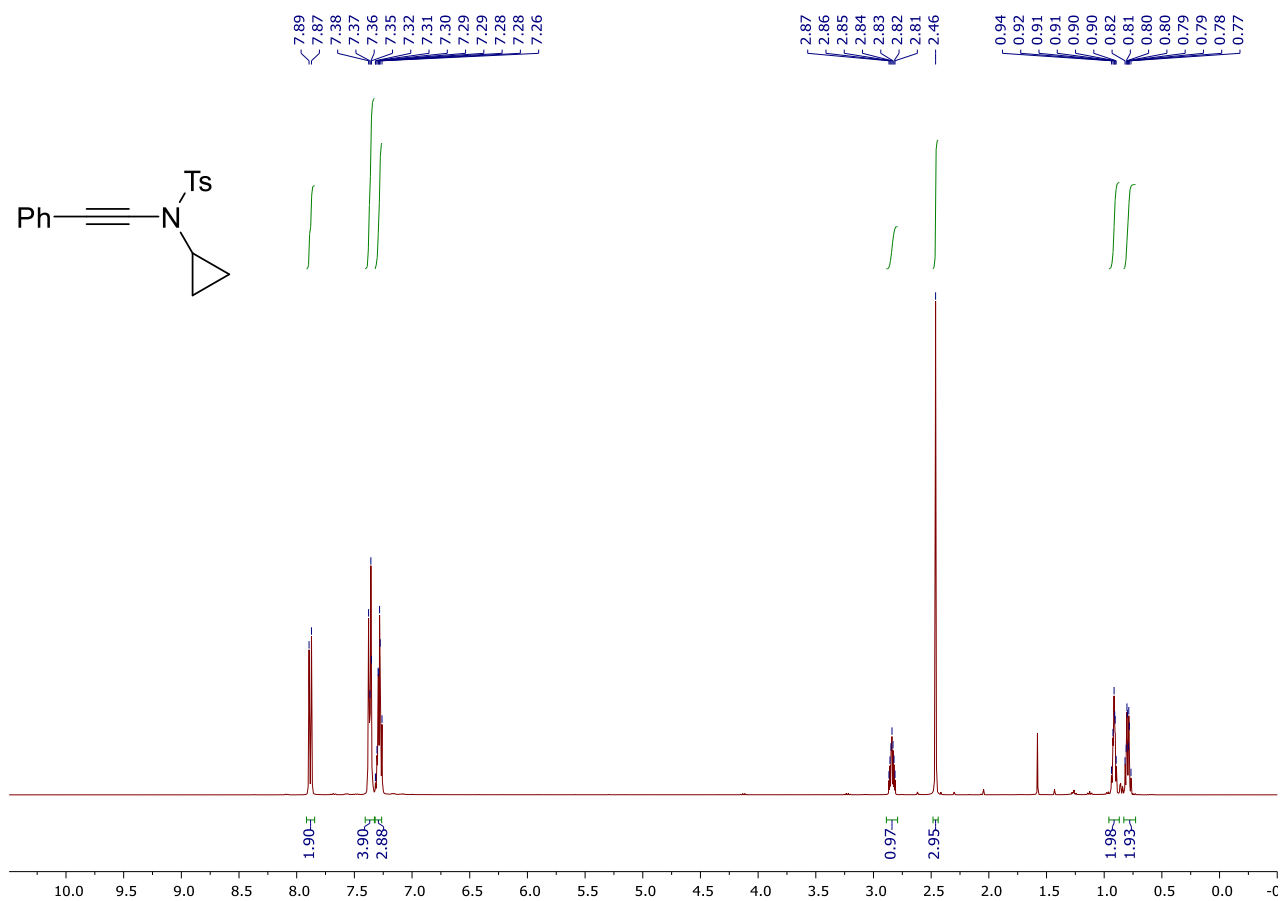

$^{13}\text{C}\{^1\text{H}\}$  NMR (100 MHz,  $\text{CDCl}_3$ ) of **1g**

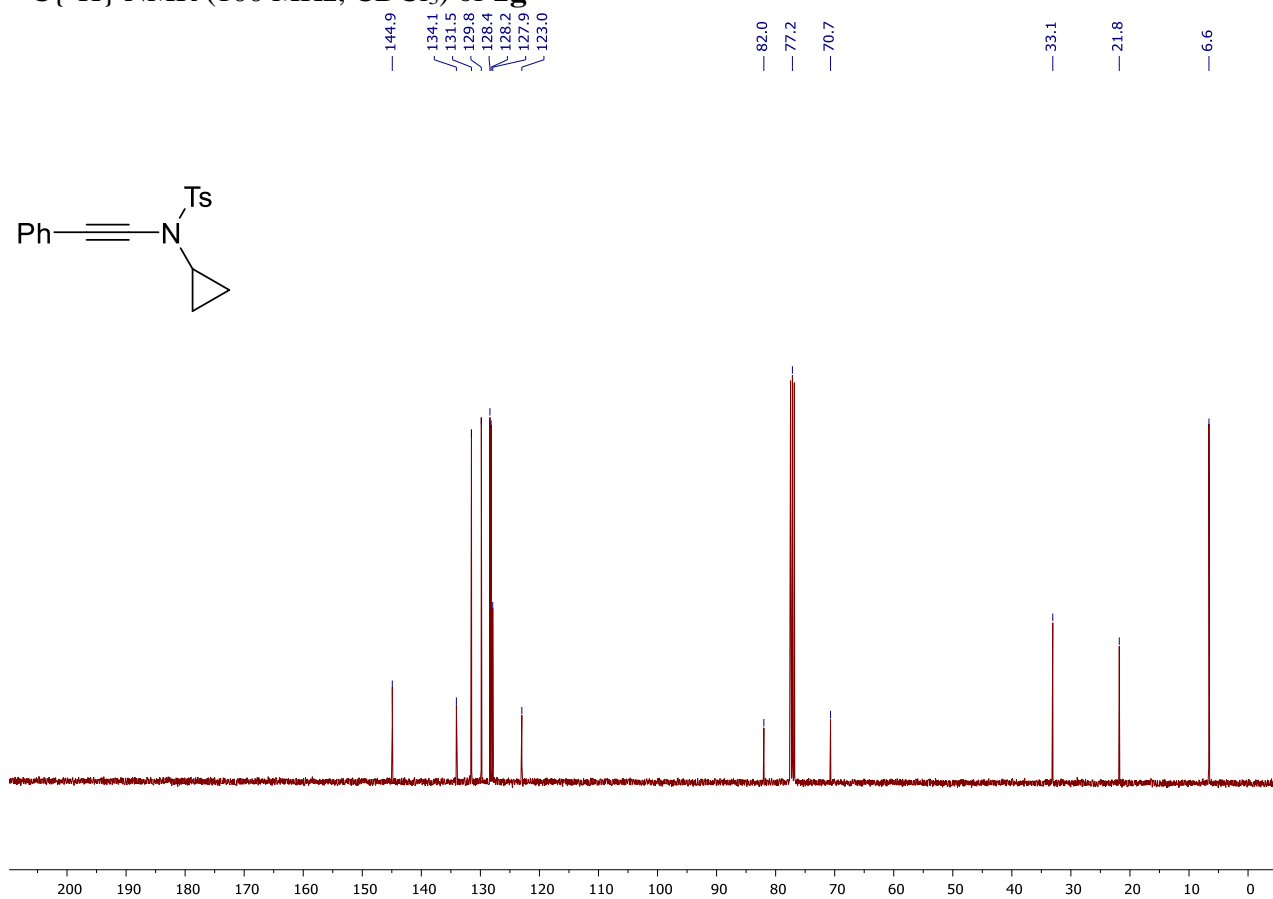

$^1\text{H}$  NMR (400 MHz,  $\text{CDCl}_3$ ) of **1h**

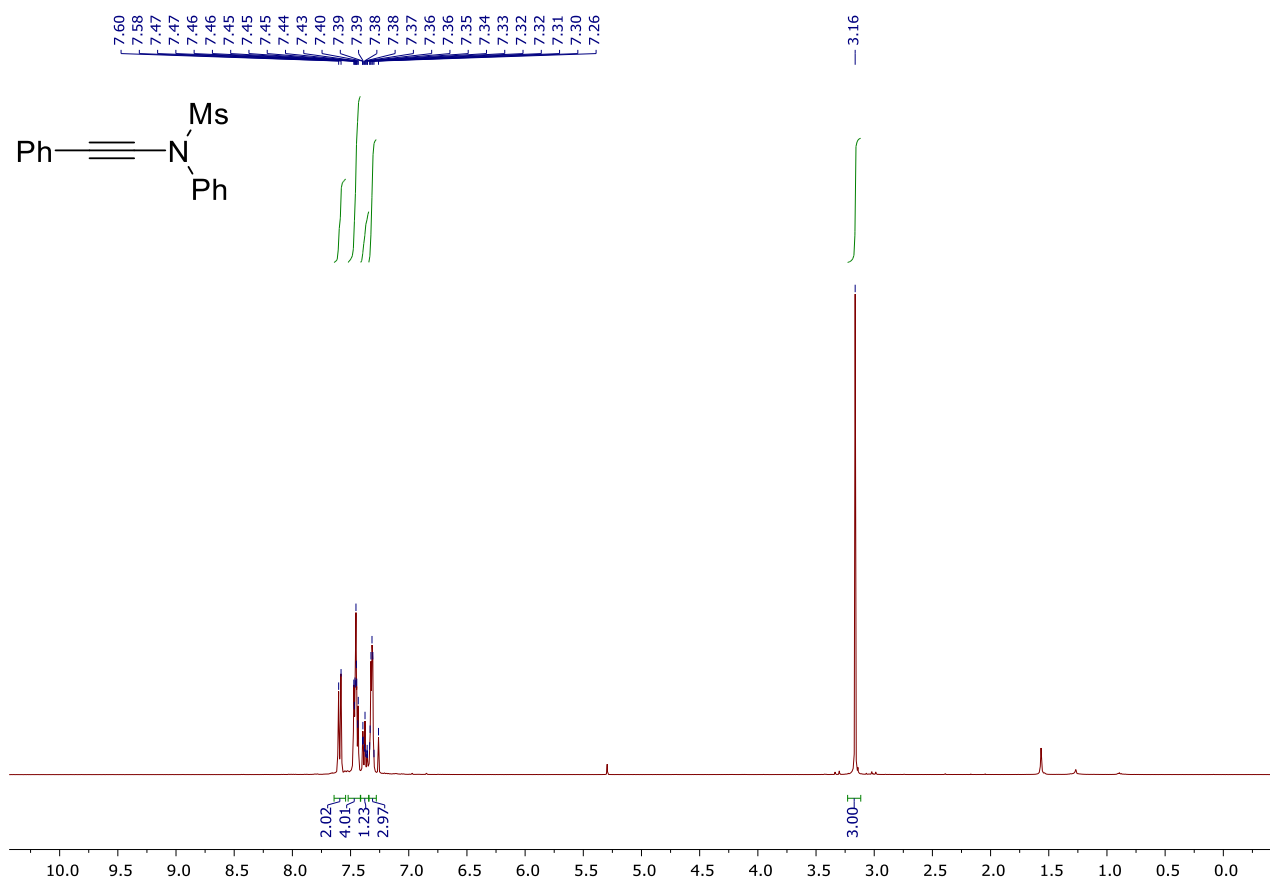

$^{13}\text{C}\{^1\text{H}\}$  NMR (100 MHz,  $\text{CDCl}_3$ ) of **1h**

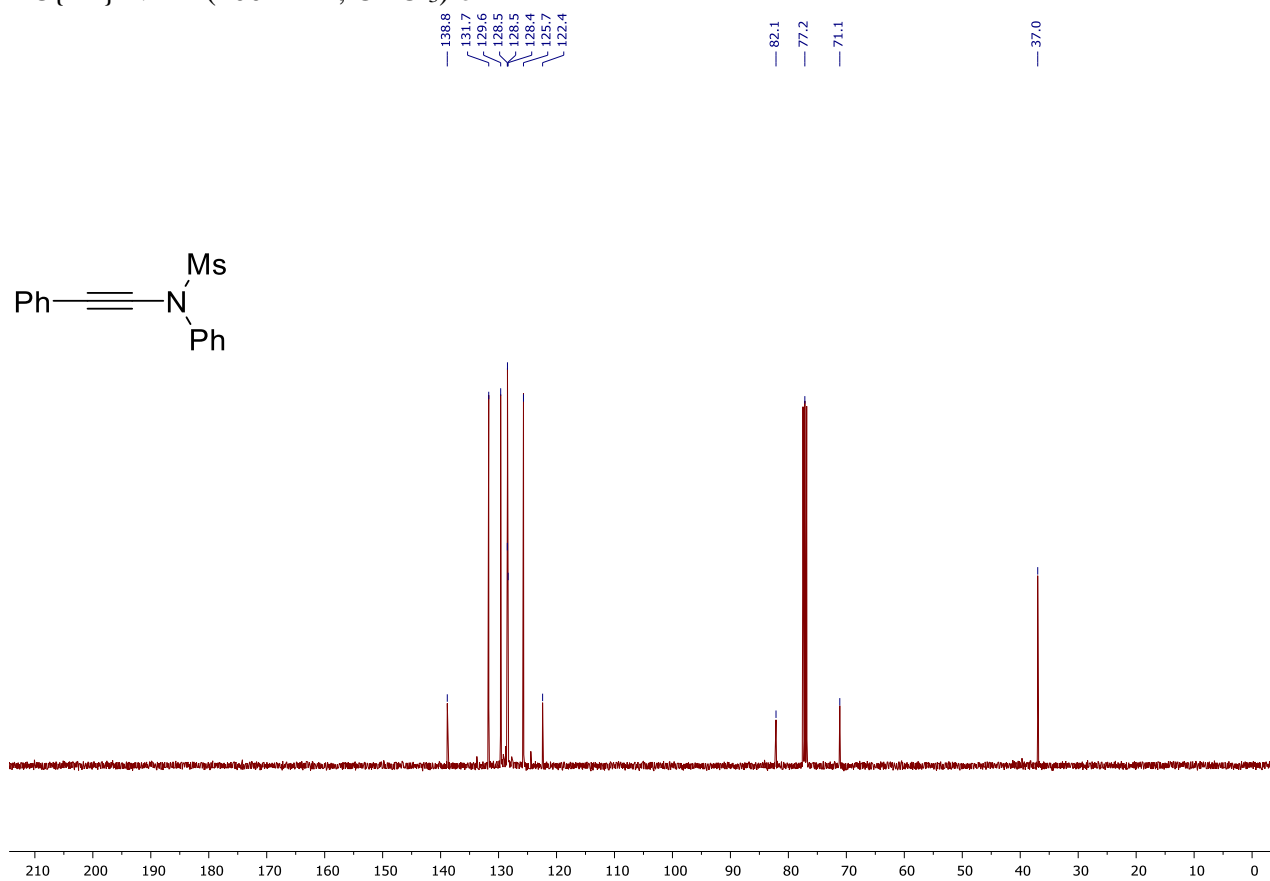

$^1\text{H}$  NMR (400 MHz,  $\text{CDCl}_3$ ) of **1n**

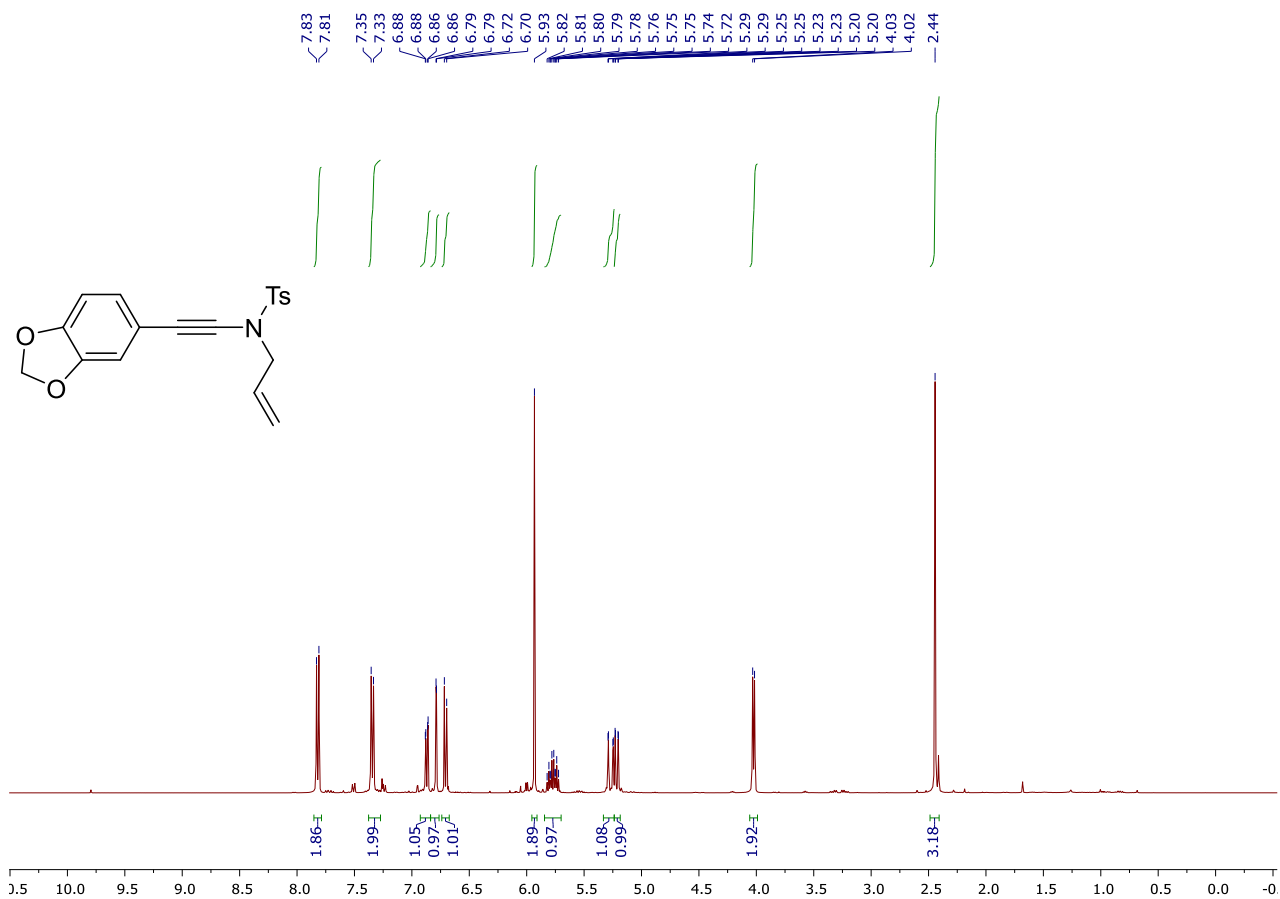

$^{13}\text{C}\{^1\text{H}\}$  NMR (100 MHz,  $\text{CDCl}_3$ ) of **1n**

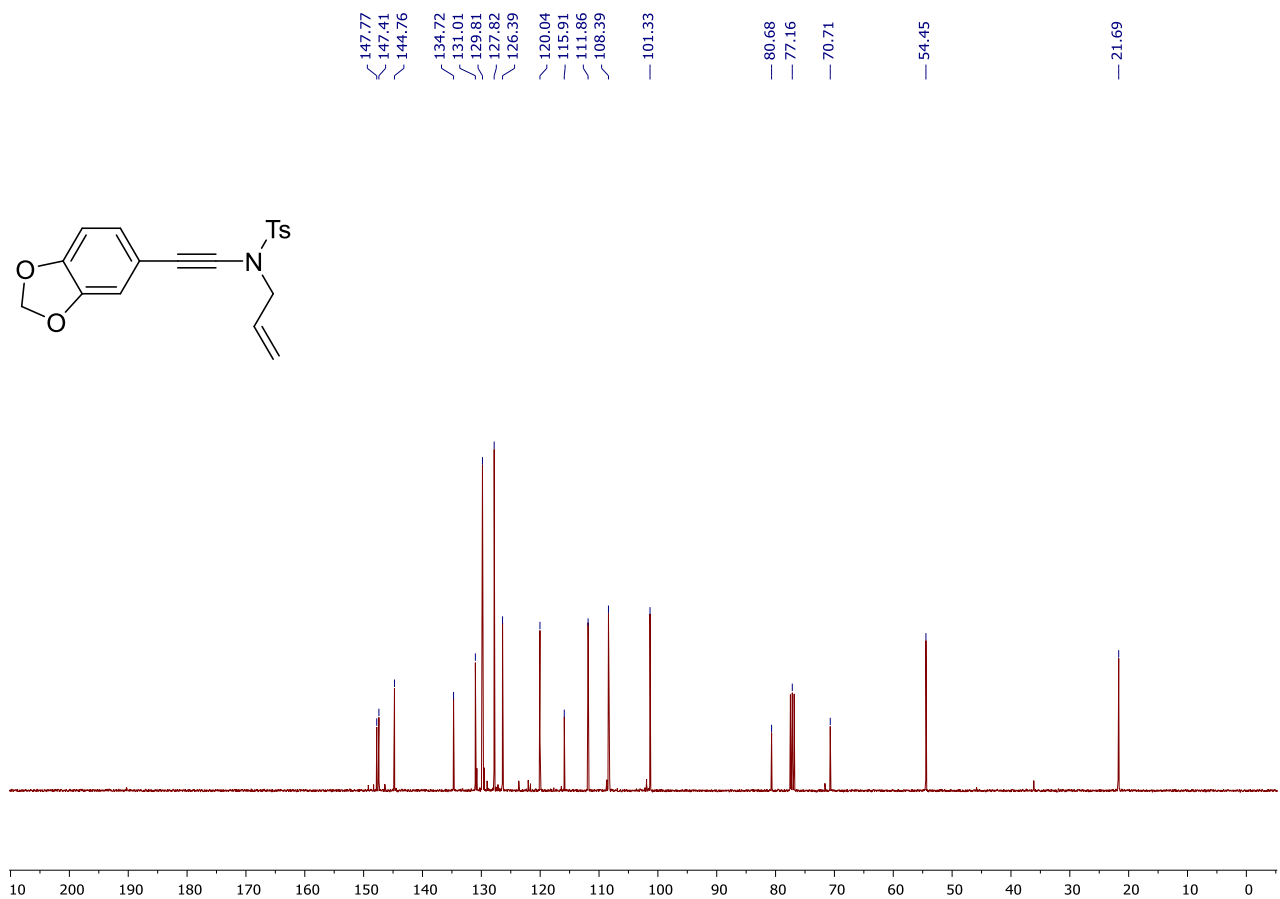



$^1\text{H}$  NMR (400 MHz,  $\text{CDCl}_3$ ) of **1p**

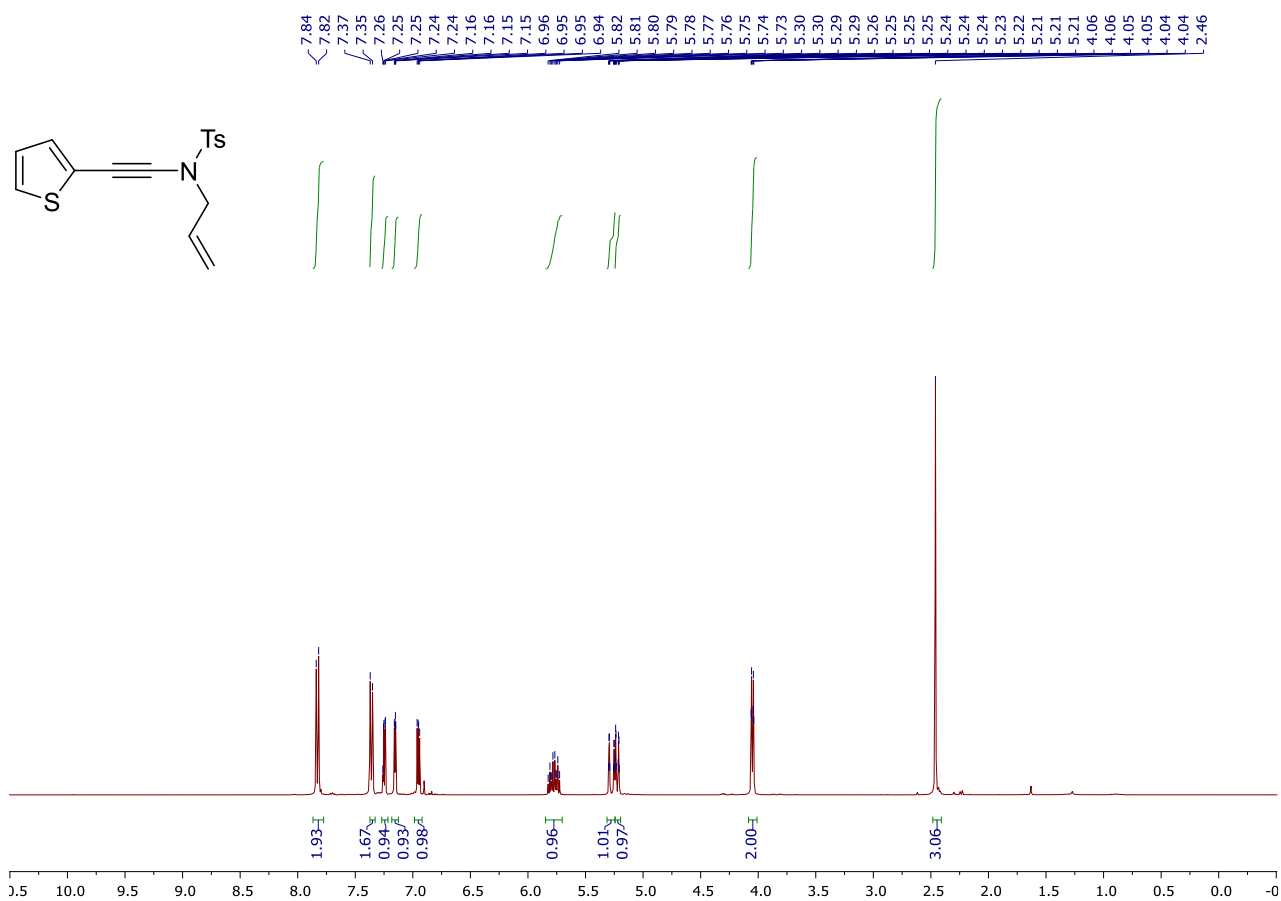

$^{13}\text{C}\{^1\text{H}\}$  NMR (100 MHz,  $\text{CDCl}_3$ ) of **1p**

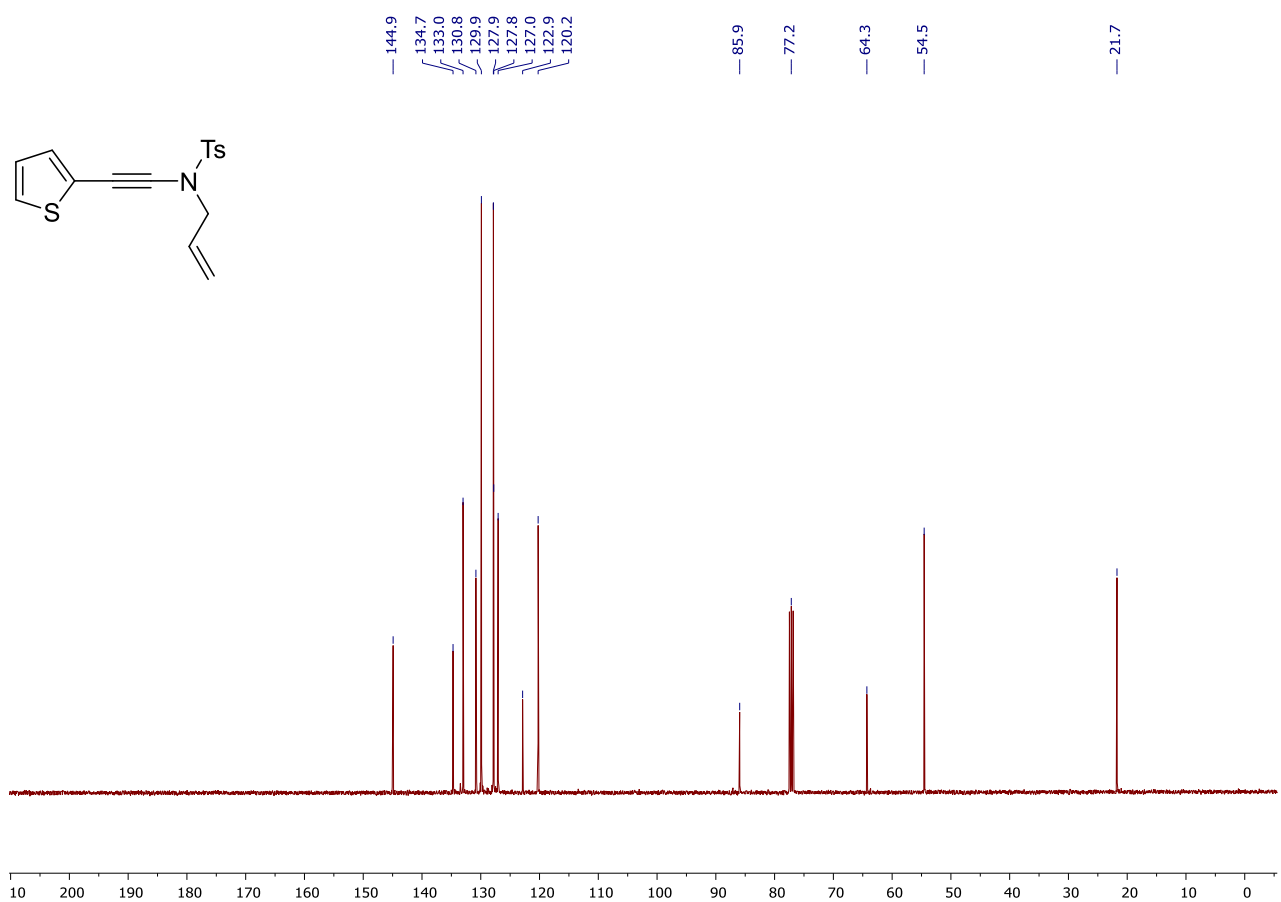

## 5. Computational Details

The full geometry optimization of all model structures was carried out at the DFT level of theory using the Becke's three-parameter hybrid exchange functional in combination with the gradient-corrected correlation functional of Lee, Yang, and Parr (B3LYP) [(a) A. D. Becke, *J. Chem. Phys.* **1993**, *98*, 5648-5652; (b) C. Lee, W. Yang, R. G. Parr, *Phys. Rev. B: Condens. Matter Mater. Phys.* **1988**, *37*, 785-789] with the help of Gaussian-09 program package [M. J. Frisch, G. W. Trucks, H. B. Schlegel, G. E. Scuseria, M. A. Robb, J. R. Cheeseman, G. Scalmani, V. Barone, B. Mennucci, G. A. Petersson, H. Nakatsuji, M. Caricato, X. Li, H. P. Hratchian, A. F. Izmaylov, J. Bloino, G. Zheng, J. L. Sonnenberg, M. Hada, M. Ehara, K. Toyota, R. Fukuda, J. Hasegawa, M. Ishida, T. Nakajima, Y. Honda, O. Kitao, H. Nakai, T. Vreven, J. A. Montgomery Jr., J. E. Peralta, F. Ogliaro, M. Bearpark, J. J. Heyd, E. Brothers, K. N. Kudin, V. N. Staroverov, T. Keith, R. Kobayashi, J. Normand, K. Raghavachari, A. Rendell, J. C. Burant, S. S. Iyengar, J. Tomasi, M. Cossi, N. Rega, J. M. Millam, M. Klene, J. E. Knox, J. B. Cross, V. Bakken, C. Adamo, J. Jaramillo, R. Gomperts, R. E. Stratmann, O. Yazyev, A. J. Austin, R. Cammi, C. Pomelli, J. W. Ochterski, R. L. Martin, K. Morokuma, V. G. Zakrzewski, G. A. Voth, P. Salvador, J. J. Dannenberg, S. Dapprich, A. D. Daniels, O. Farkas, J. B. Foresman, J. V. Ortiz, J. Cioslowski and D. J. Fox, in *Gaussian 09, Revision C.01*, Gaussian, Inc., Wallingford, CT, 2010]. The quasi-relativistic pseudopotential MWB60 [D. Andrae, U. Häußermann, M. Dolg, H. Stoll, H. Preuß, *Theor. Chim. Acta* **1990**, *77*, 123-141] that described 60 core electrons and appropriate contracted basis set were used for the gold atom and standard 6-31G\* basis sets were used for other atoms. No symmetry restrictions have been applied during the geometry optimization procedure. The Hessian matrices were calculated analytically for all optimized model structures to prove the location of correct minima or saddle points on the potential energy surface (no imaginary frequencies or only one imaginary frequency, respectively) and to estimate the thermodynamic parameters, the latter being calculated at 25 °C (Tables S1 and S2). The nature of all transition states was studied by the analysis of vectors associated with the imaginary frequency and by the calculations of the intrinsic reaction coordinates (IRC) using the Gonzalez–Schlegel method [(a) C. Gonzalez, H. B. Schlegel, *J. Chem. Phys.* **1991**, *95*, 5853-5860; (b) C. Gonzalez, H. B. Schlegel, *J. Chem. Phys.* **1989**, *90*, 2154-2161; (c) C. Gonzalez, H. B. Schlegel, *J. Phys. Chem.* **1990**, *94*, 5523-5227]. The Cartesian atomic coordinates for all optimized equilibrium model structures are given in the attached xyz-files.

**Table S1.** Calculated total energies, enthalpies, Gibbs free energies (in Hartree), and entropies (in cal/mol•K) for optimized equilibrium model structures (E, H, G, and S, respectively).

| Model structure  | E              | H            | G            | S       |
|------------------|----------------|--------------|--------------|---------|
| <b>E_H</b>       | -1218.77009455 | -1218.446780 | -1218.520831 | 155.854 |
| <b>F_H</b>       | -1218.77158717 | -1218.448315 | -1218.522090 | 155.273 |
| <b>TS_H</b>      | -1218.74329468 | -1218.421583 | -1218.491125 | 146.363 |
| <b>G_H</b>       | -1218.78842112 | -1218.463793 | -1218.531117 | 141.695 |
| <b>E_Ph3PAu</b>  | -2390.32383202 | -2389.716483 | -2389.840917 | 261.893 |
| <b>F_Ph3PAu</b>  | -2390.32244371 | -2389.715017 | -2389.838179 | 259.216 |
| <b>TS_Ph3PAu</b> | -2390.30428122 | -2389.698233 | -2389.816746 | 249.432 |
| <b>C_Ph3PAu</b>  | -2390.33574049 | -2389.726927 | -2389.843915 | 246.223 |
| <b>E_IPrAu</b>   | -2514.09483625 | -2513.174837 | -2513.327487 | 321.279 |
| <b>F_IPrAu</b>   | -2514.09460348 | -2513.174538 | -2513.327028 | 320.942 |
| <b>TS_IPrAu</b>  | -2514.07588328 | -2513.156971 | -2513.304221 | 309.915 |
| <b>G_IPrAu</b>   | -2514.10414615 | -2513.182633 | -2513.328831 | 307.700 |
| <b>E_AuPMe3</b>  | -1815.12166486 | -1814.684238 | -1814.784050 | 210.071 |
| <b>F_AuPMe3</b>  | -1815.12096567 | -1814.683598 | -1814.781664 | 206.398 |
| <b>TS_AuPMe3</b> | -1815.10158273 | -1814.665457 | -1814.759684 | 198.317 |
| <b>G_AuPMe3</b>  | -1815.13508296 | -1814.696257 | -1814.788005 | 193.100 |

**Table S2.** Calculated values of total activation and reaction energies ( $E_a$  and  $\Delta E$ ), enthalpies and Gibbs free energies of activation ( $\Delta H^\ddagger$  and  $\Delta G^\ddagger$ ) and reaction ( $\Delta H$  and  $\Delta G$ ) in kcal/mol.

| Transformation                                    | $E_a$ | $\Delta H^\ddagger$ | $\Delta G^\ddagger$ | $\Delta E$ | $\Delta H$ | $\Delta G$ |
|---------------------------------------------------|-------|---------------------|---------------------|------------|------------|------------|
| <b>E_H <math>\rightarrow</math> F_H</b>           |       |                     |                     | -0.9       | -1.0       | -0.8       |
| <b>E_H <math>\rightarrow</math> G_H</b>           | 16.8  | 15.8                | 18.6                | -11.5      | -10.7      | -6.5       |
| <b>E_Ph3PAu <math>\rightarrow</math> F_Ph3PAu</b> |       |                     |                     | 0.9        | 0.9        | 1.7        |
| <b>E_Ph3PAu <math>\rightarrow</math> G_Ph3PAu</b> | 12.3  | 11.5                | 15.2                | -7.5       | -6.6       | -1.9       |
| <b>E_IPrAu <math>\rightarrow</math> F_IPrAu</b>   |       |                     |                     | 0.1        | 0.2        | 0.3        |
| <b>E_IPrAu <math>\rightarrow</math> G_IPrAu</b>   | 11.9  | 11.2                | 14.6                | -5.8       | -4.9       | -0.8       |
| <b>E_AuPMe3 <math>\rightarrow</math> F_AuPMe3</b> |       |                     |                     | 0.4        | 0.4        | 1.5        |
| <b>E_AuPMe3 <math>\rightarrow</math> G_AuPMe3</b> | 12.6  | 11.8                | 15.3                | -8.4       | -7.5       | -2.5       |

**Table S3.** Calculated total energies, enthalpies, Gibbs free energies (in Hartree), and entropies (in cal/mol•K) for optimized equilibrium model structures (E, H, G, and S, respectively).

| Model structure           | E              | H            | G            | S       |
|---------------------------|----------------|--------------|--------------|---------|
| <b>E_H</b>                | -1446.19034410 | -1445.766300 | -1445.860068 | 197.352 |
| <b>TS_to_(E+2a)_H</b>     | -1446.18069208 | -1445.757444 | -1445.847221 | 188.951 |
| <b>(E+2a)_H</b>           | -1446.18228274 | -1445.757468 | -1445.845555 | 185.394 |
| <b>E_IPrAu</b>            | -2741.51024333 | -2740.489138 | -2740.662589 | 365.058 |
| <b>TS_to_(E+2a)_IPrAu</b> | -2741.48648860 | -2740.466499 | -2740.632456 | 349.287 |
| <b>(E+2a)_IPrAu</b>       | -2741.49229285 | -2740.470997 | -2740.636142 | 347.576 |

**Table S4.** Calculated values of total activation and reaction energies ( $E_a$  and  $\Delta E$ ), enthalpies and Gibbs free energies of activation ( $\Delta H^\ddagger$  and  $\Delta G^\ddagger$ ) and reaction ( $\Delta H$  and  $\Delta G$ ) in kcal/mol.

| Transformation                                             | $E_a$ | $\Delta H^\ddagger$ | $\Delta G^\ddagger$ | $\Delta E$ | $\Delta H$ | $\Delta G$ |
|------------------------------------------------------------|-------|---------------------|---------------------|------------|------------|------------|
| <b>E_H <math>\rightarrow</math> (E+2a)_H</b>               | 6.1   | 5.6                 | 8.1                 | 5.1        | 5.5        | 9.1        |
| <b>E_IPrAu <math>\rightarrow</math> TS_to_(E+2a)_IPrAu</b> | 14.9  | 14.2                | 18.9                | 11.3       | 11.4       | 16.6       |
